# Supplementary material
Source: publisher figshare collection journal article supplement (https://gsajournals.figshare.com/articles/dataset/_/6146681)
Supplement: Supplementary file 1 [file 1]

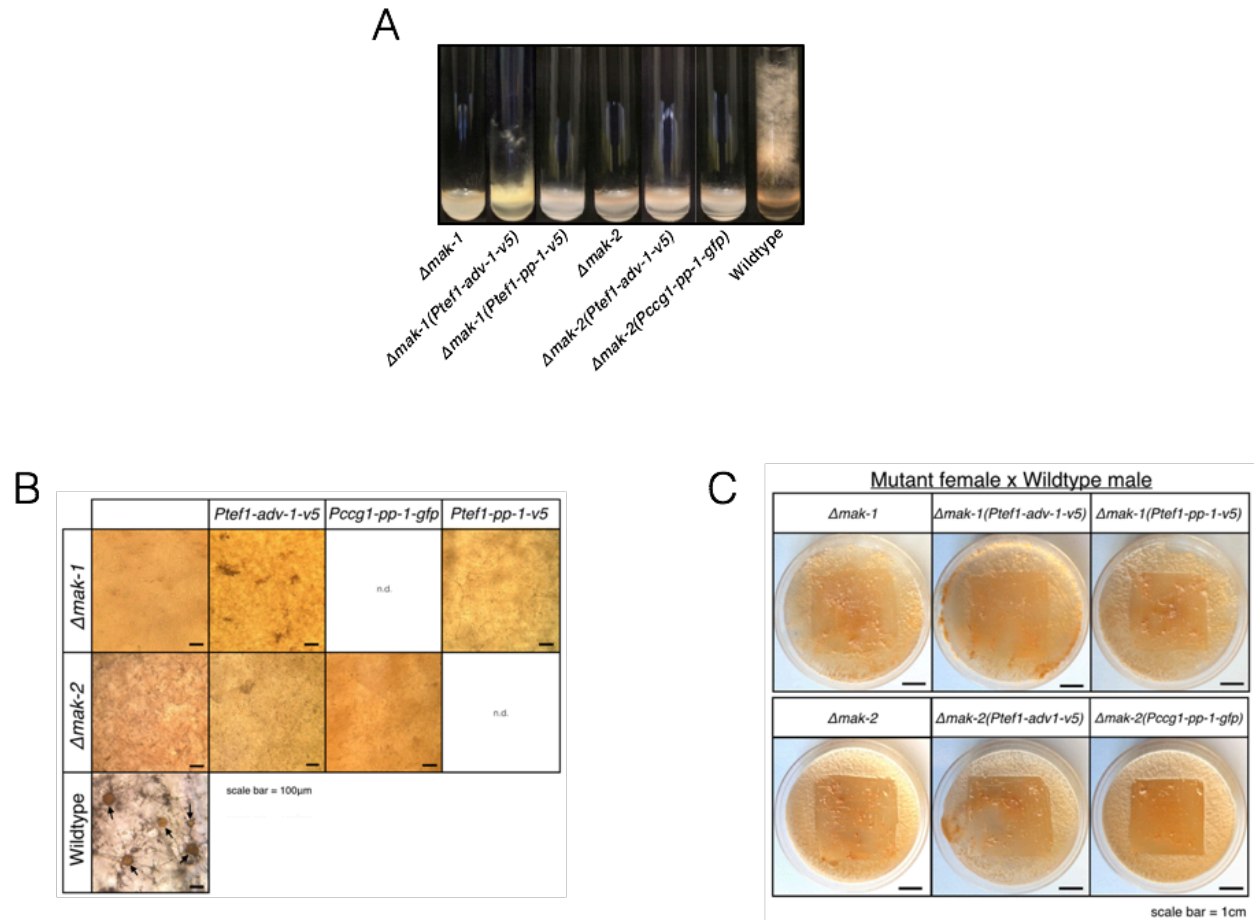

**Figure S6. Additional phenotypes of  $\Delta mak-1$  and  $\Delta mak-2$  mis-expression strains.**

(A) Representative sample of aerial hyphae growth assay of  $\Delta mak-1$  (*Ptef1-adv1-v5;his-3* (*MEadv-1*)),  $\Delta mak-1$  (*Ptef1-pp1-v5;his-3* (*MEpp-1*)),  $\Delta mak-2$  (*Ptef1-adv1-v5;his-3* (*MEadv-1*)) and  $\Delta mak-2$  (*Pccg1-pp1-gfp;his-3* (*MEpp-1*)) strains compared to  $\Delta mak-1$ ,  $\Delta mak-2$  and wild type cells. (B) Protoperithecial phenotype of each strains shown in (A). Arrows indicate protoperithecia. (C) Perithecial production in each strains shown in (A). Mutants were used as females with wild type males, added in a square shape to each plate of females. The formation of many black perithecia is indicative of successful mating.
