# Supplementary material
Source: publisher figshare collection journal article supplement (https://gsajournals.figshare.com/articles/dataset/_/6146681)
Supplement: Supplementary file 1 [file 1]

## Sheet: ADV1
Gene_ID	Peak_Number	negLog_10_qVal	Fold_Enrich	Distance_to_ATG	annotation
NCU01044	R3NCU07392_peak_3672	21.6652	6.09022	0	"spray, sp"
NCU00230	R3NCU07392_peak_2272	11.4113	4.24153	1	protein kinase lkh1
NCU06301	R3NCU07392_peak_2958	10.2264	3.72517	2	hypothetical protein
NCU02437	R1NCU07392_peak_868	31.4405	7.16153	3	histone H2A
NCU03376	R3NCU07392_peak_1367	10.0959	3.98687	4	hypothetical protein
NCU00351	R3NCU07392_peak_2338	12.81	4.70564	6	cript family protein
NCU08001	R3NCU07392_peak_3073	18.56	5.47979	6	vacuolar protein-sorting protein bro-1
NCU08158	R3NCU07392_peak_5214	21.493	6.16182	6	dual specificity phosphatase
NCU07693	R3NCU07392_peak_2862	25.141	6.28786	7	stu-1
NCU10143	R3NCU07392_peak_3956	19.734	5.97282	7	ATPase type 13A2
NCU02994	R1NCU07392_peak_171	12.385	4.29257	10	hypothetical protein
NCU01779	R3NCU07392_peak_1587	20.2537	5.89273	10	HIRA-interacting protein 5
NCU08741	R3NCU07392_peak_1781	17.4544	5.47097	11	striatin Pro11
NCU01410	R3NCU07392_peak_3849	18.7646	5.65847	11	DUF1711 domain-containing protein
NCU09221	R3NCU07392_peak_807	12.838	4.61206	11	HIT finger domain-containing protein
NCU01686	R3NCU07392_peak_1630	12.1934	4.31179	12	hypothetical protein
NCU00411	R3NCU07392_peak_2369	6.37488	3.33765	12	hypothetical protein
NCU07828	R3NCU07392_peak_2005	9.09499	3.82261	13	hypothetical protein
NCU07543	R3NCU07392_peak_2460	15.5797	5.20052	13	hypothetical protein
NCU05175	R3NCU07392_peak_3319	12.3742	4.65991	13	hypothetical protein
NCU08033	R3NCU07392_peak_3088	14.6636	4.36691	14	hypothetical protein
NCU05477	R3NCU07392_peak_1483	6.09979	3.16605	17	hypothetical protein
NCU04098	R3NCU07392_peak_3966	27.8205	6.81491	17	monothiol glutaredoxin-5
NCU08514	R3NCU07392_peak_1720	16.3729	5.23532	18	peptidyl-prolyl isomerase cwc-27
NCU08289	R3NCU07392_peak_2900	18.509	5.46465	19	hypothetical protein
NCU02754	R3NCU07392_peak_453	20.7128	5.58073	22	"casein kinase II subunit beta-2, ckb-2"
NCU08983	R1NCU07392_peak_397	82.8425	9.45916	23	"Poly(A) polymerase, un-17"
NCU04910	R3NCU07392_peak_2638	22.7517	6.06024	23	hypothetical protein
NCU05302	R3NCU07392_peak_3273	12.838	4.8242	23	GTP-binding protein Obg
NCU03030	R3NCU07392_peak_1093	12.3649	3.61445	24	tyrosyl-tRNA synthetase
NCU00538	R3NCU07392_peak_1061	32.7978	8.54091	25	PAP/25A associated domain family
NCU06314	R3NCU07392_peak_2950	21.2087	6.47222	27	hypothetical protein
NCU02636	R3NCU07392_peak_397	41.0455	7.74444	28	ubiquitin conjugating enzyme
NCU04259	R3NCU07392_peak_4061	9.35134	3.82519	28	ubiquinone biosynthesis protein
NCU01241	R3NCU07392_peak_3747	18.364	5.64833	29	mitochondrial carrier protein
NCU02564	R1NCU07392_peak_64	9.33959	3.81234	30	cysteine synthase 2
NCU06414	R3NCU07392_peak_2045	12.7967	4.50184	30	hypothetical protein
NCU04027	R3NCU07392_peak_4540	4.6081	2.52658	31	endoglucanase EG-1
NCU04208	R3NCU07392_peak_4026	17.8977	4.90154	34	hypothetical protein
NCU04425	R3NCU07392_peak_3018	16.0934	5.04222	35	hypothetical protein
NCU02754	R1NCU07392_peak_79	73.7682	10.6081	36	"casein kinase II subunit beta-2, ckb-2"
NCU10020	R3NCU07392_peak_4912	16.5861	5.19435	38	methionine synthase
NCU06131	R3NCU07392_peak_4960	8.54738	3.64059	38	hypothetical protein
NCU03610	R3NCU07392_peak_3558	11.0712	4.04877	39	NEDD8-conjugating enzyme UBC12
NCU05602	R1NCU07392_peak_745	13.5204	4.44155	40	hypothetical protein
NCU10270	R3NCU07392_peak_3006	12.9204	4.63896	40	hypothetical protein
NCU10605	R1NCU07392_peak_314	107.612	10.6821	42	hypothetical protein
NCU04541	R3NCU07392_peak_4935	10.7428	3.9483	42	SNF7 family protein
NCU06769	R3NCU07392_peak_1520	8.325	3.20034	43	activator 1 38 kDa subunit
NCU09521	R3NCU07392_peak_1867	13.8861	4.75119	43	ribosome biogenesis protein
NCU06238	R1NCU07392_peak_354	14.5936	4.0577	44	chromatin remodeling complex subunit
NCU05347	R3NCU07392_peak_1441	9.09499	3.82261	46	histone H2A.Z
NCU05287	R3NCU07392_peak_3277	10.2954	3.88985	46	50S ribosomal protein L4
NCU06483	R3NCU07392_peak_2087	19.7343	4.8005	47	F-box and WD repeat-containing protein
NCU08983	R3NCU07392_peak_2422	5.69806	2.80865	47	"Poly(A) polymerase, un-17"
NCU01698	R1NCU07392_peak_264	574.572	41.7282	49	4F5 family protein
NCU03820	R3NCU07392_peak_3639	11.376	4.41737	53	cell cycle checkpoint protein
NCU09288	R3NCU07392_peak_4777	9.987	3.79451	54	hypothetical protein
NCU06864	R3NCU07392_peak_4829	20.5352	5.74579	54	cAMP-independent regulatory protein pac2
NCU05228	R3NCU07392_peak_3301	10.5046	4.03527	56	hypothetical protein
NCU01901	R3NCU07392_peak_273	8.03413	3.54558	57	hypothetical protein
NCU07023	R1NCU07392_peak_541	124.862	16.7724	60	LAlv9 family protein
NCU07306	R3NCU07392_peak_3150	7.04619	3.43055	60	hypothetical protein
NCU05852	R3NCU07392_peak_5272	9.54815	3.73488	60	glucuronan lyase A
NCU07353	R3NCU07392_peak_850	18.6583	5.51031	60	UPF0499 protein
NCU00090	R3NCU07392_peak_2207	3.54709	2.21457	61	pH-response transcription factor pacC/RIM101
NCU05822	R3NCU07392_peak_5258	18.2078	5.48215	66	hypothetical protein
NCU07261	R3NCU07392_peak_3168	9.65158	4.01207	67	"beta-1,4-mannosyltransferase"
NCU11176	R3NCU07392_peak_2273	22.7607	6.57391	69	actin cytoskeleton organization protein App1
NCU06862	R3NCU07392_peak_4827	10.0593	3.38311	70	hypothetical protein
NCU09300	R3NCU07392_peak_4765	4.6278	2.88368	72	RNA Polymerase II CTD phosphatase Fcp1
NCU09282	R3NCU07392_peak_4780	14.1707	4.95202	72	hypothetical protein
NCU03863	R3NCU07392_peak_4448	10.4038	4.00307	73	hypothetical protein
NCU01809	R3NCU07392_peak_1565	10.8459	4.14643	74	AAA family ATPase/60S ribosome export protein Rix7
NCU11209	R3NCU07392_peak_181	6.76509	3.40504	74	vacuolar protein sorting-associated protein Vps28
NCU00095	R3NCU07392_peak_2209	15.3852	4.92496	74	tetratricopeptide repeat protein 1
NCU01814	R3NCU07392_peak_1562	9.13675	3.60949	77	hypothetical protein
NCU08511	R3NCU07392_peak_1725	5.25929	2.59634	77	arrestin domain conatining protein
NCU06530	R3NCU07392_peak_2772	10.7198	4.10414	77	palmitoyl-protein thioesterase
NCU03226	R3NCU07392_peak_669	12.8259	4.17134	77	Y14 protein
NCU08297	R3NCU07392_peak_2895	9.00836	3.71504	79	cell division control protein 3
NCU07367	R3NCU07392_peak_843	15.3351	5.11957	79	proteasome 26S subunit
NCU06238	R3NCU07392_peak_2135	26.8685	5.6427	81	chromatin remodeling complex subunit
NCU08848	R3NCU07392_peak_3348	4.76307	3.00348	81	hypothetical protein
NCU02639	R3NCU07392_peak_401	11.0253	4.11745	81	argininosuccinate synthase
NCU09853	R3NCU07392_peak_4125	7.1703	3.40057	81	hypothetical protein
NCU07505	R3NCU07392_peak_58	14.6161	4.99158	82	hypothetical protein
NCU03099	R3NCU07392_peak_605	12.6736	3.98648	82	RNP domain-containing protein
NCU03148	R3NCU07392_peak_638	14.9514	4.79094	82	nascent polypeptide-associated complex beta subunit
NCU17069	R3NCU07392_peak_4239	13.0921	4.41071	83	hypothetical protein
NCU05612	R3NCU07392_peak_4346	12.653	4.45592	83	hypothetical protein
NCU03956	R3NCU07392_peak_4501	6.78358	3.20361	85	hypothetical protein
NCU03088	R3NCU07392_peak_600	8.50275	3.70316	85	hypothetical protein
NCU02026	R3NCU07392_peak_204	15.3852	4.92496	86	hypothetical protein
NCU09846	R3NCU07392_peak_4121	9.44779	3.85637	86	hypothetical protein
NCU08728	R3NCU07392_peak_1775	15.0767	5.14469	87	mitochondrial ribosomal protein S19
NCU10020	R1NCU07392_peak_838	14.6742	4.58626	88	methionine synthase
NCU06171	R3NCU07392_peak_2104	7.93436	3.66802	89	actin cytoskeleton-regulatory complex protein pan-1
NCU02833	R3NCU07392_peak_1164	7.63884	3.17106	92	C2 domain-containing protein
NCU02780	R3NCU07392_peak_1202	12.6857	4.66312	94	U2 small nuclear ribonucleoprotein B
NCU06468	R3NCU07392_peak_2080	12.4582	4.68895	94	midasin
NCU01947	R3NCU07392_peak_244	4.9466	2.71812	94	hypothetical protein
NCU09230	R3NCU07392_peak_1224	12.9383	4.74895	95	"cysteine-16, cys-16"
NCU01698	R3NCU07392_peak_1627	39.2289	7.8966	95	4F5 family protein
NCU07900	R3NCU07392_peak_2751	14.6867	4.8077	96	hypothetical protein
NCU05603	R3NCU07392_peak_4352	20.0102	5.19563	97	hypothetical protein
NCU00978	R3NCU07392_peak_878	7.58488	3.33207	97	checkpoint protein kinase
NCU09808	R3NCU07392_peak_548	21.7444	5.87996	98	dynamin-1
NCU04463	R3NCU07392_peak_3001	8.57102	3.57468	103	non-repetitive nucleoporin
NCU09571	R3NCU07392_peak_4878	18.509	5.46465	103	tRNA (adenine-N(1)-)-methyltransferase non-catalytic subunit trm6
NCU07972	R3NCU07392_peak_2725	14.1344	4.83335	105	hypothetical protein
NCU09647	R3NCU07392_peak_2574	17.3175	5.31515	107	hypothetical protein
NCU00825	R3NCU07392_peak_947	11.9796	4.62705	107	hypothetical protein
NCU01189	R3NCU07392_peak_3725	8.30992	3.71796	108	hypothetical protein
NCU00279	R3NCU07392_peak_2299	5.08762	2.93152	109	hypothetical protein
NCU07764	R3NCU07392_peak_3367	10.9227	4.26282	110	hypothetical protein
NCU10605	R3NCU07392_peak_1916	40.1671	7.64641	111	hypothetical protein
NCU00598	R3NCU07392_peak_1038	9.0865	3.99421	113	thioredoxin
NCU00006	R3NCU07392_peak_2166	15.4038	5.25758	114	hypothetical protein
NCU00512	R3NCU07392_peak_1070	18.815	5.67506	116	hypothetical protein
NCU06713	R3NCU07392_peak_3905	8.459	3.61192	118	vacuolar protein sorting protein 55
NCU00006	R1NCU07392_peak_361	10.8541	4.18494	126	hypothetical protein
NCU05603	R1NCU07392_peak_744	11.0529	3.85667	127	hypothetical protein
NCU06174	R3NCU07392_peak_2107	26.9736	6.82223	127	DUF1649 domain-containing protein
NCU08126	R3NCU07392_peak_5201	10.7122	3.86329	127	D-lactate dehydrogenase
NCU01804	R3NCU07392_peak_1570	22.8062	6.19555	128	nudix/MutT family protein
NCU06465	R3NCU07392_peak_2075	8.68687	3.35227	129	SUR2
NCU01914	R3NCU07392_peak_266	8.50179	3.87306	129	sorting nexin-3
NCU05589	R3NCU07392_peak_4359	8.70162	3.9466	129	sip-5
NCU06011	R3NCU07392_peak_4625	6.78358	3.20361	130	multidrug resistance protein 3
NCU08712	R3NCU07392_peak_1768	11.4093	3.92123	132	hypothetical protein
NCU03937	R3NCU07392_peak_4487	16.308	5.32682	132	intermediate filament protein
NCU01844	R3NCU07392_peak_1544	23.4051	6.64736	133	hypothetical protein
NCU07567	R3NCU07392_peak_2446	8.71842	3.77659	133	T-complex protein 1 subunit theta
NCU03133	R3NCU07392_peak_631	9.55442	3.73755	133	hypothetical protein
NCU00651	R3NCU07392_peak_1011	29.9613	6.47004	134	peptide N-glycanase-1
NCU02790	R3NCU07392_peak_1193	12.653	4.45592	135	hypothetical protein
NCU06286	R3NCU07392_peak_2965	13.9586	4.18226	135	hypothetical protein
NCU16784	R1NCU07392_peak_478	13.6495	4.39372	137	hypothetical protein
NCU00589	R3NCU07392_peak_1042	8.88557	3.75235	139	auxin Efflux Carrier superfamily
NCU07760	R3NCU07392_peak_3372	16.7606	5.60317	141	endoglucanase IV
NCU01257	R3NCU07392_peak_3758	11.2393	4.18421	141	hypothetical protein
NCU08965	R3NCU07392_peak_4113	19.2983	5.0976	141	hypothetical protein
NCU06789	R3NCU07392_peak_1513	9.85586	3.82991	143	hypothetical protein
NCU01964	R3NCU07392_peak_239	8.88557	3.75235	143	RING-9 protein
NCU16784	R3NCU07392_peak_2868	23.1468	6.17743	144	hypothetical protein
NCU00605	R3NCU07392_peak_1035	9.65158	3.62714	145	ThiF domain-containing protein
NCU03461	R3NCU07392_peak_1344	13.8277	5.05933	145	hypothetical protein
NCU05720	R3NCU07392_peak_1944	13.2623	4.21533	146	chitin synthase export chaperone
NCU02532	R3NCU07392_peak_346	10.3325	3.62407	146	NEDD8-activating enzyme E1 catalytic subunit
NCU02975	R1NCU07392_peak_176	21.6277	5.58853	147	hypothetical protein
NCU04014	R3NCU07392_peak_4531	24.8202	6.08686	147	hypothetical protein
NCU01804	R1NCU07392_peak_253	22.1699	5.62859	148	nudix/MutT family protein
NCU04024	R3NCU07392_peak_4539	12.1386	4.68637	148	hypothetical protein
NCU10518	R3NCU07392_peak_4246	12.6467	4.45277	151	general stress response protein Whi2
NCU07724	R3NCU07392_peak_2843	11.9973	4.33866	152	mitochondrial division protein 1
NCU01206	R3NCU07392_peak_3734	13.5101	4.63307	154	"set-domain histone methyltransferase-1, set-1"
NCU05570	R3NCU07392_peak_4380	10.9031	3.9979	154	hypothetical protein
NCU06833	R3NCU07392_peak_1500	12.653	4.45592	155	hypothetical protein
NCU05250	R3NCU07392_peak_3292	6.95637	3.13699	156	hypothetical protein
NCU04996	R3NCU07392_peak_4752	11.0201	4.39363	159	hypothetical protein
NCU08633	R3NCU07392_peak_1246	8.50275	3.14708	160	cactin
NCU07526	R3NCU07392_peak_2470	13.0139	4.00664	161	hypothetical protein
NCU01318	R3NCU07392_peak_3794	16.1759	4.96639	161	protein transporter sec-23
NCU02611	R3NCU07392_peak_381	12.9783	4.37704	161	multiple RNA-binding domain-containing protein 1
NCU16802	R3NCU07392_peak_2990	7.31156	3.3104	163	hypothetical protein
NCU09553	R3NCU07392_peak_3936	15.2621	4.69863	164	3-hydroxybutyryl CoA dehydrogenase
NCU09407	R3NCU07392_peak_4902	10.8125	3.8232	164	patatin family phospholipase
NCU06500	R3NCU07392_peak_2099	31.1891	7.27018	167	cell division control protein 25
NCU05945	R3NCU07392_peak_4657	7.0494	3.51035	167	hypothetical protein
NCU06932	R3NCU07392_peak_4867	14.8521	5.0705	167	F-box domain-containing protein
NCU05892	R3NCU07392_peak_5290	18.6068	5.49501	167	hypothetical protein
NCU00564	R3NCU07392_peak_1054	12.9567	4.552	169	mitochondrial 40S ribosomal protein MRP2
NCU09302	R3NCU07392_peak_4762	39.9346	8.97023	171	WD repeat-containing protein
NCU05717	R3NCU07392_peak_1941	12.419	4.38115	174	37S ribosomal protein Mrp17
NCU01935	R3NCU07392_peak_255	33.7226	7.33155	174	palmitoyltransferase PFA5
NCU07399	R3NCU07392_peak_825	10.9602	4.27529	174	serine/threonine kinase 16
NCU01779	R1NCU07392_peak_257	54.993	9.79981	176	HIRA-interacting protein 5
NCU07298	R3NCU07392_peak_3155	9.65158	3.62714	176	CAIB/BAIF family enzyme
NCU01180	R3NCU07392_peak_3720	8.84356	3.28455	176	ubiquitin C-terminal hydrolase
NCU07990	R3NCU07392_peak_3067	10.2811	4.13745	177	hypothetical protein
NCU05577	R3NCU07392_peak_4374	18.4605	5.44959	180	beta-glucosidase
NCU03887	R3NCU07392_peak_4464	22.1953	5.48973	180	CreD
NCU03045	R3NCU07392_peak_1081	14.5343	4.25828	181	cellular morphogenesis protein
NCU08795	R3NCU07392_peak_2543	10.9908	3.87339	181	Ser/Thr protein phosphatase
NCU01858	R3NCU07392_peak_291	9.45471	3.9431	181	chromosome segregation in meiosis protein 3
NCU03065	R3NCU07392_peak_587	11.9907	4.1647	181	mitotic control protein dis3
NCU01445	R3NCU07392_peak_3952	10.347	4.35664	183	hypothetical protein
NCU09871	R3NCU07392_peak_4434	9.05148	3.98188	183	centrin 3
NCU00752	R3NCU07392_peak_968	8.53833	3.43108	183	hypothetical protein
NCU09611	R3NCU07392_peak_1289	7.05402	3.22794	184	fructosamine-3-kinase
NCU04810	R3NCU07392_peak_4288	15.0357	4.8165	186	serine/threonine-protein phosphatase 2A activator 1
NCU01761	R3NCU07392_peak_1598	16.0934	5.04222	187	hypothetical protein
NCU00605	R1NCU07392_peak_158	18.1718	4.65757	188	ThiF domain-containing protein
NCU08012	R3NCU07392_peak_3079	25.2877	6.44936	188	exocyst complex protein EXO70
NCU03245	R3NCU07392_peak_684	11.5785	3.70565	189	hypothetical protein
NCU00652	R3NCU07392_peak_1010	8.84356	3.28455	191	hypothetical protein
NCU06126	R3NCU07392_peak_4962	15.8133	4.43949	193	hypothetical protein
NCU03007	R3NCU07392_peak_1104	6.64709	3.44035	194	pre-mRNA-splicing factor slt-11
NCU01907	R3NCU07392_peak_271	10.7198	4.10414	194	syntaxin 5
NCU05237	R3NCU07392_peak_3296	12.419	4.38115	194	hypothetical protein
NCU10039	R3NCU07392_peak_3329	24.2441	6.78302	194	hypothetical protein
NCU08748	R3NCU07392_peak_1787	21.6093	6.19883	195	hypothetical protein
NCU06467	R1NCU07392_peak_339	240.223	20.9058	199	hypothetical protein
NCU06467	R3NCU07392_peak_2077	32.7099	6.52333	199	hypothetical protein
NCU08806	R3NCU07392_peak_3248	16.8654	5.63991	199	hypothetical protein
NCU17066	R3NCU07392_peak_4227	15.2451	5.08927	199	hypothetical protein
NCU04991	R3NCU07392_peak_4756	12.6271	4.27148	199	oligopeptide transporter
NCU12067	R3NCU07392_peak_4187	12.653	4.45592	200	hypothetical protein
NCU00105	R3NCU07392_peak_2213	25.989	5.97988	202	60S ribosome subunit biogenesis protein NIP7
NCU16676	R3NCU07392_peak_2309	7.55621	3.4588	202	hypothetical protein
NCU01245	R3NCU07392_peak_3748	10.5743	4.05702	202	hypothetical protein
NCU00904	R3NCU07392_peak_912	21.7288	5.98947	202	D-lactate dehydrogenase
NCU00438	R3NCU07392_peak_2389	11.9259	4.06662	203	adenosine deaminase
NCU03685	R3NCU07392_peak_3584	13.8439	4.73777	203	hypothetical protein
NCU16904	R3NCU07392_peak_3328	24.4132	7.64896	204	hypothetical protein
NCU03826	R3NCU07392_peak_3643	20.5352	5.74579	204	elongation factor 1-gamma
NCU16382	R3NCU07392_peak_565	9.56834	3.81763	204	hypothetical protein
NCU02618	R3NCU07392_peak_385	12.382	4.36943	205	peroxisomal membrane protein
NCU04251	R3NCU07392_peak_4054	22.1953	5.48973	205	chitin synthase 3
NCU09578	R3NCU07392_peak_4874	13.312	4.56995	206	hypothetical protein
NCU01073	R3NCU07392_peak_3684	13.8989	4.31336	207	hypothetical protein
NCU00538	R1NCU07392_peak_163	15.183	5.12591	209	PAP/25A associated domain family
NCU01323	R3NCU07392_peak_3799	15.8077	4.67661	210	cohesin complex subunit
NCU02467	R3NCU07392_peak_311	19.2983	5.0976	215	U2 snRNP component IST3
NCU01273	R3NCU07392_peak_3769	12.5342	4.41667	215	beta-taxilin
NCU08065	R3NCU07392_peak_34	16.1109	5.26322	216	hypothetical protein
NCU04272	R3NCU07392_peak_4066	11.2079	4.26389	220	ZZ type zinc finger domain-containing protein
NCU09024	R3NCU07392_peak_4803	7.0494	3.51035	221	hypothetical protein
NCU00876	R3NCU07392_peak_930	28.144	6.90929	221	ferric reductase transmembrane component
NCU03826	R1NCU07392_peak_630	22.0023	5.58553	222	elongation factor 1-gamma
NCU11406	R3NCU07392_peak_1872	16.2588	5.31078	223	MOSC domain-containing protein
NCU02043	R3NCU07392_peak_196	23.0945	6.04572	225	UPF0326 protein hag1
NCU08573	R3NCU07392_peak_2516	11.8292	4.68364	225	hypothetical protein
NCU06190	R3NCU07392_peak_2115	15.8574	4.60745	226	hypothetical protein
NCU07007	R3NCU07392_peak_3215	8.88557	3.75235	226	"submerged protoperithecia-2, sub-2"
NCU07633	R3NCU07392_peak_2608	9.12028	4.00662	228	hypothetical protein
NCU00653	R3NCU07392_peak_1010	8.84356	3.28455	229	hypothetical protein
NCU04815	R3NCU07392_peak_4290	10.1457	3.84434	230	lactoylglutathione lyase
NCU10077	R3NCU07392_peak_4095	4.94871	3.15765	231	hypothetical protein
NCU07112	R3NCU07392_peak_4185	12.653	4.45592	231	hypothetical protein
NCU05605	R3NCU07392_peak_4351	18.0958	5.23629	232	hypothetical protein
NCU11324	R3NCU07392_peak_776	5.24594	2.71805	232	PX domain-containing protein
NCU03728	R3NCU07392_peak_3599	11.4837	4.2649	234	hypothetical protein
NCU08012	R1NCU07392_peak_518	219.628	23.0662	236	exocyst complex protein EXO70
NCU17268	R3NCU07392_peak_5229	34.6014	8.13596	236	hypothetical protein
NCU09900	R3NCU07392_peak_533	12.6474	4.64912	239	hypothetical protein
NCU00930	R3NCU07392_peak_897	15.8574	4.60745	239	"translocase of inner mitochondrial membrane 10, tim10"
NCU00902	R3NCU07392_peak_914	11.8461	3.90106	240	white collar-2
NCU08463	R3NCU07392_peak_1743	9.09499	3.82261	241	hypothetical protein
NCU02425	R3NCU07392_peak_5093	7.46407	2.85057	241	PH domain-containing protein
NCU03503	R3NCU07392_peak_1328	11.0987	4.42101	242	"mannosyltransferase, cot-5"
NCU00796	R3NCU07392_peak_953	24.5151	6.59654	242	hydantoinase
NCU02864	R3NCU07392_peak_1151	14.3222	4.79158	244	hypothetical protein
NCU00396	R3NCU07392_peak_2361	5.41467	3.12031	244	pre-mRNA-splicing factor rse-1
NCU08346	R3NCU07392_peak_771	13.2835	4.07708	244	serine/threonine protein kinase
NCU01801	R3NCU07392_peak_1571	17.5748	5.28743	246	hypothetical protein
NCU04638	R3NCU07392_peak_3502	14.0206	4.60361	246	hypothetical protein
NCU03728	R1NCU07392_peak_619	35.2145	7.15257	247	hypothetical protein
NCU06234	R3NCU07392_peak_2134	11.3424	4.40406	248	hypothetical protein
NCU07396	R3NCU07392_peak_827	9.54279	4.06444	248	hypothetical protein
NCU01382	R1NCU07392_peak_658	371.4	31.4177	250	hypothetical protein
NCU01902	R3NCU07392_peak_272	8.40866	3.52397	250	glucosamine 6-phosphate N-acetyltransferase
NCU16877	R3NCU07392_peak_3238	9.57805	4.17518	250	hypothetical protein
NCU16404	R3NCU07392_peak_764	6.21765	3.27893	250	hypothetical protein
NCU00075	R1NCU07392_peak_366	16.9969	4.68686	251	mitochondrial import inner membrane translocase subunit tim-14
NCU09571	R1NCU07392_peak_834	7.9441	3.47411	251	tRNA (adenine-N(1)-)-methyltransferase non-catalytic subunit trm6
NCU05152	R1NCU07392_peak_792	39.1588	8.02244	252	hypothetical protein
NCU00513	R3NCU07392_peak_1067	11.8722	4.69914	252	phosphotransferase enzyme family domain-containing protein
NCU00270	R3NCU07392_peak_2289	8.92091	3.6861	252	hypothetical protein
NCU01301	R3NCU07392_peak_3786	28.8508	6.6208	252	60S ribosomal subunit assembly/export protein loc-1
NCU01016	R3NCU07392_peak_3662	5.71664	3.03164	254	hypothetical protein
NCU03047	R3NCU07392_peak_1079	13.2623	4.37514	255	hypothetical protein
NCU09294	R3NCU07392_peak_4771	15.2621	4.69863	255	hypothetical protein
NCU10035	R3NCU07392_peak_1712	19.02	5.20635	256	hypothetical protein
NCU00075	R3NCU07392_peak_2200	17.7767	5.14303	256	mitochondrial import inner membrane translocase subunit tim-14
NCU01859	R3NCU07392_peak_291	9.45471	3.9431	256	NADH:ubiquinone oxidoreductase 20.9kD subunit
NCU09530	R3NCU07392_peak_3921	18.6686	5.20301	256	hypothetical protein
NCU17073	R1NCU07392_peak_722	63.0071	10.1367	258	hypothetical protein
NCU05386	R3NCU07392_peak_1451	13.8989	4.31336	258	hypothetical protein
NCU08227	R3NCU07392_peak_2497	10.8205	4.53446	258	hypothetical protein
NCU04243	R3NCU07392_peak_4044	11.3424	4.40406	258	U3 small nucleolar ribonucleoprotein IMP4
NCU04750	R3NCU07392_peak_4248	9.08943	3.52911	258	hypothetical protein
NCU05605	R1NCU07392_peak_743	21.0354	5.25044	260	hypothetical protein
NCU05712	R3NCU07392_peak_1936	25.6994	6.57012	261	hypothetical protein
NCU05120	R3NCU07392_peak_4700	14.6867	4.8077	261	DNA-dependent RNA polymerase II RPB140
NCU01772	R3NCU07392_peak_1592	7.62115	3.63783	262	DNA-directed RNA polymerase III polypeptide
NCU04387	R3NCU07392_peak_3030	11.3111	4.20695	264	vacuolar membrane ATPase-7
NCU07793	R3NCU07392_peak_3358	22.8448	6.46384	265	hypothetical protein
NCU05152	R3NCU07392_peak_4683	45.7302	9.73187	266	hypothetical protein
NCU04824	R3NCU07392_peak_4294	10.8125	3.8232	267	hypothetical protein
NCU00738	R3NCU07392_peak_974	9.53747	3.52953	268	hypothetical protein
NCU01535	R3NCU07392_peak_1687	13.6693	4.58714	270	hypothetical protein
NCU08220	R1NCU07392_peak_409	11.6047	4.07571	271	hypothetical protein
NCU00490	R3NCU07392_peak_2411	9.08943	3.52911	271	DUF803 domain membrane protein
NCU08237	R3NCU07392_peak_2502	17.2046	5.50665	272	hypothetical protein
NCU01389	R3NCU07392_peak_3834	8.82057	3.89768	273	mitogen-activated protein kinase organizer 1
NCU05766	R1NCU07392_peak_890	37.9765	7.59197	275	hypothetical protein
NCU10730	R3NCU07392_peak_1743	9.09499	3.82261	275	hypothetical protein
NCU01303	R3NCU07392_peak_3788	17.0643	5.0336	275	hypothetical protein
NCU01382	R3NCU07392_peak_3827	29.1262	6.81369	275	hypothetical protein
NCU02364	R3NCU07392_peak_5113	10.5321	4.13037	277	C2H2 finger domain-containing protein
NCU00876	R1NCU07392_peak_144	21.198	5.47718	279	ferric reductase transmembrane component
NCU00272	R3NCU07392_peak_2292	19.0366	5.30786	279	ubiquitin ligase subunit CulD
NCU03479	R3NCU07392_peak_1339	8.59023	4.0004	280	endoribonuclease ysh-1
NCU07214	R3NCU07392_peak_4156	13.5034	4.94618	281	hypothetical protein
NCU01762	R3NCU07392_peak_1598	16.0934	5.04222	282	nucleolar RNAse III
NCU05618	R3NCU07392_peak_4344	16.8115	5.15948	284	extracellular SCP domain-containing protein Pry1
NCU00662	R3NCU07392_peak_1006	17.1253	4.62069	285	RNA binding protein
NCU09239	R3NCU07392_peak_1222	8.13458	2.89102	286	"proliferating cell nuclear antigen, pcn"
NCU02811	R3NCU07392_peak_1173	8.15667	3.26166	287	hypothetical protein
NCU01587	R3NCU07392_peak_1668	12.6505	4.27905	287	cofilin
NCU08748	R1NCU07392_peak_294	13.0332	4.47787	288	hypothetical protein
NCU17073	R3NCU07392_peak_4256	13.3194	4.57318	288	hypothetical protein
NCU02474	R3NCU07392_peak_314	8.40005	2.98962	289	"translocase of outer mitochondrial membrane 5, tom5"
NCU06750	R3NCU07392_peak_1528	11.6333	4.31242	290	coiled-coil domain-containing protein 25
NCU05766	R3NCU07392_peak_5230	25.4914	6.63496	295	hypothetical protein
NCU02200	R3NCU07392_peak_5188	13.2693	4.37827	296	phosphatidylinositol transfer protein sfh-5
NCU06500	R1NCU07392_peak_346	9.21839	3.45005	297	cell division control protein 25
NCU05935	R3NCU07392_peak_4666	15.6644	4.81475	297	hypothetical protein
NCU07078	R3NCU07392_peak_4199	26.3684	7.19043	298	hypothetical protein
NCU09352	R3NCU07392_peak_1820	11.577	4.3882	300	far upstream element-binding protein 2
NCU00424	R3NCU07392_peak_2381	7.87235	3.64657	300	Spo76 protein
NCU00478	R3NCU07392_peak_2407	5.36027	3.09941	301	hypothetical protein
NCU05074	R3NCU07392_peak_4714	15.3852	4.92496	301	hypothetical protein
NCU00616	R3NCU07392_peak_1028	10.2811	4.13745	302	hypothetical protein
NCU00388	R3NCU07392_peak_2356	7.89939	3.83207	303	hypothetical protein
NCU01548	R3NCU07392_peak_1679	13.3194	4.57318	304	hypothetical protein
NCU02211	R3NCU07392_peak_5187	22.4201	6.32797	304	hypothetical protein
NCU01936	R3NCU07392_peak_254	13.9586	4.18226	305	sister chromatid cohesion protein Eso1
NCU01408	R3NCU07392_peak_3846	18.237	5.27731	306	"COP9 signalosome-3, csn-3"
NCU16512	R3NCU07392_peak_1347	18.2756	5.39401	307	hypothetical protein
NCU08745	R3NCU07392_peak_1783	8.15667	3.26166	307	hypothetical protein
NCU04457	R3NCU07392_peak_3005	16.308	5.32682	307	DUF803 domain membrane protein
NCU04206	R3NCU07392_peak_4024	11.9593	4.73047	308	hypothetical protein
NCU09029	R3NCU07392_peak_4805	7.30738	3.60595	308	hypothetical protein
NCU04943	R3NCU07392_peak_2656	15.3852	4.92496	312	V-SNARE protein Bos1
NCU04199	R3NCU07392_peak_4023	13.2727	4.55753	312	hypothetical protein
NCU02191	R3NCU07392_peak_5192	26.9296	7.07998	312	hypothetical protein
NCU01970	R3NCU07392_peak_237	17.1253	4.62069	313	DUF718 domain-containing protein
NCU07728	R3NCU07392_peak_2840	8.59519	3.73428	315	"siderophore regulation, sre"
NCU08989	R3NCU07392_peak_2424	19.512	5.66164	318	ADP-ribosylation factor 1
NCU01300	R3NCU07392_peak_3786	28.8508	6.6208	319	imidazoleglycerol-phosphate dehydratase
NCU07610	R3NCU07392_peak_2597	14.6973	5.25135	322	taurine dioxygenase
NCU07342	R3NCU07392_peak_3133	31.5693	7.51653	322	hypothetical protein
NCU01421	R3NCU07392_peak_3855	13.3336	3.95831	324	hypothetical protein
NCU02219	R3NCU07392_peak_5183	7.84533	3.63594	325	hypothetical protein
NCU07534	R3NCU07392_peak_2466	8.97573	3.63076	326	RNA-dependent RNA polymerase
NCU09712	R1NCU07392_peak_840	127.043	14.318	327	hypothetical protein
NCU09712	R3NCU07392_peak_4921	27.021	6.24589	327	hypothetical protein
NCU03101	R3NCU07392_peak_606	20.2219	5.44225	328	hypothetical protein
NCU05664	R3NCU07392_peak_1915	6.31064	3.11005	329	hypothetical protein
NCU06761	R3NCU07392_peak_1521	17.9766	5.30349	333	sphingosine-1-phosphate lyase
NCU02677	R3NCU07392_peak_416	13.8732	4.64913	333	"arginine-3, arg-3"
NCU16594	R3NCU07392_peak_1818	23.7335	5.79493	335	hypothetical protein
NCU07647	R3NCU07392_peak_2616	30.579	8.12795	335	hypothetical protein
NCU07681	R3NCU07392_peak_2867	12.3323	4.26762	339	vacuolar ATPase subunit E
NCU11286	R1NCU07392_peak_406	16.1234	4.63091	344	hypothetical protein
NCU03681	R3NCU07392_peak_3583	13.439	4.70941	344	hypothetical protein
NCU05082	R3NCU07392_peak_4711	6.78358	3.20361	345	hypothetical protein
NCU07438	R3NCU07392_peak_88	14.67	3.91241	346	WASP-like protein las17p
NCU06966	R3NCU07392_peak_3185	27.0062	6.58115	348	hypothetical protein
NCU09295	R3NCU07392_peak_4770	22.8244	6.59491	349	hypothetical protein
NCU03669	R3NCU07392_peak_3577	8.91846	3.93332	350	AdoMet-dependent rRNA methyltransferase spb1
NCU02169	R3NCU07392_peak_130	21.2157	6.20001	355	hypothetical protein
NCU00319	R1NCU07392_peak_385	15.2535	4.14107	356	hypothetical protein
NCU02945	R1NCU07392_peak_180	13.8497	4.44773	357	hypothetical protein
NCU05795	R1NCU07392_peak_895	58.2281	9.57792	357	hypothetical protein
NCU05795	R3NCU07392_peak_5242	41.6454	8.69618	357	hypothetical protein
NCU02009	R3NCU07392_peak_214	9.66803	3.93115	358	FreB
NCU02118	R3NCU07392_peak_156	12.072	3.89588	359	palmitoyltransferase PFA4
NCU07506	R3NCU07392_peak_57	11.7325	4.43998	359	fumarylacetoacetate hydrolase
NCU09617	R3NCU07392_peak_1287	5.96244	3.25791	361	hypothetical protein
NCU00814	R3NCU07392_peak_950	9.54815	3.73488	361	hypothetical protein
NCU05343	R3NCU07392_peak_1440	15.622	4.80253	362	R3H domain-containing protein
NCU09689	R3NCU07392_peak_3416	12.0152	4.01926	364	hypothetical protein
NCU02627	R3NCU07392_peak_391	30.034	6.94343	364	hypothetical protein
NCU00597	R3NCU07392_peak_1038	9.0865	3.99421	366	deoxyribose-phosphate aldolase 2
NCU02261	R3NCU07392_peak_5164	12.4468	3.99394	366	hypothetical protein
NCU06927	R3NCU07392_peak_4859	18.784	5.78652	367	abhydrolase domain containing 12
NCU02261	R1NCU07392_peak_882	16.5373	4.42841	368	hypothetical protein
NCU00037	R3NCU07392_peak_2185	42.7364	8.42581	368	polyadenylation factor subunit 2
NCU02246	R3NCU07392_peak_5172	28.7231	6.07032	368	hypothetical protein
NCU02945	R3NCU07392_peak_1131	8.78281	3.79811	369	hypothetical protein
NCU03932	R3NCU07392_peak_4486	11.9973	4.33866	369	hypothetical protein
NCU00387	R3NCU07392_peak_2355	17.2539	5.40698	370	3-oxo-5-alpha-steroid 4-dehydrogenase
NCU11314	R1NCU07392_peak_349	322.189	27.849	373	CaaX prenyl proteinase Rce1
NCU09099	R3NCU07392_peak_110	11.4093	3.92123	374	hypothetical protein
NCU04189	R1NCU07392_peak_684	77.7109	10.9116	375	glucan synthesis regulatory protein
NCU00319	R3NCU07392_peak_2319	23.6916	5.68579	377	hypothetical protein
NCU16364	R3NCU07392_peak_347	16.4656	4.53009	378	hypothetical protein
NCU05453	R3NCU07392_peak_1476	10.749	3.95112	379	ER to Golgi transporter
NCU10273	R3NCU07392_peak_3103	7.72827	3.51783	379	Hsc70 cochaperone
NCU01386	R3NCU07392_peak_3831	24.0224	5.97581	379	hypothetical protein
NCU05764	R3NCU07392_peak_5229	34.6014	8.13596	380	hypothetical protein
NCU08603	R3NCU07392_peak_1234	18.3118	5.40493	382	ankyrin repeat protein
NCU04974	R1NCU07392_peak_448	13.829	4.36089	383	hypothetical protein
NCU16460	R3NCU07392_peak_1073	19.9658	5.4713	383	hypothetical protein
NCU09632	R3NCU07392_peak_1283	11.3545	4.2214	384	hypothetical protein
NCU04138	R3NCU07392_peak_3994	18.2167	5.37555	384	hypothetical protein
NCU01713	R3NCU07392_peak_1621	13.9059	4.16768	385	tubulin-folding cofactor B
NCU01015	R3NCU07392_peak_3662	5.71664	3.03164	386	hypothetical protein
NCU00273	R3NCU07392_peak_2294	4.90815	2.43341	389	hypothetical protein
NCU02360	R3NCU07392_peak_5115	11.6938	4.42692	389	transmembrane protein UsgS
NCU16766	R3NCU07392_peak_2790	9.65158	4.01207	390	hypothetical protein
NCU05559	R3NCU07392_peak_4383	10.1511	4.00589	390	hypothetical protein
NCU04020	R3NCU07392_peak_4535	10.6693	4.36869	390	lysyl-tRNA synthetase
NCU05761	R1NCU07392_peak_889	14.6511	4.76048	391	hypothetical protein
NCU10014	R3NCU07392_peak_4907	9.57088	4.91474	392	hypothetical protein
NCU09252	R3NCU07392_peak_1219	9.77302	3.53347	393	hypothetical protein
NCU11286	R3NCU07392_peak_2488	24.9166	6.34114	393	hypothetical protein
NCU08052	R3NCU07392_peak_25	14.7164	5.13888	393	aquaporin
NCU02386	R3NCU07392_peak_5108	12.7698	4.40203	393	hypothetical protein
NCU08699	R3NCU07392_peak_1759	16.5282	4.70548	394	bli-4 protein
NCU04139	R3NCU07392_peak_3994	18.2167	5.37555	395	hypothetical protein
NCU02640	R3NCU07392_peak_401	11.0253	4.11745	395	hypothetical protein
NCU00395	R3NCU07392_peak_2361	5.41467	3.12031	396	mRNA processing protein
NCU09432	R3NCU07392_peak_4785	11.8549	4.58353	396	SNARE-dependent exocytosis protein
NCU05606	R1NCU07392_peak_743	21.0354	5.25044	397	glucosidase 2 subunit beta
NCU00412	R3NCU07392_peak_2370	6.19142	3.26934	397	hypothetical protein
NCU03960	R3NCU07392_peak_4503	20.7307	5.29367	397	hypothetical protein
NCU01211	R3NCU07392_peak_3737	20.5157	5.5245	398	hypothetical protein
NCU11314	R3NCU07392_peak_2118	27.7976	6.56557	399	CaaX prenyl proteinase Rce1
NCU11172	R1NCU07392_peak_377	28.7344	5.86509	400	hypothetical protein
NCU06842	R3NCU07392_peak_1492	26.0671	6.43373	401	RCM-1
NCU02343	R3NCU07392_peak_5125	19.8619	5.65538	401	alpha-L-arabinofuranosidase 2
NCU16787	R3NCU07392_peak_2873	11.3424	4.40406	404	hypothetical protein
NCU10498	R3NCU07392_peak_431	8.14973	3.5837	405	60S ribosomal protein L35
NCU05260	R3NCU07392_peak_3289	28.6762	6.35632	406	protein kinase domain-containing protein
NCU04632	R3NCU07392_peak_3504	9.89025	3.91997	406	hypothetical protein
NCU00822	R3NCU07392_peak_948	11.9259	4.06662	407	hypothetical protein
NCU06587	R3NCU07392_peak_2799	7.35843	3.71466	408	hypothetical protein
NCU09981	R3NCU07392_peak_305	20.7307	5.29367	408	hypothetical protein
NCU00832	R3NCU07392_peak_942	13.2623	4.21533	408	hypothetical protein
NCU07878	R3NCU07392_peak_2030	12.419	4.38115	409	hypothetical protein
NCU06749	R3NCU07392_peak_1528	11.6333	4.31242	410	60S ribosomal protein L3
NCU01731	R3NCU07392_peak_1612	10.2696	3.96093	410	"velvetA-like-1, ve-1"
NCU02042	R3NCU07392_peak_197	8.06625	3.48391	410	hypothetical protein
NCU02066	R3NCU07392_peak_181	6.76509	3.40504	412	ribosome assembly protein Noc2
NCU00492	R3NCU07392_peak_2412	14.0816	3.83859	412	hypothetical protein
NCU10003	R3NCU07392_peak_1910	10.9028	3.71467	413	HET domain-containing protein
NCU07827	R3NCU07392_peak_2004	18.7136	5.41879	414	hypothetical protein
NCU08220	R3NCU07392_peak_2493	20.9768	5.76467	414	hypothetical protein
NCU01317	R3NCU07392_peak_3793	13.2693	4.37827	415	60S ribosomal protein L12
NCU04159	R3NCU07392_peak_4003	9.05148	3.98188	418	DUF652 domain-containing protein
NCU01509	R3NCU07392_peak_1695	15.2878	5.10438	421	hypothetical protein
NCU01344	R3NCU07392_peak_3810	6.09132	3.23154	422	hypothetical protein
NCU03242	R3NCU07392_peak_681	32.688	7.85409	422	serine/threonine-protein kinase cbk1
NCU00143	R3NCU07392_peak_2235	13.824	4.37161	425	hypothetical protein
NCU05606	R3NCU07392_peak_4351	18.0958	5.23629	425	glucosidase 2 subunit beta
NCU06837	R3NCU07392_peak_1498	16.0857	5.03866	426	hypothetical protein
NCU17051	R1NCU07392_peak_702	22.0023	5.58553	429	hypothetical protein
NCU01653	R3NCU07392_peak_1640	14.4752	4.47328	429	hypothetical protein
NCU02038	R3NCU07392_peak_201	11.7739	4.10067	429	hypothetical protein
NCU04504	R3NCU07392_peak_2983	28.4707	7.28072	429	ATP-dependent rRNA helicase rrp-3
NCU06064	R3NCU07392_peak_4983	10.5355	4.22364	429	hypothetical protein
NCU07761	R3NCU07392_peak_3370	14.6973	5.25135	430	hypothetical protein
NCU03851	R3NCU07392_peak_4443	16.3531	5.01908	430	hypothetical protein
NCU07111	R3NCU07392_peak_4185	12.653	4.45592	431	metallo-beta-lactamase domain-containing protein
NCU08852	R3NCU07392_peak_3346	7.63884	3.17106	432	polymerase 2 ADP-ribosyltransferase 2
NCU06223	R3NCU07392_peak_2130	18.2067	5.84525	433	hypothetical protein
NCU04954	R3NCU07392_peak_2659	10.9028	3.71467	433	hypothetical protein
NCU09362	R3NCU07392_peak_469	12.1773	4.81393	433	hypothetical protein
NCU06933	R3NCU07392_peak_4867	14.8521	5.0705	433	hypothetical protein
NCU09303	R3NCU07392_peak_4762	39.9346	8.97023	436	hypothetical protein
NCU03242	R1NCU07392_peak_109	107.631	14.8634	437	serine/threonine-protein kinase cbk1
NCU09301	R1NCU07392_peak_809	29.7111	5.7338	437	UDP-glucose:sterol glycosyltransferase
NCU00415	R3NCU07392_peak_2375	12.4863	4.49481	439	hypothetical protein
NCU04395	R3NCU07392_peak_3025	20.2419	6.01277	439	"glycosyl hydrolase family 30-1, neg-1"
NCU00031	R3NCU07392_peak_2182	15.3852	4.92496	440	hypothetical protein
NCU06586	R3NCU07392_peak_2797	14.1035	5.16051	440	AN1 zinc finger protein
NCU01466	R3NCU07392_peak_3945	6.16481	3.25981	442	hypothetical protein
NCU00775	R3NCU07392_peak_959	20.2282	5.76595	443	isocitrate dehydrogenase subunit 1
NCU01246	R3NCU07392_peak_3748	10.5743	4.05702	444	urease accessory protein UreD
NCU03711	R3NCU07392_peak_3592	11.2393	4.18421	446	GTP-binding protein ypt7
NCU02683	R3NCU07392_peak_417	13.3521	4.49133	446	hypothetical protein
NCU03174	R3NCU07392_peak_648	9.06458	3.81202	446	hypothetical protein
NCU17271	R3NCU07392_peak_5230	25.4914	6.63496	447	hypothetical protein
NCU08345	R3NCU07392_peak_771	13.2835	4.07708	447	ubiquitin-conjugating enzyme E
NCU08990	R3NCU07392_peak_2424	19.512	5.66164	449	60S ribosomal protein L39
NCU01768	R3NCU07392_peak_1597	8.63655	3.92178	450	hypothetical protein
NCU10762	R3NCU07392_peak_3037	6.09979	3.16605	452	UDP-N-acetyl-glucosamine-1-P transferase Alg7
NCU06135	R3NCU07392_peak_4959	20.2419	6.01277	455	hypothetical protein
NCU03494	R1NCU07392_peak_213	34.9599	6.4723	457	"partner for incompatibility with het-c, pin-c"
NCU10572	R3NCU07392_peak_2570	9.8786	4.28614	457	short chain oxidoreductase
NCU07989	R3NCU07392_peak_3066	10.3325	3.62407	460	AP-2 complex subunit sigma
NCU03504	R3NCU07392_peak_1328	11.0987	4.42101	462	sphingosine-1-phosphate phosphohydrolase
NCU00663	R3NCU07392_peak_1006	17.1253	4.62069	464	hypothetical protein
NCU04834	R3NCU07392_peak_4300	27.1761	5.88911	465	"sensor histidine kinase/response regulator, phy-1"
NCU00491	R3NCU07392_peak_2411	9.08943	3.52911	466	hypothetical protein
NCU08574	R3NCU07392_peak_2516	11.8292	4.68364	466	hypothetical protein
NCU17271	R1NCU07392_peak_890	37.9765	7.59197	467	hypothetical protein
NCU11295	R3NCU07392_peak_2975	10.8125	3.8232	467	hypothetical protein
NCU01547	R3NCU07392_peak_1679	13.3194	4.57318	468	26S proteasome regulatory subunit rpn-8
NCU09471	R3NCU07392_peak_1849	13.3336	4.77826	468	hypothetical protein
NCU00813	R3NCU07392_peak_950	9.54815	3.73488	468	disulfide isomerase
NCU16992	R3NCU07392_peak_3759	7.44794	3.11627	469	pheromone mfa-1
NCU01284	R3NCU07392_peak_3776	21.608	6.07267	470	hypothetical protein
NCU03106	R3NCU07392_peak_611	8.88994	3.67655	471	hypothetical protein
NCU02984	R1NCU07392_peak_174	40.5891	7.86263	472	translation machinery-associated protein 22
NCU05585	R3NCU07392_peak_4363	17.5048	5.4872	472	MFS quinate transporter
NCU07501	R3NCU07392_peak_63	8.88557	3.75235	472	hypothetical protein
NCU04386	R3NCU07392_peak_3030	11.3111	4.20695	478	hypothetical protein
NCU07479	R3NCU07392_peak_77	10.4618	4.19865	478	hypothetical protein
NCU02984	R3NCU07392_peak_1113	16.9878	5.21266	479	translation machinery-associated protein 22
NCU01722	R3NCU07392_peak_1615	8.75728	3.70928	480	hypothetical protein
NCU00280	R3NCU07392_peak_2300	23.7861	6.37102	480	hypothetical protein
NCU04496	R3NCU07392_peak_2986	22.6383	6.26886	480	hypothetical protein
NCU03494	R3NCU07392_peak_1333	33.6239	6.95223	481	"partner for incompatibility with het-c, pin-c"
NCU06838	R3NCU07392_peak_1494	7.61094	3.55307	482	hypothetical protein
NCU09018	R3NCU07392_peak_2437	8.42376	3.39765	482	glutaminyl-peptide cyclotransferase
NCU04670	R3NCU07392_peak_3488	8.66984	3.67952	486	hypothetical protein
NCU07507	R3NCU07392_peak_57	11.7325	4.43998	486	hypothetical protein
NCU00458	R3NCU07392_peak_2399	11.6098	4.49892	487	hypothetical protein
NCU02536	R3NCU07392_peak_347	16.4656	4.53009	488	ubiquinone biosynthesis monooxygenase COQ6
NCU04757	R3NCU07392_peak_4252	11.577	4.3882	488	hypothetical protein
NCU09802	R3NCU07392_peak_543	10.6473	4.26169	489	hypothetical protein
NCU04834	R1NCU07392_peak_732	44.6831	6.62832	490	"sensor histidine kinase/response regulator, phy-1"
NCU01467	R3NCU07392_peak_3945	6.16481	3.25981	490	"NADH:ubiquinone oxidoreductase 10.4kD subunit, nuo10.4"
NCU01420	R3NCU07392_peak_3855	13.3336	3.95831	492	hypothetical protein
NCU03097	R1NCU07392_peak_98	32.8972	6.93019	493	nucleotide-sugar transporter
NCU09870	R3NCU07392_peak_4434	9.05148	3.98188	493	hypothetical protein
NCU03928	R3NCU07392_peak_4479	11.3638	4.05791	494	hypothetical protein
NCU17154	R3NCU07392_peak_4773	17.9605	5.40558	494	hypothetical protein
NCU00439	R3NCU07392_peak_2389	11.9259	4.06662	495	hypothetical protein
NCU04495	R1NCU07392_peak_499	9.7753	3.86331	496	C-type cyclin
NCU05130	R3NCU07392_peak_4695	32.9857	7.65332	498	hypothetical protein
NCU09472	R3NCU07392_peak_1849	13.3336	4.77826	500	hypothetical protein
NCU00457	R3NCU07392_peak_2399	11.6098	4.49892	500	translation initiation factor 4B
NCU07379	R3NCU07392_peak_838	12.6954	4.37904	500	bZIP-type transcription factor
NCU00701	R3NCU07392_peak_988	17.9766	5.30349	500	lysozyme
NCU08686	R3NCU07392_peak_3103	7.72827	3.51783	502	hypothetical protein
NCU06135	R1NCU07392_peak_847	17.3416	5.13372	503	hypothetical protein
NCU00400	R3NCU07392_peak_2364	7.52117	2.98973	503	hypothetical protein
NCU00258	R3NCU07392_peak_2283	10.2519	4.03909	506	"cytoplasmic ribosomal protein-15, crp-15"
NCU04495	R3NCU07392_peak_2988	7.7863	3.61486	507	C-type cyclin
NCU00733	R3NCU07392_peak_976	30.2338	6.9981	508	hypothetical protein
NCU00733	R1NCU07392_peak_149	21.3807	5.33461	511	hypothetical protein
NCU01987	R3NCU07392_peak_230	17.3309	5.01541	511	hypothetical protein
NCU02501	R3NCU07392_peak_333	13.9235	4.48506	511	hypothetical protein
NCU07935	R1NCU07392_peak_458	12.7327	3.82253	512	caffeine-induced death protein Cid2
NCU00734	R3NCU07392_peak_975	16.3591	4.92417	512	Ulp1 protease
NCU07098	R3NCU07392_peak_4194	11.2079	4.26389	513	hypothetical protein
NCU05286	R3NCU07392_peak_3277	10.2954	3.88985	516	hypothetical protein
NCU16904	R1NCU07392_peak_561	6.46101	3.68496	520	hypothetical protein
NCU03014	R3NCU07392_peak_1100	16.8115	5.15948	520	hypothetical protein
NCU03097	R3NCU07392_peak_603	25.8044	6.86515	520	nucleotide-sugar transporter
NCU07519	R3NCU07392_peak_2475	11.0724	4.31312	522	PIF1
NCU05944	R3NCU07392_peak_4657	7.0494	3.51035	522	hypothetical protein
NCU03529	R3NCU07392_peak_1319	13.7498	4.61173	523	hypothetical protein
NCU06788	R3NCU07392_peak_1513	9.85586	3.82991	523	hypothetical protein
NCU06034	R3NCU07392_peak_4999	14.3071	4.27259	523	hypothetical protein
NCU04939	R3NCU07392_peak_2653	21.9089	6.71941	525	hypothetical protein
NCU00926	R3NCU07392_peak_900	14.5882	4.59185	525	hypothetical protein
NCU08632	R3NCU07392_peak_1246	8.50275	3.14708	526	hypothetical protein
NCU02976	R1NCU07392_peak_176	21.6277	5.58853	527	hypothetical protein
NCU05130	R1NCU07392_peak_794	233.815	24.3217	527	hypothetical protein
NCU03105	R3NCU07392_peak_611	8.88994	3.67655	527	hypothetical protein
NCU01846	R3NCU07392_peak_1542	30.325	7.15292	528	hypothetical protein
NCU07542	R3NCU07392_peak_2462	10.5914	3.97985	528	"rad23-like, rad23"
NCU07478	R3NCU07392_peak_78	15.4623	5.05209	528	mitochondrial carrier protein
NCU00413	R3NCU07392_peak_2371	18.9615	5.60397	529	60S ribosomal protein L2
NCU11319	R3NCU07392_peak_2070	13.2727	4.55753	530	hypothetical protein
NCU05836	R3NCU07392_peak_5265	21.4564	5.9072	531	glycosyl hydrolase family 47 protein
NCU08826	R3NCU07392_peak_3238	9.57805	4.17518	532	hypothetical protein
NCU00836	R3NCU07392_peak_939	7.20457	3.65396	533	hypothetical protein
NCU00901	R3NCU07392_peak_915	9.90866	3.45299	534	"ultraviolet-sensitive-6, uvs-6"
NCU09212	R3NCU07392_peak_801	11.7698	4.26585	537	serine/threonine-protein kinase
NCU11059	R3NCU07392_peak_4666	15.6644	4.81475	539	hypothetical protein
NCU09899	R3NCU07392_peak_532	9.89025	3.91997	540	Frp1
NCU05389	R3NCU07392_peak_1453	14.8537	4.58159	543	hypothetical protein
NCU00983	R3NCU07392_peak_876	20.019	5.94054	543	integral membrane protein
NCU00484	R1NCU07392_peak_396	141.539	17.0516	544	"NADH:ubiquinone oxidoreductase 18.4kD subunit, nuo18.4"
NCU03116	R3NCU07392_peak_622	10.9227	4.26282	545	Ras GTPase activating protein
NCU00938	R1NCU07392_peak_132	164.641	18.2849	546	hypothetical protein
NCU07482	R3NCU07392_peak_74	18.951	5.8401	546	uracil-DNA glycosylase
NCU07754	R3NCU07392_peak_3374	20.7325	5.805	547	methionine permease
NCU06013	R3NCU07392_peak_4624	12.6954	4.37904	547	polyketide synthase-1
NCU11278	R3NCU07392_peak_3652	16.2048	5.53521	550	hypothetical protein
NCU03528	R3NCU07392_peak_1319	13.7498	4.61173	552	DNA polymerase delta subunit 4
NCU06135	R3NCU07392_peak_4959	20.2419	6.01277	553	hypothetical protein
NCU03266	R3NCU07392_peak_690	35.6163	7.85094	553	hypothetical protein
NCU09810	R3NCU07392_peak_549	17.8634	5.37555	554	succinyl-CoA synthetase subunit alpha
NCU12068	R3NCU07392_peak_4188	16.0893	4.94046	555	hypothetical protein
NCU01074	R3NCU07392_peak_3686	11.4093	3.92123	556	hypothetical protein
NCU01345	R3NCU07392_peak_3812	10.8459	4.14643	557	ascospore lethal-1
NCU16684	R3NCU07392_peak_2371	18.9615	5.60397	558	hypothetical protein
NCU09183	R3NCU07392_peak_1899	12.6857	4.66312	559	kynureninase
NCU00512	R1NCU07392_peak_164	210.48	23.1314	560	hypothetical protein
NCU01923	R3NCU07392_peak_262	12.0483	4.26676	561	hypothetical protein
NCU16794	R3NCU07392_peak_2929	20.5352	5.74579	561	hypothetical protein
NCU16794	R1NCU07392_peak_488	10.3803	3.62255	562	hypothetical protein
NCU05836	R1NCU07392_peak_900	21.6159	5.48681	562	glycosyl hydrolase family 47 protein
NCU04761	R3NCU07392_peak_4254	10.7439	4.20158	562	hypothetical protein
NCU02119	R3NCU07392_peak_156	12.072	3.89588	566	capsule protein
NCU08524	R1NCU07392_peak_421	20.6974	5.1689	572	hypothetical protein
NCU03170	R3NCU07392_peak_644	11.2791	4.11154	573	molybdopterin-converting factor subunit 2
NCU06214	R3NCU07392_peak_2124	8.301	3.63509	575	hypothetical protein
NCU04154	R3NCU07392_peak_3999	7.77968	3.53461	575	hypothetical protein
NCU08541	R3NCU07392_peak_2532	12.6354	4.1173	576	hypothetical protein
NCU07910	R3NCU07392_peak_2749	15.3879	4.82817	579	hypothetical protein
NCU11172	R3NCU07392_peak_2248	43.7357	8.03853	582	hypothetical protein
NCU06622	R3NCU07392_peak_2813	19.36	5.85058	583	U2 small nuclear ribonucleoprotein A'
NCU03015	R3NCU07392_peak_1099	12.8292	3.77649	584	hypothetical protein
NCU04645	R3NCU07392_peak_3499	27.6929	6.77787	584	DUF124 domain-containing protein
NCU09061	R3NCU07392_peak_4821	12.6474	4.64912	584	hypothetical protein
NCU05110	R3NCU07392_peak_4703	11.2649	4.37769	586	hypothetical protein
NCU05769	R3NCU07392_peak_5233	18.7699	5.23257	586	hypothetical protein
NCU04987	R3NCU07392_peak_2716	11.9907	4.1647	587	hemolysin-III channel protein Izh2
NCU02921	R3NCU07392_peak_1136	9.55442	3.73755	588	cupin domain-containing protein
NCU09898	R1NCU07392_peak_87	29.0011	6.10781	589	hypothetical protein
NCU08524	R3NCU07392_peak_2538	19.2275	5.36188	590	hypothetical protein
NCU05452	R3NCU07392_peak_1476	10.749	3.95112	591	splicing factor 3b
NCU11370	R3NCU07392_peak_2867	12.3323	4.26762	591	6-phosphogluconate dehydrogenase 2
NCU05617	R3NCU07392_peak_4345	7.31156	3.3104	591	hypothetical protein
NCU06213	R3NCU07392_peak_2124	8.301	3.63509	595	MIZ zinc finger protein
NCU07988	R3NCU07392_peak_3066	10.3325	3.62407	596	ATPase family AAA domain-containing protein 1
NCU03712	R3NCU07392_peak_3592	11.2393	4.18421	596	hypothetical protein
NCU06585	R3NCU07392_peak_2797	14.1035	5.16051	597	Rad4 family protein
NCU04645	R1NCU07392_peak_601	14.7955	4.53427	600	DUF124 domain-containing protein
NCU07901	R3NCU07392_peak_2751	14.6867	4.8077	600	hypothetical protein
NCU06135	R1NCU07392_peak_847	17.3416	5.13372	601	hypothetical protein
NCU09898	R3NCU07392_peak_530	28.3167	6.59114	601	hypothetical protein
NCU03340	R3NCU07392_peak_1384	25.4231	6.2532	602	cytochrome-c oxidase chain VIIc
NCU06760	R3NCU07392_peak_1524	20.2282	5.76595	602	pyruvate dehydrogenase kinase
NCU07247	R3NCU07392_peak_4142	8.52036	3.97399	602	DUF6 domain-containing protein
NCU05853	R3NCU07392_peak_5273	12.419	4.38115	603	MFS sugar transporter
NCU02834	R3NCU07392_peak_1161	16.5526	5.5311	604	hypothetical protein
NCU03884	R3NCU07392_peak_4461	13.1133	4.17425	607	hypothetical protein
NCU09570	R1NCU07392_peak_834	7.9441	3.47411	608	glutathione transferase
NCU17145	R3NCU07392_peak_4730	4.81417	2.77646	608	hypothetical protein
NCU05769	R1NCU07392_peak_892	33.662	6.38259	609	hypothetical protein
NCU06745	R3NCU07392_peak_1530	15.2819	4.99484	609	integral membrane protein
NCU01127	R3NCU07392_peak_3704	22.5986	6.38549	610	DUF636 domain-containing protein
NCU08742	R3NCU07392_peak_1782	9.2538	3.64445	613	DNA repair protein rad14
NCU02429	R3NCU07392_peak_5090	5.91244	2.77924	615	hypothetical protein
NCU03290	R3NCU07392_peak_702	13.999	3.93385	617	dipeptidyl peptidase
NCU03340	R1NCU07392_peak_220	26.2735	5.85708	618	cytochrome-c oxidase chain VIIc
NCU00315	R3NCU07392_peak_2316	10.5953	3.46179	618	60S ribosomal protein L29
NCU10867	R3NCU07392_peak_3081	23.2611	6.09421	619	hypothetical protein
NCU09108	R3NCU07392_peak_722	11.3552	4.31276	619	hypothetical protein
NCU07720	R3NCU07392_peak_2844	13.7864	4.3613	620	MATE efflux family protein
NCU07250	R3NCU07392_peak_3175	5.41467	3.12031	623	hypothetical protein
NCU07473	R3NCU07392_peak_79	35.2555	8.33623	624	glycosyltransferase family 28 domain-containing protein
NCU09807	R3NCU07392_peak_546	9.05536	3.65538	625	hypothetical protein
NCU07554	R1NCU07392_peak_400	16.7871	4.98062	626	chromosome segregation protein SudA
NCU09552	R3NCU07392_peak_3936	15.2621	4.69863	626	topoisomerase 1-associated factor 1
NCU07192	R3NCU07392_peak_4164	5.03044	2.6108	626	hypothetical protein
NCU07553	R3NCU07392_peak_2453	33.6566	7.70947	627	hypothetical protein
NCU06987	R3NCU07392_peak_3198	7.85307	3.41719	627	hypothetical protein
NCU03998	R3NCU07392_peak_4522	7.55481	3.53294	627	adaptor protein complex 3 Mu3A
NCU07277	R3NCU07392_peak_3164	14.4914	5.05933	628	"anchored cell wall protein-8, acw-8"
NCU00644	R3NCU07392_peak_1016	9.03253	3.80149	629	ATP synthase subunit G
NCU02847	R3NCU07392_peak_1155	30.325	7.15292	629	hypothetical protein
NCU07553	R1NCU07392_peak_401	22.8396	5.70009	631	hypothetical protein
NCU12151	R3NCU07392_peak_4747	11.9973	4.33866	633	hypothetical protein
NCU00931	R3NCU07392_peak_897	15.8574	4.60745	633	lysyl-tRNA synthetase
NCU01606	R3NCU07392_peak_1662	14.978	4.70532	635	ATP synthase subunit 5
NCU01335	R3NCU07392_peak_3805	11.7005	4.63772	635	cell division control protein 15
NCU02529	R3NCU07392_peak_344	8.40866	3.52397	637	hypothetical protein
NCU01145	R3NCU07392_peak_3707	14.7039	4.91479	637	hypothetical protein
NCU08898	R3NCU07392_peak_3402	9.44864	4.0304	638	homoaconitase
NCU07636	R3NCU07392_peak_2610	10.7276	4.29043	640	hypothetical protein
NCU05768	R3NCU07392_peak_5232	34.6369	7.85193	640	mating response protein POI2
NCU02643	R3NCU07392_peak_404	13.2693	4.37827	641	hypothetical protein
NCU00334	R3NCU07392_peak_2328	13.866	4.95689	642	3' exoribonuclease
NCU00484	R3NCU07392_peak_2409	19.5652	5.67755	642	"NADH:ubiquinone oxidoreductase 18.4kD subunit, nuo18.4"
NCU01124	R3NCU07392_peak_3704	22.5986	6.38549	642	hypothetical protein
NCU03827	R1NCU07392_peak_630	22.0023	5.58553	644	40S ribosomal protein S9
NCU00421	R3NCU07392_peak_2378	9.55243	3.97728	644	SWI-SNF complex subunit
NCU10853	R3NCU07392_peak_2725	14.1344	4.83335	649	hypothetical protein
NCU07763	R3NCU07392_peak_3367	10.9227	4.26282	650	hypothetical protein
NCU06116	R3NCU07392_peak_4964	5.48866	2.84289	650	hypothetical protein
NCU05794	R3NCU07392_peak_5241	8.84356	3.28455	651	hypothetical protein
NCU01720	R3NCU07392_peak_1620	12.653	4.45592	653	hypothetical protein
NCU16844	R3NCU07392_peak_3140	13.0013	4.47246	653	hypothetical protein
NCU02847	R1NCU07392_peak_187	9.09445	3.66814	658	hypothetical protein
NCU03006	R3NCU07392_peak_1104	6.64709	3.44035	658	sterol 24-C-methyltransferase
NCU08525	R3NCU07392_peak_2537	10.6358	4.57492	659	hypothetical protein
NCU05544	R3NCU07392_peak_4393	18.0247	5.31775	660	dolichyl-phosphate mannosyltransferase polypeptide 3
NCU01489	R3NCU07392_peak_1706	9.48021	3.78796	661	hypothetical protein
NCU04573	R3NCU07392_peak_3536	14.0988	4.36997	661	hypothetical protein
NCU06418	R3NCU07392_peak_2049	65.7489	11.6952	662	ATP-dependent RNA helicase dbp-8
NCU04507	R3NCU07392_peak_2980	12.6474	4.64912	662	ATP binding protein
NCU03827	R3NCU07392_peak_3643	20.5352	5.74579	662	40S ribosomal protein S9
NCU06140	R3NCU07392_peak_4955	13.3336	4.77826	662	hypothetical protein
NCU06103	R3NCU07392_peak_4969	11.983	4.16172	663	mitochondrial translation initiation factor
NCU03550	R3NCU07392_peak_1309	11.4093	3.92123	667	hypothetical protein
NCU00461	R3NCU07392_peak_2400	18.5914	5.27932	670	NAD-specific glutamate dehydrogenase
NCU10501	R1NCU07392_peak_10	32.8972	6.93019	672	hypothetical protein
NCU17030	R3NCU07392_peak_4041	11.2828	4.28819	672	heterogeneous nuclear ribonucleoprotein HRP1
NCU04934	R3NCU07392_peak_2651	8.40866	3.45663	675	hypothetical protein
NCU09439	R1NCU07392_peak_813	39.0047	5.95608	677	RecQ mediated genome instability protein Rmi1
NCU05768	R1NCU07392_peak_891	60.8795	9.92093	677	mating response protein POI2
NCU11209	R3NCU07392_peak_182	11.8121	4.46633	677	vacuolar protein sorting-associated protein Vps28
NCU06418	R1NCU07392_peak_335	658.327	51.8934	678	ATP-dependent RNA helicase dbp-8
NCU05827	R3NCU07392_peak_5262	17.2068	5.39122	679	hypothetical protein
NCU00599	R3NCU07392_peak_1037	6.01495	3.27777	680	37S ribosomal protein Rsm22
NCU06215	R3NCU07392_peak_2125	7.63884	3.17106	680	transferase
NCU04122	R3NCU07392_peak_3988	12.9204	4.63896	681	malate dehydrogenase
NCU10501	R3NCU07392_peak_21	14.5792	4.87302	682	hypothetical protein
NCU00126	R3NCU07392_peak_2226	11.2455	4.276	685	hypothetical protein
NCU04241	R3NCU07392_peak_4041	11.2828	4.28819	685	TBC1 domain family member 22A
NCU09337	R1NCU07392_peak_302	22.796	5.68896	686	"Pheromone-regulated membrane protein 1-like, Prm1"
NCU16775	R3NCU07392_peak_2852	7.70134	3.43592	686	hypothetical protein
NCU02988	R1NCU07392_peak_173	54.7587	9.30921	688	hypothetical protein
NCU09307	R3NCU07392_peak_574	14.5792	4.87302	690	hypothetical protein
NCU09439	R3NCU07392_peak_4790	18.9818	4.31062	692	RecQ mediated genome instability protein Rmi1
NCU03238	R3NCU07392_peak_677	11.4113	4.43075	693	hypothetical protein
NCU11210	R1NCU07392_peak_34	49.1591	8.27773	695	hypothetical protein
NCU04573	R1NCU07392_peak_608	9.85554	3.49482	695	hypothetical protein
NCU08655	R3NCU07392_peak_3118	18.5217	5.69937	696	hypothetical protein
NCU04292	R3NCU07392_peak_4075	6.74852	3.25621	696	branched-chain-amino-acid aminotransferase
NCU01684	R3NCU07392_peak_1632	9.77302	3.53347	698	hypothetical protein
NCU08190	R3NCU07392_peak_2483	7.82111	3.11612	698	hypothetical protein
NCU02781	R3NCU07392_peak_1202	12.6857	4.66312	701	hypothetical protein
NCU00938	R3NCU07392_peak_894	20.0102	5.58944	701	hypothetical protein
NCU04749	R3NCU07392_peak_4248	9.08943	3.52911	702	DNA replication helicase Dna2
NCU01176	R3NCU07392_peak_3719	13.9235	4.48506	703	hypothetical protein
NCU08807	R3NCU07392_peak_3246	5.69806	2.80865	704	"carbon catabolite regulation, cre-1"
NCU03480	R3NCU07392_peak_1339	8.59023	4.0004	705	hypothetical protein
NCU07299	R3NCU07392_peak_3155	9.65158	3.62714	707	splicing factor 3a subunit 2
NCU08655	R1NCU07392_peak_525	10.3813	4.04255	708	hypothetical protein
NCU08511	R3NCU07392_peak_1724	3.09834	2.08578	708	arrestin domain conatining protein
NCU09956	R3NCU07392_peak_4132	17.2068	5.39122	709	hypothetical protein
NCU16784	R3NCU07392_peak_2869	12.1349	4.38337	711	hypothetical protein
NCU08363	R3NCU07392_peak_762	16.1308	4.95339	711	MPU1p
NCU06469	R3NCU07392_peak_2080	12.4582	4.68895	712	54S ribosomal protein L12
NCU01996	R3NCU07392_peak_225	15.5953	4.98946	712	pH-response regulator protein palI/rim-9
NCU16704	R3NCU07392_peak_2508	31.6324	7.67935	712	hypothetical protein
NCU02049	R3NCU07392_peak_190	13.9235	4.48506	714	hypothetical protein
NCU08151	R3NCU07392_peak_5213	19.6582	6.35978	714	DNA kinase/phosphatase Pnk1
NCU00244	R3NCU07392_peak_2278	9.65158	3.62714	715	glycosyl transferase
NCU05569	R3NCU07392_peak_4380	10.9031	3.9979	718	hypothetical protein
NCU11210	R3NCU07392_peak_174	24.4764	6.33209	720	hypothetical protein
NCU08768	R3NCU07392_peak_2560	9.5282	4.48605	721	hypothetical protein
NCU06006	R3NCU07392_peak_4629	11.4093	3.92123	721	hypothetical protein
NCU07364	R3NCU07392_peak_844	9.43179	3.69817	721	hypothetical protein
NCU02794	R3NCU07392_peak_1183	18.2653	4.82988	722	Fso1
NCU08399	R3NCU07392_peak_4890	21.8686	6.41652	722	"polyketide synthase-4, pks-4"
NCU06722	R3NCU07392_peak_3909	4.37894	2.53685	723	tryptophanyl-tRNA synthetase
NCU04938	R1NCU07392_peak_441	71.7991	12.0094	724	choline dehydrogenase
NCU17031	R3NCU07392_peak_4069	9.79045	4.15307	726	hypothetical protein
NCU00329	R3NCU07392_peak_2323	18.3873	5.77871	727	"vegetative asexual development-1, vad-1"
NCU07568	R3NCU07392_peak_2446	8.71842	3.77659	729	hypothetical protein
NCU03169	R3NCU07392_peak_644	11.2791	4.11154	729	hypothetical protein
NCU02765	R3NCU07392_peak_1209	14.0901	4.81946	730	RNA binding protein
NCU07755	R3NCU07392_peak_3374	20.7325	5.805	730	tyrosyl-tRNA synthetase
NCU00268	R3NCU07392_peak_2287	13.2623	4.37514	731	hypothetical protein
NCU05835	R1NCU07392_peak_900	21.6159	5.48681	732	hypothetical protein
NCU02531	R3NCU07392_peak_346	10.3325	3.62407	732	hypothetical protein
NCU08706	R3NCU07392_peak_1764	12.2891	4.43221	733	AAA family ATPase
NCU09205	R3NCU07392_peak_796	11.6956	4.15819	733	"nitrate assimilation regulatory protein nirA, vad-6"
NCU04940	R3NCU07392_peak_2653	21.9089	6.71941	734	reticulon-4-interacting protein 1
NCU04938	R3NCU07392_peak_2652	19.7882	6.12359	735	choline dehydrogenase
NCU03233	R3NCU07392_peak_673	33.1904	8.16538	741	hypothetical protein
NCU16704	R1NCU07392_peak_413	259.835	27.1208	742	hypothetical protein
NCU06189	R3NCU07392_peak_2114	13.0587	4.08682	742	5-aminolevulinate synthase
NCU04374	R3NCU07392_peak_3039	11.3552	4.31276	742	MFS transporter
NCU05828	R3NCU07392_peak_5262	17.2068	5.39122	742	hypothetical protein
NCU01780	R1NCU07392_peak_257	54.993	9.79981	745	hypothetical protein
NCU08355	R3NCU07392_peak_765	19.7133	5.60927	745	hypothetical protein
NCU06035	R3NCU07392_peak_4999	14.3071	4.27259	746	elongation factor 1-beta
NCU06224	R3NCU07392_peak_2130	18.2067	5.84525	747	RING-box protein 1
NCU01692	R3NCU07392_peak_1628	13.9059	4.16768	749	mitochondrial citrate synthase
NCU05722	R3NCU07392_peak_1945	14.5423	4.41139	750	hypothetical protein
NCU07930	R3NCU07392_peak_2743	13.9976	4.69044	750	adenosylhomocysteinase
NCU04036	R3NCU07392_peak_4543	16.6396	4.91221	750	hypothetical protein
NCU03233	R1NCU07392_peak_108	28.28	6.8078	751	hypothetical protein
NCU01302	R3NCU07392_peak_3788	17.0643	5.0336	751	hydrolase
NCU05598	R3NCU07392_peak_4355	17.3524	5.43879	752	"ascus development-1, asd-1"
NCU07432	R1NCU07392_peak_21	19.5909	4.83007	753	tetraspanin
NCU07643	R3NCU07392_peak_2613	16.9731	5.67713	753	hypothetical protein
NCU09030	R3NCU07392_peak_4805	7.30738	3.60595	753	hypothetical protein
NCU02359	R3NCU07392_peak_5115	11.6938	4.42692	754	hypothetical protein
NCU05717	R3NCU07392_peak_1940	12.8803	4.62547	756	37S ribosomal protein Mrp17
NCU09570	R3NCU07392_peak_4878	18.509	5.46465	756	glutathione transferase
NCU01468	R3NCU07392_peak_3943	20.6408	6.14348	757	translation initiation factor eIF-2B subunit delta
NCU03035	R3NCU07392_peak_1088	17.795	4.71129	758	hypothetical protein
NCU08090	R3NCU07392_peak_41	9.23656	3.95589	759	hypothetical protein
NCU04494	R3NCU07392_peak_2988	7.7863	3.61486	761	acetyl xylan esterase
NCU00986	R3NCU07392_peak_875	22.0559	6.47821	762	hypothetical protein
NCU05835	R3NCU07392_peak_5265	21.4564	5.9072	763	hypothetical protein
NCU08766	R3NCU07392_peak_2563	12.1349	4.38337	764	hypothetical protein
NCU07545	R1NCU07392_peak_402	66.7664	8.6537	765	DUF1183 domain-containing protein
NCU01098	R1NCU07392_peak_638	10.3023	3.66351	765	hypothetical protein
NCU06497	R3NCU07392_peak_2097	5.87996	3.08808	765	cell division cycle protein 123
NCU01390	R3NCU07392_peak_3834	8.82057	3.89768	768	cell cycle control protein cwf16
NCU06808	R3NCU07392_peak_1508	14.3528	5.01278	771	hypothetical protein
NCU04494	R1NCU07392_peak_499	9.7753	3.86331	772	acetyl xylan esterase
NCU03696	R3NCU07392_peak_3588	16.4848	4.77828	774	nitroreductase
NCU07000	R3NCU07392_peak_3205	12.0832	4.27793	776	hypothetical protein
NCU03657	R1NCU07392_peak_614	15.9623	4.75804	777	mannosyl-oligosaccharide glucosidase
NCU08226	R3NCU07392_peak_2496	23.2382	6.45711	778	hypothetical protein
NCU08794	R3NCU07392_peak_2543	10.9908	3.87339	779	UPF0041 domain-containing protein
NCU06362	R1NCU07392_peak_490	81.3414	11.5644	780	GTPase activating protein
NCU01098	R3NCU07392_peak_3693	22.4794	5.76239	780	hypothetical protein
NCU02040	R3NCU07392_peak_198	6.58045	2.83237	781	hypothetical protein
NCU02636	R3NCU07392_peak_398	15.9991	5.11667	782	ubiquitin conjugating enzyme
NCU01326	R3NCU07392_peak_3801	8.59519	3.73428	783	hypothetical protein
NCU06486	R3NCU07392_peak_2092	20.918	5.53523	784	hypothetical protein
NCU06647	R3NCU07392_peak_3872	16.4401	4.37941	785	enoyl-CoA hydratase/isomerase
NCU06481	R1NCU07392_peak_343	42.5886	7.61927	786	DNA ligase
NCU16343	R3NCU07392_peak_254	13.9586	4.18226	786	hypothetical protein
NCU05625	R3NCU07392_peak_4338	11.9561	4.32381	789	hypothetical protein
NCU02633	R3NCU07392_peak_395	18.4714	4.80189	790	nuclear mRNA splicing factor-associated protein
NCU07116	R3NCU07392_peak_4182	30.9972	7.34809	790	hypothetical protein
NCU08132	R3NCU07392_peak_5203	10.9227	4.26282	791	"alpha-1,3-glucan synthase Ags2"
NCU08576	R3NCU07392_peak_2515	24.5054	6.8697	792	hypothetical protein
NCU01183	R3NCU07392_peak_3722	20.2678	5.26383	793	GTP-binding protein 1
NCU06296	R1NCU07392_peak_497	20.9633	5.51513	794	hypothetical protein
NCU01811	R3NCU07392_peak_1564	23.6713	6.33492	795	hypothetical protein
NCU07432	R3NCU07392_peak_90	19.8456	4.9831	796	tetraspanin
NCU04713	R3NCU07392_peak_4227	15.2451	5.08927	797	hypothetical protein
NCU02633	R1NCU07392_peak_71	13.9753	3.9818	798	nuclear mRNA splicing factor-associated protein
NCU01893	R1NCU07392_peak_50	11.8577	4.14552	799	hypothetical protein
NCU01038	R3NCU07392_peak_3670	12.7944	4.80879	799	hypothetical protein
NCU06481	R3NCU07392_peak_2085	27.5334	7.4242	800	DNA ligase
NCU04332	R3NCU07392_peak_4089	9.5291	3.30443	800	epoxide hydrolase
NCU06335	R1NCU07392_peak_496	94.1391	12.9042	801	hypothetical protein
NCU04114	R3NCU07392_peak_3981	11.0712	4.04877	801	hypothetical protein
NCU12076	R3NCU07392_peak_4222	11.0586	4.51193	802	hypothetical protein
NCU05950	R3NCU07392_peak_4654	14.5343	4.25828	802	hypothetical protein
NCU06532	R3NCU07392_peak_2773	12.3323	4.26762	803	dihydroorotate reductase PyrE
NCU01800	R3NCU07392_peak_1571	17.5748	5.28743	804	37S ribosomal protein S5
NCU06296	R3NCU07392_peak_2959	22.2322	6.14348	805	hypothetical protein
NCU06033	R3NCU07392_peak_5000	11.9186	4.3121	805	GPI transamidase component PIG-S
NCU09885	R3NCU07392_peak_858	14.5882	4.59185	805	acyl-CoA dehydrogenase
NCU00581	R3NCU07392_peak_1047	7.47234	3.5837	806	phosphopantetheinyl transferase
NCU08521	R3NCU07392_peak_2541	7.62719	3.64036	806	hypothetical protein
NCU06389	R3NCU07392_peak_2919	8.40411	3.59306	806	DUF625 domain-containing protein
NCU01315	R3NCU07392_peak_3792	16.0822	4.66793	806	UDP-N-acetylglucosaminyltransferase
NCU04376	R1NCU07392_peak_506	76.9678	11.4711	808	hypothetical protein
NCU05692	R3NCU07392_peak_1929	24.1129	6.22584	808	hypothetical protein
NCU06623	R3NCU07392_peak_2814	19.2952	5.8289	808	hypothetical protein
NCU06712	R3NCU07392_peak_3905	8.459	3.61192	808	proteasome component PRE5
NCU00331	R3NCU07392_peak_2325	13.2693	4.37827	810	hypothetical protein
NCU00422	R3NCU07392_peak_2378	9.55243	3.97728	810	curved DNA-binding protein
NCU01789	R1NCU07392_peak_255	5.56656	3.20019	811	IDC1 protein
NCU05256	R3NCU07392_peak_3291	18.7136	5.41879	811	hypothetical protein
NCU09289	R3NCU07392_peak_4777	9.987	3.79451	812	hypothetical protein
NCU07735	R3NCU07392_peak_2838	14.8126	5.17141	813	Grp1p
NCU02586	R3NCU07392_peak_369	6.48745	3.38034	814	ENTH domain-containing protein
NCU03879	R3NCU07392_peak_4458	6.98794	3.48684	815	hypothetical protein
NCU08191	R3NCU07392_peak_2483	7.82111	3.11612	816	hypothetical protein
NCU08565	R3NCU07392_peak_2521	13.5034	4.94618	817	hypothetical protein
NCU08321	R3NCU07392_peak_2883	13.3194	4.57318	817	hypothetical protein
NCU07912	R3NCU07392_peak_2748	8.97573	3.63076	819	hypothetical protein
NCU06598	R3NCU07392_peak_2805	14.0811	4.92218	819	hypothetical protein
NCU01692	R1NCU07392_peak_265	7.28372	2.89989	820	mitochondrial citrate synthase
NCU01500	R3NCU07392_peak_1700	15.1688	4.34888	821	nicotinamide riboside kinase 1
NCU00709	R3NCU07392_peak_986	33.5209	7.95902	822	beta-xylosidase
NCU01790	R3NCU07392_peak_1576	14.0694	4.71281	825	hypothetical protein
NCU00144	R3NCU07392_peak_2235	13.824	4.37161	825	hypothetical protein
NCU00709	R1NCU07392_peak_153	17.0619	5.05601	826	beta-xylosidase
NCU10687	R3NCU07392_peak_142	9.77302	3.53347	826	hypothetical protein
NCU03700	R3NCU07392_peak_3589	7.55621	3.4588	826	hypothetical protein
NCU02565	R1NCU07392_peak_64	9.33959	3.81234	828	hypothetical protein
NCU00416	R3NCU07392_peak_2375	12.4863	4.49481	828	C2H2 type zinc finger domain-containing protein
NCU06335	R3NCU07392_peak_2944	19.966	5.68653	828	hypothetical protein
NCU02703	R3NCU07392_peak_429	15.5511	4.97572	828	hypothetical protein
NCU01893	R3NCU07392_peak_277	19.512	5.66164	834	hypothetical protein
NCU09690	R3NCU07392_peak_3416	12.0152	4.01926	834	hypothetical protein
NCU08628	R3NCU07392_peak_1244	13.6344	4.48647	837	hypothetical protein
NCU02917	R3NCU07392_peak_1139	12.3742	4.65991	838	hypothetical protein
NCU01789	R3NCU07392_peak_1577	25.3621	7.00709	839	IDC1 protein
NCU03957	R3NCU07392_peak_4501	6.78358	3.20361	839	COQ7
NCU12156	R3NCU07392_peak_4754	15.8574	4.60745	839	Na(+)/H(+) antiporter 1
NCU01500	R1NCU07392_peak_280	18.8776	4.74382	840	nicotinamide riboside kinase 1
NCU09092	R3NCU07392_peak_107	12.6125	4.44067	840	hypothetical protein
NCU02949	R1NCU07392_peak_179	59.4608	7.50984	843	hypothetical protein
NCU02704	R3NCU07392_peak_430	6.51927	3.24562	845	branched-chain alpha-keto acid dehydrogenase E2 component
NCU02158	R1NCU07392_peak_27	19.5909	4.83007	846	hypothetical protein
NCU03668	R3NCU07392_peak_3577	8.91846	3.93332	846	WD domain-containing protein
NCU04843	R3NCU07392_peak_4306	22.691	6.16074	846	hypothetical protein
NCU05692	R1NCU07392_peak_316	99.9804	13.9259	847	hypothetical protein
NCU07804	R3NCU07392_peak_3353	22.4794	5.76239	847	hypothetical protein
NCU00890	R3NCU07392_peak_924	28.0377	7.14613	850	beta-mannosidase
NCU03048	R3NCU07392_peak_1079	13.2623	4.37514	851	CCCH zinc finger protein
NCU08507	R3NCU07392_peak_1729	14.3025	4.5959	851	zinc finger protein zpr1
NCU01191	R3NCU07392_peak_3728	55.5119	9.22219	853	hypothetical protein
NCU00882	R3NCU07392_peak_926	13.9149	4.48185	853	hypothetical protein
NCU08236	R3NCU07392_peak_2502	17.2046	5.50665	855	hypothetical protein
NCU01191	R1NCU07392_peak_645	145.219	15.3291	856	hypothetical protein
NCU08515	R3NCU07392_peak_1720	16.3729	5.23532	858	vacuolar membrane ATPase-2
NCU04506	R3NCU07392_peak_2980	12.6474	4.64912	858	hypothetical protein
NCU07725	R3NCU07392_peak_2843	11.9973	4.33866	862	chorismate mutase
NCU03231	R3NCU07392_peak_671	7.85307	3.41719	862	mitochondrial chaperone BCS1
NCU07940	R3NCU07392_peak_2735	17.1081	5.04644	863	hypothetical protein
NCU01536	R3NCU07392_peak_1686	19.4608	5.53408	864	hypothetical protein
NCU06846	R1NCU07392_peak_238	12.1245	3.74289	866	MFS myo-inositol transporter
NCU06362	R3NCU07392_peak_2933	24.8596	6.32418	866	GTPase activating protein
NCU17077	R3NCU07392_peak_4305	16.1851	5.17531	866	hypothetical protein
NCU06346	R3NCU07392_peak_2939	16.8944	5.18409	869	hypothetical protein
NCU11219	R3NCU07392_peak_4736	10.2264	3.72517	870	A/G-specific adenine glycosylase
NCU10702	R3NCU07392_peak_853	15.8249	5.66248	870	hypothetical protein
NCU00737	R3NCU07392_peak_974	9.53747	3.52953	871	presequence translocated-associated motor subunit pam-17
NCU02949	R3NCU07392_peak_1129	8.325	3.20034	874	hypothetical protein
NCU16306	R3NCU07392_peak_40	6.78806	3.4941	874	hypothetical protein
NCU10239	R3NCU07392_peak_1200	14.4869	4.94741	878	hypothetical protein
NCU00751	R3NCU07392_peak_969	16.467	5.26584	878	hypothetical protein
NCU05551	R1NCU07392_peak_750	32.6299	6.97958	879	hypothetical protein
NCU01034	R3NCU07392_peak_3667	7.89192	3.57377	879	hypothetical protein
NCU06632	R3NCU07392_peak_2819	22.691	6.16074	880	translocase of outer mitochondrial membrane 20
NCU07510	R1NCU07392_peak_405	387.538	38.2967	881	hypothetical protein
NCU06233	R3NCU07392_peak_2134	11.3424	4.40406	881	hypothetical protein
NCU05279	R3NCU07392_peak_3280	13.824	4.37161	881	hypothetical protein
NCU09548	R3NCU07392_peak_3932	10.749	3.95112	881	platelet-activating factor acetylhydrolase
NCU10210	R3NCU07392_peak_2490	26.9381	6.68388	882	hypothetical protein
NCU00271	R3NCU07392_peak_2289	8.92091	3.6861	885	hypothetical protein
NCU06856	R1NCU07392_peak_237	121.148	18.1993	887	ubiquitin fusion degradation protein
NCU06134	R1NCU07392_peak_847	17.3416	5.13372	887	hypothetical protein
NCU11291	R3NCU07392_peak_2567	13.0792	4.49644	887	hypothetical protein
NCU04280	R3NCU07392_peak_4072	3.50124	2.4561	887	aconitate hydratase
NCU02946	R3NCU07392_peak_1130	12.2432	4.51358	888	mitochondrial carrier domain-containing protein
NCU06300	R3NCU07392_peak_2958	10.2264	3.72517	889	guanylate kinase
NCU07427	R3NCU07392_peak_92	17.1575	5.16053	889	hypothetical protein
NCU08975	R3NCU07392_peak_2418	10.3325	3.62407	890	hypothetical protein
NCU01794	R3NCU07392_peak_1573	15.195	4.50942	892	hypothetical protein
NCU03787	R3NCU07392_peak_3617	15.5532	5.08121	892	hypothetical protein
NCU09217	R1NCU07392_peak_124	41.8365	7.79451	893	golgi reassembly stacking protein
NCU05044	R3NCU07392_peak_4728	15.0062	5.2377	894	hypothetical protein
NCU01750	R3NCU07392_peak_1604	22.0745	5.97609	895	hypothetical protein
NCU06967	R3NCU07392_peak_3185	27.0062	6.58115	896	hypothetical protein
NCU01001	R3NCU07392_peak_3654	20.2419	6.01277	896	hypothetical protein
NCU00436	R3NCU07392_peak_2388	10.1436	4.18279	897	GTPase FZO1
NCU10210	R1NCU07392_peak_407	49.7617	8.79203	900	hypothetical protein
NCU02478	R3NCU07392_peak_317	5.96244	2.94093	900	"alpha-1,3-glucan synthase Ags2"
NCU01001	R1NCU07392_peak_632	61.3151	10.4757	901	hypothetical protein
NCU17176	R3NCU07392_peak_4857	14.8537	4.58159	901	alpha/beta hydrolase
NCU11362	R3NCU07392_peak_2591	10.2811	4.13745	903	DUF890 domain-containing protein
NCU08840	R3NCU07392_peak_3232	16.467	5.26584	904	chromatin remodeling complex subunit
NCU05551	R3NCU07392_peak_4390	14.0045	4.79192	904	hypothetical protein
NCU16627	R3NCU07392_peak_2045	12.7967	4.50184	905	hypothetical protein
NCU06797	R3NCU07392_peak_1511	5.91244	2.65749	908	hypothetical protein
NCU08034	R3NCU07392_peak_3088	14.6636	4.36691	908	small nuclear ribonucleoprotein U
NCU04206	R3NCU07392_peak_4025	10.5849	4.44378	908	hypothetical protein
NCU04305	R3NCU07392_peak_4081	7.63884	3.17106	908	hypothetical protein
NCU16789	R3NCU07392_peak_2882	15.3103	4.46184	909	hypothetical protein
NCU01780	R3NCU07392_peak_1587	20.2537	5.89273	911	hypothetical protein
NCU00438	R3NCU07392_peak_2390	11.5785	3.70565	911	adenosine deaminase
NCU01875	R3NCU07392_peak_282	29.3606	7.27188	911	hypothetical protein
NCU06482	R3NCU07392_peak_2086	14.5792	4.58857	912	pyruvate dehydrogenase E1 component alpha subunit
NCU06958	R3NCU07392_peak_3181	19.7471	5.31048	912	hypothetical protein
NCU07510	R3NCU07392_peak_2482	58.9197	11.7536	913	hypothetical protein
NCU04376	R3NCU07392_peak_3038	19.4643	5.64583	913	hypothetical protein
NCU07751	R3NCU07392_peak_3376	25.8714	6.88589	913	hypothetical protein
NCU00334	R1NCU07392_peak_387	20.3369	5.65992	914	3' exoribonuclease
NCU07033	R3NCU07392_peak_3229	13.9235	4.48506	914	hypothetical protein
NCU09863	R3NCU07392_peak_4575	18.4605	5.44959	917	hypothetical protein
NCU00493	R3NCU07392_peak_2412	14.0816	3.83859	919	coatomer subunit delta
NCU04242	R3NCU07392_peak_4044	11.3424	4.40406	921	ATP-dependent helicase NAM7
NCU03239	R3NCU07392_peak_677	11.4113	4.43075	922	hypothetical protein
NCU07345	R3NCU07392_peak_852	12.3123	4.986	922	hypothetical protein
NCU00593	R1NCU07392_peak_159	55.7726	9.41265	925	"COP9 signalosome-2, csn-2"
NCU06797	R1NCU07392_peak_242	8.95863	2.98607	925	hypothetical protein
NCU01171	R3NCU07392_peak_3716	8.19937	3.02658	925	DNA replication licensing factor mcm5
NCU00593	R3NCU07392_peak_1040	20.1447	5.9806	927	"COP9 signalosome-2, csn-2"
NCU04877	R3NCU07392_peak_2628	12.5693	4.62136	928	hypothetical protein
NCU01636	R1NCU07392_peak_269	17.0464	4.699	930	2-hydroxychromene-2-carboxylate isomerase
NCU16851	R3NCU07392_peak_3147	15.0194	4.71733	933	hypothetical protein
NCU09256	R3NCU07392_peak_1217	11.8604	4.38572	935	hypothetical protein
NCU06134	R3NCU07392_peak_4959	20.2419	6.01277	935	hypothetical protein
NCU06881	R1NCU07392_peak_828	40.0334	8.25363	937	succinyl-CoA:3-ketoacid-coenzyme A transferase subunit A
NCU01951	R3NCU07392_peak_243	32.8028	5.92908	937	"ultraviolet photoreactivation-1, upr-1"
NCU04689	R3NCU07392_peak_4217	9.31126	3.35318	937	hypothetical protein
NCU01844	R3NCU07392_peak_1543	12.2432	4.51358	938	hypothetical protein
NCU00107	R3NCU07392_peak_2215	14.5882	4.59185	938	mitochondrial inner membrane protease ATP-23
NCU04156	R3NCU07392_peak_4001	17.5119	5.16502	938	"ergosterol-1, erg-1"
NCU09693	R3NCU07392_peak_3414	7.83827	3.48078	939	hypothetical protein
NCU06881	R3NCU07392_peak_4837	16.149	5.39239	939	succinyl-CoA:3-ketoacid-coenzyme A transferase subunit A
NCU09121	R3NCU07392_peak_729	13.2835	4.07708	939	vacuolar sorting protein
NCU07388	R3NCU07392_peak_832	23.6916	5.68579	939	hypothetical protein
NCU06856	R3NCU07392_peak_1487	13.8953	5.33629	940	ubiquitin fusion degradation protein
NCU01296	R3NCU07392_peak_3783	9.80316	3.9752	941	hypothetical protein
NCU07100	R3NCU07392_peak_4191	9.41215	4.21326	941	hypothetical protein
NCU09616	R3NCU07392_peak_1287	5.96244	3.25791	942	hypothetical protein
NCU08576	R1NCU07392_peak_415	45.4373	8.67833	943	hypothetical protein
NCU12067	R3NCU07392_peak_4186	10.6404	4.16567	943	hypothetical protein
NCU07870	R3NCU07392_peak_2024	14.7489	4.92887	947	DNA polymerase alpha catalytic subunit
NCU17077	R1NCU07392_peak_734	18.5923	5.18181	949	hypothetical protein
NCU16599	R3NCU07392_peak_1832	11.6848	4.7453	949	C6 zinc finger domain-containing protein
NCU09488	R3NCU07392_peak_1861	15.6644	4.81475	949	SDA1 domain-containing protein
NCU01615	R3NCU07392_peak_1659	13.999	3.93385	950	hypothetical protein
NCU09063	R3NCU07392_peak_4823	15.3351	5.11957	953	nuclear condensin complex subunit Smc4
NCU08447	R3NCU07392_peak_1748	23.8311	6.26163	954	hypothetical protein
NCU16959	R1NCU07392_peak_609	93.22	11.6858	957	hypothetical protein
NCU09948	R1NCU07392_peak_695	40.7694	8.03627	957	hypothetical protein
NCU17176	R3NCU07392_peak_4857	14.8537	4.58159	957	alpha/beta hydrolase
NCU03031	R3NCU07392_peak_1093	12.3649	3.61445	958	succinate dehydrogenase cytochrome b small subunit
NCU01346	R3NCU07392_peak_3811	15.4626	4.94845	958	hypothetical protein
NCU05593	R3NCU07392_peak_4358	12.0477	4.18248	958	mitochondrial outer membrane beta-barrel protein Tob55
NCU05978	R3NCU07392_peak_4638	15.3351	5.11957	958	hypothetical protein
NCU08618	R3NCU07392_peak_1242	9.37108	3.36877	960	ADP-ribosylation factor family protein
NCU07549	R3NCU07392_peak_2456	26.1092	6.56662	961	mitochondrial ribosomal protein L43
NCU07712	R3NCU07392_peak_2849	11.356	4.05501	962	ATP-dependent RNA helicase dbp-10
NCU02168	R3NCU07392_peak_130	21.2157	6.20001	963	PQ loop repeat protein
NCU08117	R3NCU07392_peak_50	30.9478	7.07384	963	hypothetical protein
NCU02353	R3NCU07392_peak_5117	6.95637	3.13699	963	hypothetical protein
NCU02612	R3NCU07392_peak_382	17.561	5.62673	964	hypothetical protein
NCU08141	R3NCU07392_peak_5209	27.9517	6.85235	964	hypothetical protein
NCU01705	R3NCU07392_peak_1624	8.12986	3.65476	965	tRNA methyltransferase
NCU01657	R3NCU07392_peak_1636	14.0355	4.9074	965	cytochrome-c oxidase assembly protein
NCU00618	R3NCU07392_peak_1027	14.3975	4.91839	967	40S ribosomal protein S27
NCU02321	R3NCU07392_peak_5133	28.6154	6.9184	967	hypothetical protein
NCU11325	R3NCU07392_peak_767	8.14722	3.3768	967	alcohol dehydrogenase
NCU02910	R3NCU07392_peak_1143	10.5511	4.5427	969	hypothetical protein
NCU09522	R3NCU07392_peak_1867	13.8861	4.75119	969	hypothetical protein
NCU02283	R3NCU07392_peak_5150	4.99122	2.95732	969	calcium/calmodulin-dependent protein kinase type I
NCU09129	R3NCU07392_peak_733	9.25744	3.87645	971	hypothetical protein
NCU06141	R1NCU07392_peak_844	372.796	31.4833	972	protoheme IX farnesyltransferase
NCU06823	R3NCU07392_peak_1504	17.2208	5.28546	973	hypothetical protein
NCU09879	R3NCU07392_peak_862	10.8125	3.8232	975	hypothetical protein
NCU04503	R3NCU07392_peak_2982	13.4295	4.81048	976	ribosome biogenesis protein Ssf2
NCU06069	R3NCU07392_peak_4979	5.43094	3.20097	976	hypothetical protein
NCU08943	R3NCU07392_peak_4106	13.2623	4.21533	977	3-oxoacyl-(acyl-carrier-protein) reductase
NCU06139	R3NCU07392_peak_4956	11.9973	4.33866	977	hypothetical protein
NCU05392	R3NCU07392_peak_1454	8.97573	3.63076	979	leucine carboxyl methyltransferase 2
NCU05577	R3NCU07392_peak_4375	16.5282	4.70548	979	beta-glucosidase
NCU02158	R3NCU07392_peak_137	19.8116	5.63992	980	hypothetical protein
NCU07005	R3NCU07392_peak_3213	32.0128	7.79535	980	glycosyl hydrolase
NCU04137	R3NCU07392_peak_3993	11.0724	4.31312	981	vacuolar protein sorting-associated protein Vps5
NCU03058	R1NCU07392_peak_94	18.1748	5.16635	983	hypothetical protein
NCU00797	R3NCU07392_peak_953	24.5151	6.59654	983	hypothetical protein
NCU06141	R3NCU07392_peak_4952	33.0596	7.15474	985	protoheme IX farnesyltransferase
NCU00405	R3NCU07392_peak_2366	5.76963	2.99004	986	glycyl-tRNA synthetase 1
NCU03134	R3NCU07392_peak_631	9.55442	3.73755	986	class I alpha-mannosidase 1A
NCU06032	R3NCU07392_peak_5000	11.9186	4.3121	987	long-chain fatty acid transporter
NCU00097	R3NCU07392_peak_2210	16.1851	5.17531	988	hypothetical protein
NCU00332	R3NCU07392_peak_2327	9.47473	4.13503	989	hypothetical protein
NCU08233	R3NCU07392_peak_2501	13.824	4.37161	989	hypothetical protein
NCU03031	R1NCU07392_peak_168	80.5266	8.81944	990	succinate dehydrogenase cytochrome b small subunit
NCU01636	R3NCU07392_peak_1651	19.8456	4.9831	990	2-hydroxychromene-2-carboxylate isomerase
NCU09128	R3NCU07392_peak_734	6.8293	3.3541	990	hypothetical protein
NCU01951	R1NCU07392_peak_45	42.4008	6.31326	994	"ultraviolet photoreactivation-1, upr-1"
NCU07973	R3NCU07392_peak_2724	10.3702	3.99245	994	hypothetical protein
NCU05129	R3NCU07392_peak_4696	15.2878	4.89481	998	anthranilate synthase component I
NCU00597	R3NCU07392_peak_1037	6.01495	3.27777	1000	deoxyribose-phosphate aldolase 2
NCU07527	R3NCU07392_peak_2469	7.08406	3.37062	1000	hypothetical protein
NCU01299	R3NCU07392_peak_3785	13.8718	4.55603	1000	hypothetical protein
NCU02346	R3NCU07392_peak_5121	14.1732	4.39025	1001	hypothetical protein
NCU00935	R3NCU07392_peak_896	9.93807	4.02024	1001	hypothetical protein
NCU05619	R3NCU07392_peak_4344	16.8115	5.15948	1002	hypothetical protein
NCU09759	R3NCU07392_peak_1841	13.9976	4.69044	1003	endonuclease/exonuclease/phosphatase
NCU16766	R3NCU07392_peak_2789	20.2339	5.44614	1004	hypothetical protein
NCU06281	R3NCU07392_peak_2968	18.7136	5.41879	1004	P-type ATPase
NCU02539	R3NCU07392_peak_349	13.3908	4.17704	1004	cell division control protein 54
NCU03601	R3NCU07392_peak_3556	11.3638	4.05791	1004	integral membrane protein
NCU07018	R1NCU07392_peak_537	49.3261	7.56542	1005	histone deacetylase HosB
NCU04109	R3NCU07392_peak_3974	7.83763	3.55408	1005	theta class glutathione S-transferase
NCU09207	R3NCU07392_peak_798	9.54815	3.73488	1005	hypothetical protein
NCU09948	R3NCU07392_peak_4130	18.869	5.69175	1006	hypothetical protein
NCU03058	R3NCU07392_peak_581	19.4807	5.76735	1006	hypothetical protein
NCU01784	R3NCU07392_peak_1582	10.7122	3.86329	1007	pseudouridylate synthase 3
NCU04924	R3NCU07392_peak_2646	15.1985	5.07426	1008	"hypothetical protein similar to phosphatidyl synthase, cut-1"
NCU09817	R3NCU07392_peak_557	10.7867	4.04219	1008	"DAHP synthase, aro-7"
NCU01102	R3NCU07392_peak_3698	32.03	7.80078	1010	mitochondrial export translocase Oxa1
NCU01470	R3NCU07392_peak_3941	7.9991	3.33305	1011	vacuolar protein 8
NCU03302	R3NCU07392_peak_711	6.62792	3.28331	1011	60S ribosomal protein L36
NCU07018	R3NCU07392_peak_3223	22.6935	5.3455	1013	histone deacetylase HosB
NCU08141	R1NCU07392_peak_888	12.8388	4.25561	1014	hypothetical protein
NCU11321	R3NCU07392_peak_2771	6.09979	3.16605	1017	ribosomal L1 domain-containing protein 1
NCU01746	R3NCU07392_peak_1606	12.3323	4.26762	1018	hypothetical protein
NCU07378	R3NCU07392_peak_839	9.48464	3.86961	1018	serine threonine protein kinase
NCU08996	R3NCU07392_peak_2427	9.60672	3.75351	1019	hypothetical protein
NCU00925	R3NCU07392_peak_901	12.7573	4.48947	1020	pescadillo
NCU10507	R3NCU07392_peak_711	6.62792	3.28331	1022	hypothetical protein
NCU07794	R3NCU07392_peak_3358	22.8448	6.46384	1023	2Fe-2S iron-sulfur cluster binding domain-containing protein
NCU08117	R1NCU07392_peak_15	15.425	4.53444	1024	hypothetical protein
NCU02839	R3NCU07392_peak_1159	18.3066	5.10223	1024	T-complex protein 1
NCU07700	R3NCU07392_peak_2857	7.728	3.59403	1024	"colonial temperature-sensitive-3, cot-3"
NCU02502	R3NCU07392_peak_333	13.9235	4.48506	1026	S-adenosyl-methionine-sterol-C
NCU01266	R3NCU07392_peak_3764	10.8125	3.8232	1026	phosphoinositide-specific phospholipase C
NCU17227	R3NCU07392_peak_5004	23.0813	6.82838	1026	hypothetical protein
NCU03147	R3NCU07392_peak_637	14.8537	4.58159	1026	assembly factor cbp-4
NCU00301	R3NCU07392_peak_2308	8.40866	3.52397	1028	Sas10/Utp3 family protein
NCU16902	R3NCU07392_peak_3326	12.2432	4.51358	1028	hypothetical protein
NCU01777	R3NCU07392_peak_1588	19.4981	5.33935	1029	PSP1 domain-containing protein
NCU02450	R3NCU07392_peak_5015	18.8061	5.55675	1030	threonine dehydratase
NCU07716	R3NCU07392_peak_2846	13.7498	4.61173	1034	hypothetical protein
NCU08120	R3NCU07392_peak_54	28.6154	6.9184	1034	mitochondrial ribosomal protein DAP3
NCU00993	R3NCU07392_peak_873	24.036	5.98008	1034	hypothetical protein
NCU00295	R3NCU07392_peak_2306	14.0206	4.60361	1035	hypothetical protein
NCU07716	R1NCU07392_peak_472	25.8343	5.94667	1039	hypothetical protein
NCU00184	R3NCU07392_peak_2251	15.9528	5.10222	1041	hypothetical protein
NCU07694	R3NCU07392_peak_2862	25.141	6.28786	1041	PBSP domain-containing protein
NCU05970	R3NCU07392_peak_4644	11.5387	4.37545	1041	hypothetical protein
NCU08889	R3NCU07392_peak_3405	29.9283	7.44553	1042	hypothetical protein
NCU01015	R3NCU07392_peak_3663	7.45088	2.74041	1043	hypothetical protein
NCU00249	R3NCU07392_peak_2280	12.9204	4.63896	1044	hypothetical protein
NCU03938	R3NCU07392_peak_4490	17.6718	5.31648	1045	"alternative oxidase-5, aod-5"
NCU07386	R3NCU07392_peak_834	21.0964	6.16221	1045	Fe superoxide dismutase
NCU08262	R3NCU07392_peak_2510	8.50275	3.14708	1046	hypothetical protein
NCU09726	R3NCU07392_peak_4917	11.554	4.69671	1046	hypothetical protein
NCU02546	R3NCU07392_peak_352	26.0724	6.68147	1047	nucleolar GTP-binding protein 2
NCU01289	R3NCU07392_peak_3781	15.253	4.69528	1047	hypothetical protein
NCU10788	R3NCU07392_peak_362	17.5526	5.50353	1048	hypothetical protein
NCU06281	R1NCU07392_peak_498	16.6211	4.75734	1049	P-type ATPase
NCU01100	R1NCU07392_peak_640	206.504	23.5359	1049	hypothetical protein
NCU00658	R3NCU07392_peak_1009	25.5155	6.51582	1049	hypothetical protein
NCU04577	R3NCU07392_peak_3535	5.40349	2.81519	1049	hypothetical protein
NCU07719	R3NCU07392_peak_2845	12.8947	4.26921	1050	isopentenyl-diphosphate delta-isomerase
NCU01102	R1NCU07392_peak_640	206.504	23.5359	1051	mitochondrial export translocase Oxa1
NCU05742	R3NCU07392_peak_1974	17.2441	6.37098	1051	hypothetical protein
NCU09539	R3NCU07392_peak_3926	11.7698	4.26585	1051	40S ribosomal protein S13
NCU00658	R1NCU07392_peak_157	27.3428	6.21546	1052	hypothetical protein
NCU08034	R1NCU07392_peak_519	10.9767	3.7088	1052	small nuclear ribonucleoprotein U
NCU11282	R3NCU07392_peak_3113	11.7439	4.65292	1053	acyltransferase
NCU00952	R3NCU07392_peak_890	11.4113	4.24153	1054	mitochondrial ribosomal protein L44
NCU05172	R3NCU07392_peak_3321	12.072	3.89588	1056	hypothetical protein
NCU08878	R3NCU07392_peak_3338	31.7848	7.72533	1056	TEM1
NCU10292	R3NCU07392_peak_3340	16.8115	5.15948	1056	porphobilinogen deaminase
NCU03229	R3NCU07392_peak_671	7.85307	3.41719	1057	"translocase of inner mitochondrial membrane 44, tim44"
NCU08746	R3NCU07392_peak_1784	8.15667	3.26166	1059	starch binding domain-containing protein
NCU02938	R3NCU07392_peak_1134	12.2603	4.16508	1062	hypothetical protein
NCU01368	R3NCU07392_peak_3817	15.195	4.50942	1062	proteasome component C11
NCU05789	R3NCU07392_peak_5237	33.5466	7.41069	1062	secreted glucosidase
NCU04228	R3NCU07392_peak_4033	9.11734	4.10238	1063	phytanoyl-CoA dioxygenase
NCU16497	R3NCU07392_peak_1247	13.5381	4.37334	1064	hypothetical protein
NCU01398	R3NCU07392_peak_3838	22.1953	5.48973	1064	thiol methyltransferase
NCU01398	R1NCU07392_peak_661	28.8801	5.98671	1065	thiol methyltransferase
NCU03602	R3NCU07392_peak_3556	11.3638	4.05791	1065	hypothetical protein
NCU06911	R3NCU07392_peak_4850	12.7394	3.87409	1065	hypothetical protein
NCU07113	R3NCU07392_peak_4184	13.5381	4.37334	1066	hypothetical protein
NCU09032	R3NCU07392_peak_4808	10.9035	4.56552	1067	hypothetical protein
NCU02354	R3NCU07392_peak_5117	6.95637	3.13699	1067	RSC complex subunit
NCU00832	R3NCU07392_peak_941	13.1592	4.61629	1067	hypothetical protein
NCU07487	R3NCU07392_peak_69	14.8521	5.0705	1070	periplasmic beta-glucosidase
NCU03309	R3NCU07392_peak_714	9.55442	3.73755	1070	Nedd8-like protein
NCU06278	R3NCU07392_peak_2161	9.43943	4.12182	1071	elongation factor 2
NCU08270	R3NCU07392_peak_2909	8.3234	3.64245	1072	"dicer-like protein 1, dcl-1"
NCU09202	R3NCU07392_peak_795	9.35134	3.82519	1072	protein kinase dsk1
NCU08878	R1NCU07392_peak_562	26.9724	6.45312	1073	TEM1
NCU09316	R3NCU07392_peak_568	10.2192	4.02796	1073	hypothetical protein
NCU02294	R1NCU07392_peak_876	117.285	14.1543	1074	hypothetical protein
NCU07021	R3NCU07392_peak_3225	17.9555	5.5166	1074	peptide chain release factor 3
NCU04579	R3NCU07392_peak_3535	5.40349	2.81519	1075	dihydroxy-acid dehydratase
NCU06485	R3NCU07392_peak_2092	20.918	5.53523	1076	hypothetical protein
NCU07049	R3NCU07392_peak_4212	22.0406	6.61604	1076	hypothetical protein
NCU09116	R3NCU07392_peak_725	16.7584	4.76724	1076	aromatic aminotransferase Aro8
NCU06769	R1NCU07392_peak_244	28.393	6.5948	1078	activator 1 38 kDa subunit
NCU03964	R3NCU07392_peak_4508	19.1652	5.6682	1078	hypothetical protein
NCU05789	R1NCU07392_peak_894	118.032	14.4716	1079	secreted glucosidase
NCU02937	R1NCU07392_peak_182	19.3557	5.49199	1081	hypothetical protein
NCU16972	R3NCU07392_peak_3675	7.07207	3.51854	1081	hypothetical protein
NCU07138	R3NCU07392_peak_4177	19.1324	5.7767	1082	hypothetical protein
NCU00081	R3NCU07392_peak_2201	7.63884	3.17106	1083	DNA topoisomerase 3-beta
NCU08776	R3NCU07392_peak_2558	29.1899	7.36111	1084	hypothetical protein
NCU02762	R3NCU07392_peak_457	12.487	4.92757	1084	calcium channel subunit Cch1
NCU00881	R3NCU07392_peak_926	13.9149	4.48185	1084	hypothetical protein
NCU01982	R3NCU07392_peak_232	30.2689	6.65546	1085	hypothetical protein
NCU01023	R3NCU07392_peak_3666	5.24594	2.71805	1085	50S ribosomal protein L17
NCU06416	R3NCU07392_peak_2047	6.99184	3.41111	1086	thymine dioxygenase
NCU06455	R3NCU07392_peak_2070	13.2727	4.55753	1086	hypothetical protein
NCU03417	R3NCU07392_peak_1358	7.70134	3.43592	1088	hypothetical protein
NCU06750	R3NCU07392_peak_1529	12.4863	4.49481	1089	coiled-coil domain-containing protein 25
NCU16702	R1NCU07392_peak_410	16.3412	4.60502	1090	hypothetical protein
NCU03452	R3NCU07392_peak_1347	18.2756	5.39401	1090	hypothetical protein
NCU01100	R3NCU07392_peak_3698	32.03	7.80078	1090	hypothetical protein
NCU04825	R3NCU07392_peak_4294	10.8125	3.8232	1090	hypothetical protein
NCU06767	R1NCU07392_peak_244	28.393	6.5948	1092	replication factor C subunit 1
NCU09815	R3NCU07392_peak_556	16.7069	5.34374	1093	hypothetical protein
NCU06293	R3NCU07392_peak_2961	12.7967	4.59873	1094	hypothetical protein
NCU01337	R3NCU07392_peak_3807	18.2078	5.48215	1094	dihydrofolate synthetase Fol3
NCU09214	R3NCU07392_peak_804	13.0792	4.49644	1094	hypothetical protein
NCU04923	R3NCU07392_peak_2646	15.1985	5.07426	1095	"Gld1, gcy-1"
NCU11409	R3NCU07392_peak_4768	7.28643	3.36849	1098	ATP-dependent RNA helicase chl-1
NCU05299	R3NCU07392_peak_3275	5.46551	2.69502	1099	NADH:ubiquinone oxidoreductase 29.9
NCU12107	R3NCU07392_peak_4565	24.2072	6.50066	1099	hypothetical protein
NCU01236	R3NCU07392_peak_3742	12.187	4.22462	1100	GIY-YIG catalytic domain-containing protein
NCU05426	R3NCU07392_peak_1469	20.7128	5.58073	1101	WD repeat protein
NCU01876	R3NCU07392_peak_281	6.45261	3.03896	1101	hypothetical protein
NCU09923	R3NCU07392_peak_3261	4.4604	2.81795	1101	beta-xylosidase
NCU07162	R3NCU07392_peak_4170	16.5282	5.07291	1101	hypothetical protein
NCU00337	R3NCU07392_peak_2330	5.54863	2.91556	1102	nuclear export protein Noc3
NCU02937	R3NCU07392_peak_1133	39.2489	7.90225	1103	hypothetical protein
NCU06409	R3NCU07392_peak_2043	17.2082	4.80351	1103	ribosome biogenesis protein Kri1
NCU08020	R3NCU07392_peak_3081	23.2611	6.09421	1104	DNA mismatch repair protein
NCU04594	R3NCU07392_peak_3529	5.97245	3.34014	1104	4-carboxymuconolactone decarboxylase
NCU06714	R3NCU07392_peak_3907	5.53276	3.16596	1104	para-aminobenzoic acid synthetase
NCU12034	R3NCU07392_peak_4892	14.5545	4.12675	1104	hypothetical protein
NCU06540	R3NCU07392_peak_2780	15.5279	4.68572	1105	topisomerase II associated protein
NCU08617	R3NCU07392_peak_1242	9.37108	3.36877	1106	hypothetical protein
NCU00161	R3NCU07392_peak_2245	19.24	5.8114	1108	hypothetical protein
NCU05208	R3NCU07392_peak_3302	12.2484	4.61703	1108	hypothetical protein
NCU01431	R3NCU07392_peak_3961	13.0784	4.59036	1109	cytokinesis protein sepA
NCU05911	R3NCU07392_peak_4677	15.2621	4.69863	1109	hypothetical protein
NCU03280	R3NCU07392_peak_699	18.0413	5.12212	1109	NUDIX domain-containing protein
NCU05237	R3NCU07392_peak_3297	24.6023	6.49354	1110	hypothetical protein
NCU05831	R3NCU07392_peak_5264	13.4633	4.8217	1110	hypothetical protein
NCU03824	R3NCU07392_peak_3642	11.3638	4.05791	1111	hypothetical protein
NCU02294	R3NCU07392_peak_5142	31.9969	7.1127	1111	hypothetical protein
NCU00232	R1NCU07392_peak_379	34.2234	4.75855	1112	hypothetical protein
NCU08436	R3NCU07392_peak_1808	14.1265	4.93706	1112	alpha/beta hydrolase
NCU05922	R3NCU07392_peak_4673	12.3289	4.44459	1112	hypothetical protein
NCU01106	R3NCU07392_peak_3700	22.2186	5.5916	1113	L-amino acid oxidase
NCU02065	R3NCU07392_peak_183	6.46903	3.22821	1114	DUF726 domain-containing protein
NCU02024	R1NCU07392_peak_38	12.492	4.16267	1115	hypothetical protein
NCU00274	R3NCU07392_peak_2294	4.90815	2.43341	1115	hypothetical protein
NCU16557	R3NCU07392_peak_1576	14.0694	4.71281	1117	hypothetical protein
NCU08672	R3NCU07392_peak_3111	12.1244	4.47444	1118	hypothetical protein
NCU17154	R3NCU07392_peak_4774	9.7358	3.95305	1119	hypothetical protein
NCU09060	R3NCU07392_peak_4820	18.4266	5.9219	1119	hypothetical protein
NCU07671	R3NCU07392_peak_2870	11.7325	4.43998	1120	hypothetical protein
NCU02585	R3NCU07392_peak_369	6.48745	3.38034	1120	aspartyl-tRNA synthetase
NCU01368	R3NCU07392_peak_3817	15.195	4.50942	1120	proteasome component C11
NCU03623	R3NCU07392_peak_3563	10.0832	4.16041	1121	ubiquitin-conjugating enzyme E
NCU07265	R3NCU07392_peak_3166	7.98214	3.60372	1122	hypothetical protein
NCU06290	R3NCU07392_peak_2961	12.7967	4.59873	1123	hypothetical protein
NCU03278	R3NCU07392_peak_698	15.8634	4.97094	1123	protein-ER retention protein
NCU09815	R1NCU07392_peak_89	14.9114	4.74062	1124	hypothetical protein
NCU06645	R3NCU07392_peak_3871	8.40866	3.52397	1124	hypothetical protein
NCU08954	R3NCU07392_peak_4110	28.3775	6.60774	1124	hypothetical protein
NCU07245	R3NCU07392_peak_4148	8.69651	3.68939	1124	hypothetical protein
NCU04051	R3NCU07392_peak_4549	15.6597	4.19557	1124	GCN20
NCU00803	R3NCU07392_peak_952	5.01479	2.84508	1124	MFS transporter
NCU03032	R3NCU07392_peak_1091	22.231	5.79958	1125	betaine lipid synthase
NCU07319	R3NCU07392_peak_3144	8.34118	3.7287	1126	coatomer beta' subunit
NCU04580	R3NCU07392_peak_3534	11.9316	4.50644	1128	vacuolar protein sorting protein Vps66
NCU01301	R3NCU07392_peak_3785	13.8718	4.55603	1128	60S ribosomal subunit assembly/export protein loc-1
NCU05208	R1NCU07392_peak_555	15.7948	4.89547	1129	hypothetical protein
NCU05652	R3NCU07392_peak_4325	17.6068	5.40627	1131	hypothetical protein
NCU05536	R3NCU07392_peak_4400	10.2154	4.20838	1131	hypothetical protein
NCU00325	R3NCU07392_peak_2322	15.1103	4.93888	1132	hypothetical protein
NCU10610	R3NCU07392_peak_3400	13.1989	4.5329	1133	hypothetical protein
NCU03243	R3NCU07392_peak_683	11.4823	3.80527	1133	inositol phosphosphingolipid phospholipase C
NCU02127	R3NCU07392_peak_146	9.55442	3.73755	1134	methylcrotonoyl-CoA carboxylase subunit beta
NCU11349	R3NCU07392_peak_836	17.0643	5.46054	1134	hypothetical protein
NCU08317	R3NCU07392_peak_2886	16.8115	5.15948	1135	hypothetical protein
NCU07320	R3NCU07392_peak_3141	7.83827	3.48078	1135	phosphatidylinositol transporter
NCU08935	R3NCU07392_peak_4103	6.99358	3.57224	1135	peroxisomal-coenzyme A synthetase
NCU06368	R3NCU07392_peak_2930	11.6939	3.61914	1136	hypothetical protein
NCU01841	R1NCU07392_peak_249	92.4314	12.9995	1138	hypothetical protein
NCU00995	R3NCU07392_peak_872	10.457	3.53721	1139	hypothetical protein
NCU07388	R1NCU07392_peak_130	53.9347	7.9636	1140	hypothetical protein
NCU09176	R1NCU07392_peak_312	16.102	4.39881	1140	hypothetical protein
NCU12107	R1NCU07392_peak_779	8.85189	3.66923	1142	hypothetical protein
NCU01072	R3NCU07392_peak_3684	13.8989	4.31336	1142	class II aldolase/adducin domain-containing protein
NCU01982	R1NCU07392_peak_43	28.3584	5.87111	1143	hypothetical protein
NCU02996	R3NCU07392_peak_1109	11.9973	4.33866	1144	endopolyphosphatase
NCU01106	R1NCU07392_peak_641	44.6484	7.32247	1146	L-amino acid oxidase
NCU02044	R3NCU07392_peak_196	23.0945	6.04572	1146	GTP-binding protein
NCU04699	R1NCU07392_peak_711	53.4785	9.41986	1147	methylene-fatty-acyl-phospholipid synthase
NCU09308	R3NCU07392_peak_573	9.87056	3.99759	1147	glycoprotease
NCU08031	R3NCU07392_peak_3085	17.795	4.71129	1150	paxneb protein superfamily
NCU11352	R3NCU07392_peak_2037	16.2096	5.29483	1151	hypothetical protein
NCU09646	R3NCU07392_peak_2574	17.3175	5.31515	1151	3-ketoacyl-CoA thiolase
NCU01011	R3NCU07392_peak_3659	14.5151	4.75251	1154	hypothetical protein
NCU09764	R1NCU07392_peak_306	14.2917	4.48328	1155	hypothetical protein
NCU03041	R3NCU07392_peak_1085	21.7378	6.24062	1155	hypothetical protein
NCU02001	R3NCU07392_peak_219	20.927	5.74925	1156	hypothetical protein
NCU04155	R3NCU07392_peak_4002	21.4719	5.48994	1158	exosome component 1
NCU06928	R3NCU07392_peak_4859	18.784	5.78652	1158	hypothetical protein
NCU02546	R1NCU07392_peak_62	40.4976	7.83999	1159	nucleolar GTP-binding protein 2
NCU16385	R3NCU07392_peak_598	9.22517	3.63564	1159	glutaredoxin domain-containing protein
NCU02979	R3NCU07392_peak_1116	14.4451	5.04372	1160	AMP deaminase
NCU03489	R3NCU07392_peak_1334	5.76963	2.99004	1160	"colonial-21, col-21"
NCU06743	R3NCU07392_peak_1531	37.9584	6.82177	1160	hypothetical protein
NCU06961	R3NCU07392_peak_3183	8.68687	3.35227	1161	exopolygalacturonase
NCU03504	R3NCU07392_peak_1329	11.3638	4.05791	1163	sphingosine-1-phosphate phosphohydrolase
NCU00348	R3NCU07392_peak_2335	8.69651	3.68939	1163	pre-mRNA splicing factor
NCU01383	R3NCU07392_peak_3827	29.1262	6.81369	1164	hypothetical protein
NCU04699	R3NCU07392_peak_4221	14.3528	4.90401	1164	methylene-fatty-acyl-phospholipid synthase
NCU01598	R1NCU07392_peak_272	46.3754	8.24874	1165	methyltransferase
NCU05515	R3NCU07392_peak_4411	8.77053	3.97174	1165	mitochondrial import inner membrane translocase subunit tim16
NCU08877	R1NCU07392_peak_562	26.9724	6.45312	1167	glycine cleavage system H protein
NCU09764	R3NCU07392_peak_1838	18.4605	5.44959	1168	hypothetical protein
NCU08195	R3NCU07392_peak_2485	11.3031	4.39084	1168	arginyl-tRNA synthetase
NCU08538	R3NCU07392_peak_2534	7.91921	3.25088	1169	hypothetical protein
NCU09820	R3NCU07392_peak_558	16.8115	5.15948	1174	hypothetical protein
NCU05162	R3NCU07392_peak_3327	6.69957	3.63416	1175	hypothetical protein
NCU09820	R1NCU07392_peak_90	12.4758	4.31809	1177	hypothetical protein
NCU08316	R3NCU07392_peak_2887	12.3649	4.5534	1177	DUF221 domain-containing protein
NCU04937	R3NCU07392_peak_2652	19.7882	6.12359	1178	hypothetical protein
NCU01598	R3NCU07392_peak_1665	24.0559	6.2092	1179	methyltransferase
NCU02500	R3NCU07392_peak_332	23.4226	6.51581	1179	"clock-controlled pheromone CCG-4, ccg-4"
NCU02009	R3NCU07392_peak_215	7.82111	3.11612	1180	FreB
NCU11308	R3NCU07392_peak_5267	8.13458	2.89102	1180	hypothetical protein
NCU10932	R3NCU07392_peak_323	17.3309	5.01541	1181	hypothetical protein
NCU12026	R3NCU07392_peak_4924	11.0346	4.30044	1182	hypothetical protein
NCU03246	R3NCU07392_peak_684	11.5785	3.70565	1182	tyrosine-protein phosphatase CDC14
NCU01074	R3NCU07392_peak_3685	14.473	4.73974	1183	hypothetical protein
NCU08877	R3NCU07392_peak_3338	31.7848	7.72533	1184	glycine cleavage system H protein
NCU04075	R3NCU07392_peak_4562	10.7867	4.04219	1184	hypothetical protein
NCU02966	R3NCU07392_peak_1122	22.551	6.37063	1185	pre-mRNA splicing factor prp46
NCU05810	R3NCU07392_peak_5252	15.3852	4.92496	1185	"cross pathway control-2, cpc-2"
NCU01505	R3NCU07392_peak_1698	8.70162	3.9466	1186	hypothetical protein
NCU06461	R1NCU07392_peak_338	21.6079	5.90698	1187	hypothetical protein
NCU05810	R1NCU07392_peak_896	12.3891	4.37943	1187	"cross pathway control-2, cpc-2"
NCU07894	R3NCU07392_peak_2754	5.58585	3.04879	1188	oligopeptide transporter 2
NCU06713	R3NCU07392_peak_3904	9.37164	3.12868	1188	vacuolar protein sorting protein 55
NCU03308	R3NCU07392_peak_713	26.4657	6.67104	1188	hypothetical protein
NCU04937	R1NCU07392_peak_441	71.7991	12.0094	1189	hypothetical protein
NCU01383	R1NCU07392_peak_658	371.4	31.4177	1189	hypothetical protein
NCU08934	R3NCU07392_peak_4104	8.75372	3.87427	1189	hypothetical protein
NCU01871	R3NCU07392_peak_285	9.75655	4.04747	1190	hypothetical protein
NCU06371	R1NCU07392_peak_488	10.3803	3.62255	1191	mitochondrial ATP-dependent RNA helicase Suv3
NCU06371	R3NCU07392_peak_2929	20.5352	5.74579	1192	mitochondrial ATP-dependent RNA helicase Suv3
NCU11234	R3NCU07392_peak_348	10.8125	3.8232	1192	translation initiation protein Sua5
NCU03773	R3NCU07392_peak_3612	20.0429	4.87328	1192	hypothetical protein
NCU00352	R3NCU07392_peak_2338	12.81	4.70564	1194	phospholipid-transporting ATPase
NCU07070	R3NCU07392_peak_4201	21.3519	6.38128	1194	ATP-dependent RNA helicase dbp-9
NCU07070	R1NCU07392_peak_708	17.1433	5.28412	1195	ATP-dependent RNA helicase dbp-9
NCU07166	R3NCU07392_peak_4169	11.4921	4.56316	1195	hypothetical protein
NCU04022	R3NCU07392_peak_4539	12.1386	4.68637	1195	C2H2 finger domain-containing protein
NCU00699	R3NCU07392_peak_989	11.0346	4.30044	1195	hypothetical protein
NCU00159	R1NCU07392_peak_375	28.5659	6.41301	1196	Sin3-associated polypeptide Sap18
NCU06175	R3NCU07392_peak_2107	26.9736	6.82223	1196	peroxisomal membrane protein
NCU03329	R3NCU07392_peak_1390	13.0692	4.79305	1197	hypothetical protein
NCU07684	R3NCU07392_peak_2865	7.41386	3.56249	1197	hypothetical protein
NCU03317	R3NCU07392_peak_718	13.9976	4.69044	1197	glucosyltransferase
NCU04015	R3NCU07392_peak_4531	24.8202	6.08686	1198	vacuolar protein sorting-associated protein 27
NCU08734	R3NCU07392_peak_1778	23.1156	6.41856	1200	hypothetical protein
NCU09176	R3NCU07392_peak_1897	24.4525	5.78382	1200	hypothetical protein
NCU01024	R1NCU07392_peak_634	29.8453	6.01732	1201	hypothetical protein
NCU00506	R3NCU07392_peak_1071	19.2983	5.0976	1204	ER membrane protein
NCU01024	R3NCU07392_peak_3665	28.8145	6.09155	1205	hypothetical protein
NCU06065	R3NCU07392_peak_4981	20.2143	5.64937	1205	hypothetical protein
NCU03059	R3NCU07392_peak_581	19.4807	5.76735	1205	SIR2 family histone deacetylase
NCU04510	R3NCU07392_peak_2979	8.73581	3.95913	1206	"aldose reductase, gcy-3"
NCU01389	R3NCU07392_peak_3835	8.325	3.20034	1207	mitogen-activated protein kinase organizer 1
NCU02698	R3NCU07392_peak_426	24.9166	6.34114	1207	hypothetical protein
NCU04237	R3NCU07392_peak_4038	12.0483	4.26676	1208	phosphopantothenoylcysteine decarboxylase
NCU16959	R3NCU07392_peak_3537	20.2678	5.26383	1209	hypothetical protein
NCU06316	R3NCU07392_peak_2948	28.6588	7.80557	1210	hypothetical protein
NCU16924	R3NCU07392_peak_3389	5.90387	3.09632	1210	hypothetical protein
NCU16588	R3NCU07392_peak_1798	7.85307	3.41719	1212	hypothetical protein
NCU03859	R3NCU07392_peak_4446	9.1009	3.90949	1212	MYG1 protein
NCU00606	R1NCU07392_peak_158	18.1718	4.65757	1213	short-chain alcohol dehydrogenase
NCU02475	R3NCU07392_peak_314	8.40005	2.98962	1215	glycine dehydrogenase
NCU10051	R3NCU07392_peak_4887	10.3624	4.26049	1215	flavohemoglobin
NCU06672	R3NCU07392_peak_3885	6.26953	3.09683	1216	autophagy ubiquitin-activating enzyme ApgG
NCU02701	R3NCU07392_peak_428	17.8977	4.90154	1216	dipeptidyl peptidase
NCU00110	R3NCU07392_peak_2217	10.2264	3.72517	1217	hypothetical protein
NCU06055	R3NCU07392_peak_4987	13.6758	4.68484	1217	extracellular alkaline protease
NCU09852	R3NCU07392_peak_4125	7.1703	3.40057	1218	hypothetical protein
NCU07237	R3NCU07392_peak_4152	10.9028	3.71467	1218	hypothetical protein
NCU04609	R3NCU07392_peak_3518	5.98887	3.06393	1219	hypothetical protein
NCU11046	R3NCU07392_peak_3399	27.5861	6.6247	1220	hypothetical protein
NCU04231	R3NCU07392_peak_4034	26.524	6.9528	1221	hypothetical protein
NCU17135	R3NCU07392_peak_4683	45.7302	9.73187	1221	hypothetical protein
NCU01845	R3NCU07392_peak_1543	12.2432	4.51358	1222	phosphoglycerate mutase family domain-containing protein
NCU04815	R3NCU07392_peak_4289	7.9991	3.33305	1225	lactoylglutathione lyase
NCU03059	R1NCU07392_peak_94	18.1748	5.16635	1228	SIR2 family histone deacetylase
NCU04644	R1NCU07392_peak_601	14.7955	4.53427	1229	hypothetical protein
NCU06683	R3NCU07392_peak_3892	7.84757	3.41475	1229	hypothetical protein
NCU04224	R3NCU07392_peak_4030	15.9692	5.21651	1229	hypothetical protein
NCU09502	R3NCU07392_peak_1875	8.88557	3.75235	1230	hypothetical protein
NCU09958	R3NCU07392_peak_4134	13.7741	4.92619	1231	hypothetical protein
NCU09294	R3NCU07392_peak_4770	22.8244	6.59491	1231	hypothetical protein
NCU08250	R1NCU07392_peak_411	19.4686	5.41856	1232	hypothetical protein
NCU11416	R3NCU07392_peak_1839	11.9973	4.33866	1232	hypothetical protein
NCU04154	R3NCU07392_peak_4000	16.7561	5.14183	1232	hypothetical protein
NCU05985	R3NCU07392_peak_4635	25.6107	6.19365	1232	glycerol-3-phosphate O-acyltransferase
NCU04047	R3NCU07392_peak_4546	8.325	3.20034	1233	hypothetical protein
NCU03081	R3NCU07392_peak_597	19.4608	5.53408	1233	hypothetical protein
NCU07164	R1NCU07392_peak_702	22.0023	5.58553	1234	hypothetical protein
NCU00159	R3NCU07392_peak_2244	25.989	5.97988	1234	Sin3-associated polypeptide Sap18
NCU06662	R3NCU07392_peak_3882	10.7198	4.10414	1234	mitochondrial carrier protein
NCU17135	R1NCU07392_peak_792	39.1588	8.02244	1235	hypothetical protein
NCU02698	R1NCU07392_peak_75	27.7653	6.01471	1236	hypothetical protein
NCU01841	R3NCU07392_peak_1546	13.9235	4.48506	1237	hypothetical protein
NCU03206	R1NCU07392_peak_106	57.2761	8.62513	1238	C2H2 finger domain-containing protein
NCU08513	R3NCU07392_peak_1721	15.4623	5.05209	1239	hypothetical protein
NCU08389	R3NCU07392_peak_748	29.385	7.01159	1239	60S ribosomal protein L20
NCU06237	R3NCU07392_peak_2135	26.8685	5.6427	1241	hypothetical protein
NCU05251	R3NCU07392_peak_3292	6.95637	3.13699	1241	DNA-directed RNA polymerase I polypeptide
NCU09184	R3NCU07392_peak_1899	12.6857	4.66312	1242	"indoleamine 2,3-dioxygenase"
NCU07883	R3NCU07392_peak_2033	10.5046	4.03527	1242	hypothetical protein
NCU08250	R3NCU07392_peak_2505	16.1109	5.26322	1242	hypothetical protein
NCU02634	R3NCU07392_peak_396	13.5938	4.65881	1242	hypothetical protein
NCU16787	R3NCU07392_peak_2872	5.28421	2.88325	1243	hypothetical protein
NCU07004	R3NCU07392_peak_3212	10.3179	4.14954	1243	hypothetical protein
NCU00111	R3NCU07392_peak_2216	6.79143	2.80512	1244	hypothetical protein
NCU03115	R3NCU07392_peak_618	18.7596	5.22883	1244	"spa2-like, spa2"
NCU04644	R3NCU07392_peak_3499	27.6929	6.77787	1245	hypothetical protein
NCU08680	R3NCU07392_peak_3109	10.749	3.95112	1247	hypothetical protein
NCU02589	R3NCU07392_peak_372	12.6354	4.1173	1248	hypothetical protein
NCU09886	R3NCU07392_peak_859	9.48464	3.86961	1248	hypothetical protein
NCU08289	R3NCU07392_peak_2899	14.978	4.70532	1250	hypothetical protein
NCU04209	R3NCU07392_peak_4026	17.8977	4.90154	1250	hypothetical protein
NCU02151	R3NCU07392_peak_141	14.6996	4.71589	1252	WD repeat containing protein 23
NCU08113	R3NCU07392_peak_47	6.99184	3.41111	1253	hypothetical protein
NCU08734	R1NCU07392_peak_293	136.07	17.3088	1254	hypothetical protein
NCU07017	R3NCU07392_peak_3223	22.6935	5.3455	1254	hypothetical protein
NCU06661	R3NCU07392_peak_3880	11.9907	4.1647	1254	60S ribosomal protein L22
NCU09425	R3NCU07392_peak_4895	6.87604	3.52717	1254	NdvB protein
NCU05985	R1NCU07392_peak_787	73.3468	10.0052	1255	glycerol-3-phosphate O-acyltransferase
NCU10932	R1NCU07392_peak_56	15.1829	4.39721	1256	hypothetical protein
NCU00606	R3NCU07392_peak_1035	9.65158	3.62714	1256	short-chain alcohol dehydrogenase
NCU06142	R3NCU07392_peak_4952	33.0596	7.15474	1256	hypothetical protein
NCU08173	R3NCU07392_peak_5218	9.71718	4.12735	1256	hypothetical protein
NCU05796	R3NCU07392_peak_5243	10.392	3.8434	1257	trafficking protein particle complex subunit 3
NCU04630	R3NCU07392_peak_3507	6.9558	3.32568	1258	hypothetical protein
NCU10309	R3NCU07392_peak_1559	8.97573	3.63076	1259	TBC domain-containing protein
NCU02081	R3NCU07392_peak_174	24.4764	6.33209	1259	hypothetical protein
NCU02022	R3NCU07392_peak_207	11.8292	4.68364	1259	hypothetical protein
NCU08716	R3NCU07392_peak_1772	14.5545	4.12675	1260	CND11p
NCU00321	R3NCU07392_peak_2320	16.6335	5.20898	1261	hypothetical protein
NCU03883	R3NCU07392_peak_4460	14.5343	4.25828	1261	vacuolar transporter chaperone 1
NCU03206	R3NCU07392_peak_661	18.5935	4.99957	1261	C2H2 finger domain-containing protein
NCU07017	R1NCU07392_peak_537	49.3261	7.56542	1262	hypothetical protein
NCU04944	R3NCU07392_peak_2657	5.98784	3.19461	1264	thiamine pyrophosphokinase Thi80
NCU09420	R3NCU07392_peak_4897	15.6501	5.3413	1265	hsp20 family
NCU11380	R3NCU07392_peak_5208	21.2737	5.96945	1265	hypothetical protein
NCU04394	R3NCU07392_peak_3025	20.2419	6.01277	1267	hypothetical protein
NCU10009	R3NCU07392_peak_4425	12.1687	4.81065	1268	ATP-binding cassette transporter
NCU11300	R3NCU07392_peak_5007	13.4295	4.81048	1268	RING finger domain-containing protein
NCU06142	R1NCU07392_peak_844	372.796	31.4833	1269	hypothetical protein
NCU01154	R3NCU07392_peak_3710	24.627	6.25726	1269	submerged protoperithecia-1
NCU07671	R1NCU07392_peak_479	15.5845	4.83619	1270	hypothetical protein
NCU02181	R3NCU07392_peak_122	24.1236	6.60609	1270	40S ribosomal protein S4
NCU08917	R3NCU07392_peak_3398	4.58261	2.64683	1271	hypothetical protein
NCU09926	R3NCU07392_peak_3261	4.4604	2.81795	1272	hypothetical protein
NCU09897	R3NCU07392_peak_530	28.3167	6.59114	1275	"vacuolar membrane ATPase-5, vma-5"
NCU04152	R3NCU07392_peak_3998	38.4169	7.45034	1277	hypothetical protein
NCU06237	R1NCU07392_peak_354	14.5936	4.0577	1278	hypothetical protein
NCU00976	R3NCU07392_peak_882	25.3621	7.00709	1279	hypothetical protein
NCU08626	R3NCU07392_peak_1244	13.6344	4.48647	1280	"photoreactivation-deficient, phr"
NCU07102	R3NCU07392_peak_4191	9.41215	4.21326	1282	hypothetical protein
NCU05075	R3NCU07392_peak_4714	15.3852	4.92496	1282	mitochondrial tricarboxylate transporter
NCU09336	R3NCU07392_peak_1815	10.3161	4.56821	1283	hypothetical protein
NCU02081	R1NCU07392_peak_34	49.1591	8.27773	1284	hypothetical protein
NCU02686	R3NCU07392_peak_419	19.0193	5.51127	1284	hypothetical protein
NCU00562	R1NCU07392_peak_162	149.084	16.0837	1285	hypothetical protein
NCU06646	R3NCU07392_peak_3871	8.40866	3.52397	1285	RNA polymerase II transcription factor B subunit 5
NCU11383	R3NCU07392_peak_5221	8.75372	3.87427	1285	hypothetical protein
NCU07703	R3NCU07392_peak_2854	26.7964	6.64296	1286	hypothetical protein
NCU09897	R1NCU07392_peak_87	29.0011	6.10781	1287	"vacuolar membrane ATPase-5, vma-5"
NCU08197	R3NCU07392_peak_2486	15.195	4.50942	1287	cytochrome P450 2E1
NCU01253	R3NCU07392_peak_3755	10.0593	3.38311	1287	hypothetical protein
NCU07703	R1NCU07392_peak_475	85.1093	11.9586	1288	hypothetical protein
NCU04306	R1NCU07392_peak_688	127.613	16.0862	1288	methionine aminopeptidase 2B
NCU05946	R3NCU07392_peak_4656	26.5913	6.97368	1288	hypothetical protein
NCU10396	R1NCU07392_peak_416	21.7378	5.5177	1290	hypothetical protein
NCU04152	R1NCU07392_peak_679	21.7797	5.08882	1290	hypothetical protein
NCU03102	R3NCU07392_peak_608	15.253	4.69528	1290	40S ribosomal protein S11
NCU04232	R3NCU07392_peak_4036	13.4295	4.81048	1291	hypothetical protein
NCU06743	R1NCU07392_peak_247	422.267	29.1415	1293	hypothetical protein
NCU07715	R1NCU07392_peak_473	75.4513	11.2715	1294	hypothetical protein
NCU06410	R3NCU07392_peak_2042	8.12202	3.50164	1294	GTP-binding protein YPT52
NCU03985	R3NCU07392_peak_4517	5.90387	3.09632	1295	DUF159 domain-containing protein
NCU06275	R3NCU07392_peak_2159	6.8293	3.3541	1296	hypothetical protein
NCU07983	R3NCU07392_peak_3060	15.0062	5.2377	1297	hypothetical protein
NCU09336	R1NCU07392_peak_301	8.95694	4.1208	1298	hypothetical protein
NCU07090	R1NCU07392_peak_707	17.7773	4.79732	1298	hypothetical protein
NCU07156	R1NCU07392_peak_704	45.6829	9.86452	1299	imidazole glycerol phosphate synthase hisHF
NCU01914	R3NCU07392_peak_267	14.4914	5.05933	1299	sorting nexin-3
NCU04802	R3NCU07392_peak_4280	9.56834	3.81763	1299	peroxisomal biogenesis factor
NCU02344	R3NCU07392_peak_5123	21.9706	5.2549	1299	fungal cellulose binding domain-containing protein
NCU01720	R3NCU07392_peak_1619	7.10146	3.45021	1300	hypothetical protein
NCU04420	R3NCU07392_peak_3019	10.9562	4.09566	1300	hypothetical protein
NCU02919	R3NCU07392_peak_1136	9.55442	3.73755	1303	cupin domain-containing protein
NCU03548	R3NCU07392_peak_1310	14.495	4.84557	1303	hypothetical protein
NCU06524	R3NCU07392_peak_2769	10.0959	3.98687	1303	protease inhibitor
NCU09673	R3NCU07392_peak_3423	12.0483	4.26676	1303	AP-2 complex subunit mu-1
NCU07538	R3NCU07392_peak_2463	11.356	4.05501	1304	hypothetical protein
NCU02846	R3NCU07392_peak_1156	13.0376	4.5775	1305	hypothetical protein
NCU07715	R3NCU07392_peak_2848	25.2877	6.44936	1305	hypothetical protein
NCU01097	R3NCU07392_peak_3692	9.55243	3.97728	1305	hypothetical protein
NCU10911	R3NCU07392_peak_4718	5.60246	3.35494	1306	hypothetical protein
NCU09486	R3NCU07392_peak_1858	17.8977	4.90154	1308	"glucan 1,4-alpha-maltohexaosidase"
NCU11046	R1NCU07392_peak_571	69.1024	10.2685	1309	hypothetical protein
NCU06310	R3NCU07392_peak_2952	10.6306	4.35487	1309	exopolyphosphatase
NCU02601	R3NCU07392_peak_377	8.38452	3.66246	1309	hypothetical protein
NCU05083	R3NCU07392_peak_4711	6.78358	3.20361	1309	hypothetical protein
NCU06364	R3NCU07392_peak_2932	11.0712	4.04877	1312	GDSL lipase/acylhydrolase
NCU12132	R3NCU07392_peak_4682	6.16468	2.89926	1312	hypothetical protein
NCU00599	R3NCU07392_peak_1038	9.0865	3.99421	1314	37S ribosomal protein Rsm22
NCU04160	R3NCU07392_peak_4003	9.05148	3.98188	1314	hypothetical protein
NCU02956	R3NCU07392_peak_1125	19.0782	5.75951	1315	aspartic proteinase
NCU02259	R3NCU07392_peak_5167	14.4631	4.64315	1315	hypothetical protein
NCU02936	R3NCU07392_peak_1134	12.2603	4.16508	1316	proline oxidase
NCU08001	R3NCU07392_peak_3072	22.6935	5.3455	1316	vacuolar protein-sorting protein bro-1
NCU01300	R3NCU07392_peak_3787	9.25637	3.51251	1317	imidazoleglycerol-phosphate dehydratase
NCU01552	R3NCU07392_peak_1675	14.5423	4.41139	1318	ribosomal protein S28
NCU00410	R3NCU07392_peak_2369	6.37488	3.33765	1318	eukaryotic release factor 1
NCU02785	R3NCU07392_peak_1200	14.4869	4.94741	1319	phospho-2-dehydro-3-deoxyheptonate aldolase
NCU16803	R3NCU07392_peak_2991	8.87788	3.83085	1319	hypothetical protein
NCU01004	R3NCU07392_peak_3655	8.09067	3.72277	1319	phosphatidylserine decarboxylase proenzyme
NCU07626	R3NCU07392_peak_2607	12.0529	4.55045	1322	thermoresistant gluconokinase
NCU07993	R3NCU07392_peak_3070	4.41797	2.80199	1322	leucine carboxyl methyltransferase 1
NCU02342	R3NCU07392_peak_5125	19.8619	5.65538	1322	hypothetical protein
NCU09477	R3NCU07392_peak_1851	30.3011	6.25152	1324	"ADP, ATP carrier protein, aac"
NCU09295	R3NCU07392_peak_4771	15.2621	4.69863	1325	hypothetical protein
NCU02984	R1NCU07392_peak_173	54.7587	9.30921	1326	translation machinery-associated protein 22
NCU00356	R1NCU07392_peak_388	64.2833	10.0102	1326	nucleoside transporter
NCU09305	R3NCU07392_peak_4761	8.21924	3.77038	1326	hypothetical protein
NCU01946	R3NCU07392_peak_246	13.3487	4.58244	1328	hypothetical protein
NCU07172	R3NCU07392_peak_4168	6.77875	3.20133	1328	serine/threonine-protein kinase prk1
NCU03202	R3NCU07392_peak_657	15.9473	4.80542	1328	hypothetical protein
NCU02991	R3NCU07392_peak_1112	17.7201	5.33113	1329	hypothetical protein
NCU06450	R3NCU07392_peak_2067	6.78358	3.20361	1330	mitochondrial ribosomal protein
NCU08802	R3NCU07392_peak_3253	17.4041	5.45483	1330	hypothetical protein
NCU02565	R3NCU07392_peak_361	15.2621	4.69863	1330	hypothetical protein
NCU07090	R3NCU07392_peak_4195	16.2318	5.19018	1330	hypothetical protein
NCU00417	R3NCU07392_peak_2376	6.37115	3.19396	1331	cell cycle control protein cwf14
NCU08051	R3NCU07392_peak_24	8.301	3.63509	1331	hypothetical protein
NCU01203	R3NCU07392_peak_3732	11.7973	3.7002	1331	hypothetical protein
NCU16641	R3NCU07392_peak_2106	13.0875	4.69369	1333	hypothetical protein
NCU07111	R3NCU07392_peak_4184	13.5381	4.37334	1333	metallo-beta-lactamase domain-containing protein
NCU01466	R3NCU07392_peak_3944	9.93807	4.02024	1335	hypothetical protein
NCU00469	R3NCU07392_peak_2405	18.9712	5.38959	1336	alpha-tubulin suppressor protein Aats1
NCU02345	R3NCU07392_peak_5122	13.9059	4.16768	1336	hypothetical protein
NCU16661	R3NCU07392_peak_2230	18.617	5.09532	1337	hypothetical protein
NCU04110	R3NCU07392_peak_3975	11.8121	4.46633	1337	branchpoint-bridging protein
NCU08984	R3NCU07392_peak_2422	5.69806	2.80865	1338	hypothetical protein
NCU07262	R3NCU07392_peak_3168	9.65158	4.01207	1338	hypothetical protein
NCU16483	R3NCU07392_peak_1152	7.4711	3.23502	1339	hypothetical protein
NCU06174	R3NCU07392_peak_2108	14.6641	4.90078	1339	DUF1649 domain-containing protein
NCU01272	R3NCU07392_peak_3769	12.5342	4.41667	1339	mitochondrial presequence protease
NCU04136	R3NCU07392_peak_3992	12.0152	4.01926	1339	transcription initiation factor TFIID subunit
NCU03117	R3NCU07392_peak_622	10.9227	4.26282	1339	inosine-5'-monophosphate dehydrogenase IMD2
NCU07934	R1NCU07392_peak_458	12.7327	3.82253	1340	hypothetical protein
NCU00243	R3NCU07392_peak_2278	9.65158	3.62714	1340	microtubule-associated protein RP/EB family member 1
NCU00432	R3NCU07392_peak_2386	19.3486	5.84651	1340	hypothetical protein
NCU17155	R3NCU07392_peak_4775	10.6444	4.07901	1340	hypothetical protein
NCU16380	R3NCU07392_peak_560	16.8115	5.15948	1340	hypothetical protein
NCU03653	R3NCU07392_peak_3570	18.9712	5.38959	1342	hypothetical protein
NCU09079	R3NCU07392_peak_100	21.2219	5.72644	1343	meiotically up-regulated 72 protein
NCU07473	R3NCU07392_peak_80	15.8107	5.27661	1343	glycosyltransferase family 28 domain-containing protein
NCU07932	R3NCU07392_peak_2741	8.97573	3.63076	1344	hypothetical protein
NCU07473	R1NCU07392_peak_18	35.4934	7.5941	1345	glycosyltransferase family 28 domain-containing protein
NCU01984	R1NCU07392_peak_42	12.1245	3.74289	1345	hypothetical protein
NCU00563	R3NCU07392_peak_1054	12.9567	4.552	1345	hypothetical protein
NCU03106	R3NCU07392_peak_610	7.82111	3.11612	1345	hypothetical protein
NCU02953	R3NCU07392_peak_1128	13.2146	4.7356	1346	hypothetical protein
NCU08838	R3NCU07392_peak_3234	13.8257	4.83481	1346	hypothetical protein
NCU07485	R3NCU07392_peak_70	10.0832	4.16041	1346	hypothetical protein
NCU02486	R3NCU07392_peak_322	15.2819	4.99484	1347	hypothetical protein
NCU03910	R3NCU07392_peak_4474	22.294	6.04194	1347	microsomal cytochrome b5
NCU03719	R3NCU07392_peak_3595	13.4299	4.5149	1348	RING finger protein
NCU03805	R3NCU07392_peak_3632	9.79105	4.05941	1349	hypothetical protein
NCU02728	R3NCU07392_peak_440	6.09979	3.16605	1349	pre-mRNA splicing factor ATP-dependent RNA helicase prp16
NCU06244	R3NCU07392_peak_2140	3.9231	2.56289	1350	"translocase of inner mitochondrial membrane, subunit 13, tim13"
NCU00562	R3NCU07392_peak_1055	25.2171	5.88185	1351	hypothetical protein
NCU06776	R3NCU07392_peak_1516	18.7699	5.23257	1351	hypothetical protein
NCU02024	R3NCU07392_peak_205	15.9991	5.11667	1352	hypothetical protein
NCU04306	R3NCU07392_peak_4080	31.4229	7.4737	1352	methionine aminopeptidase 2B
NCU03873	R3NCU07392_peak_4453	7.33437	3.61719	1352	hypothetical protein
NCU05966	R3NCU07392_peak_4646	11.3128	3.96495	1352	DNA repair protein
NCU16378	R3NCU07392_peak_553	9.54042	3.80769	1353	DUF1903 domain-containing protein
NCU00193	R3NCU07392_peak_2255	12.8947	4.26921	1354	GPI mannosyltransferase 3
NCU04231	R1NCU07392_peak_685	231.556	25.1449	1355	hypothetical protein
NCU05851	R3NCU07392_peak_5272	9.54815	3.73488	1356	4-coumarate-CoA ligase 1
NCU09170	R3NCU07392_peak_1892	9.79105	4.05941	1357	alpha-N-arabinofuranosidase II
NCU01984	R3NCU07392_peak_231	21.2555	5.1643	1357	hypothetical protein
NCU00260	R3NCU07392_peak_2283	10.2519	4.03909	1358	oxidoreductase
NCU03802	R3NCU07392_peak_3629	33.3781	7.49407	1358	trimethyllysine dioxygenase
NCU06029	R3NCU07392_peak_5001	20.9385	6.11061	1358	hypothetical protein
NCU06336	R3NCU07392_peak_2945	9.1609	3.84397	1359	"N2,N2-dimethylguanosine tRNA methyltransferase"
NCU04603	R3NCU07392_peak_3523	9.22558	4.04429	1359	hypothetical protein
NCU09290	R3NCU07392_peak_4775	10.6444	4.07901	1359	proteasome component PRE3
NCU06140	R3NCU07392_peak_4956	11.9973	4.33866	1359	hypothetical protein
NCU09477	R1NCU07392_peak_307	20.6712	4.77377	1360	"ADP, ATP carrier protein, aac"
NCU02849	R3NCU07392_peak_1154	14.8521	5.0705	1360	hypothetical protein
NCU04984	R3NCU07392_peak_2714	8.40866	3.52397	1360	hypothetical protein
NCU02508	R3NCU07392_peak_337	11.3783	4.22994	1360	hypothetical protein
NCU05586	R3NCU07392_peak_4363	17.5048	5.4872	1361	malate/L-lactate dehydrogenase
NCU08984	R1NCU07392_peak_397	82.8425	9.45916	1362	hypothetical protein
NCU01174	R3NCU07392_peak_3718	10.2192	4.02796	1362	anaphase-promoting complex subunit CDC23
NCU09283	R3NCU07392_peak_4780	14.1707	4.95202	1362	acetyltransferase
NCU09720	R3NCU07392_peak_4920	11.577	4.3882	1363	hypothetical protein
NCU07425	R3NCU07392_peak_813	16.7256	5.2385	1363	hypothetical protein
NCU06453	R3NCU07392_peak_2068	9.93807	4.02024	1364	hypothetical protein
NCU16702	R3NCU07392_peak_2504	5.96244	2.94093	1367	hypothetical protein
NCU04198	R3NCU07392_peak_4021	13.7498	4.61173	1368	hypothetical protein
NCU04331	R3NCU07392_peak_4090	11.6956	4.15819	1368	"cytoplasmic ribosomal protein-4, crp-4"
NCU09079	R1NCU07392_peak_22	11.4321	3.95557	1369	meiotically up-regulated 72 protein
NCU04496	R3NCU07392_peak_2987	15.9473	4.80542	1369	hypothetical protein
NCU06246	R3NCU07392_peak_2141	13.7444	4.27133	1371	ATP-dependent RNA helicase mrh-4
NCU05166	R3NCU07392_peak_3326	12.2432	4.51358	1372	hypothetical protein
NCU02779	R3NCU07392_peak_1204	42.4771	7.41458	1373	hypothetical protein
NCU03268	R3NCU07392_peak_695	7.45088	2.74041	1373	hypothetical protein
NCU02778	R3NCU07392_peak_1203	26.1681	6.34671	1376	"mannosyl-oligosaccharide 1,2-alpha-mannosidase"
NCU05404	R3NCU07392_peak_1458	7.82111	3.11612	1377	endoglucanase
NCU05634	R3NCU07392_peak_4334	6.39451	3.27076	1377	hypothetical protein
NCU01158	R1NCU07392_peak_643	540.178	36.7122	1378	hypothetical protein
NCU03592	R3NCU07392_peak_3553	16.3255	5.22018	1378	P-type ATPase
NCU09842	R1NCU07392_peak_694	175.726	17.9601	1379	mitogen-activated protein kinase MKC1
NCU07208	R3NCU07392_peak_4159	10.887	4.25043	1379	hypothetical protein
NCU16490	R3NCU07392_peak_1181	13.4633	4.8217	1380	hypothetical protein
NCU08745	R3NCU07392_peak_1784	8.15667	3.26166	1381	hypothetical protein
NCU00811	R3NCU07392_peak_951	15.4743	5.16569	1381	hypothetical protein
NCU06919	R3NCU07392_peak_4854	14.5382	4.85925	1382	hypothetical protein
NCU06335	R3NCU07392_peak_2943	10.4969	4.11873	1383	hypothetical protein
NCU04172	R3NCU07392_peak_4011	10.9816	4.38007	1383	hsp70-like protein
NCU02779	R1NCU07392_peak_195	194.253	17.0959	1384	hypothetical protein
NCU06146	R3NCU07392_peak_4949	10.2811	4.13745	1384	hypothetical protein
NCU01740	R3NCU07392_peak_1608	11.9973	4.33866	1385	histone H2A.Z-specific chaperone chz-1
NCU04252	R3NCU07392_peak_4055	10.6762	4.17757	1385	SNARE docking complex subunit
NCU09842	R3NCU07392_peak_4119	38.3325	7.78989	1385	mitogen-activated protein kinase MKC1
NCU08749	R1NCU07392_peak_294	13.0332	4.47787	1387	hypothetical protein
NCU02416	R3NCU07392_peak_5097	13.9059	4.16768	1387	Phospholipid:diacylglycerol acyltransferase
NCU05819	R3NCU07392_peak_5256	5.68766	2.67502	1387	DUF1237 domain-containing protein
NCU00849	R3NCU07392_peak_936	14.7034	5.02147	1387	hypothetical protein
NCU05187	R3NCU07392_peak_3309	13.4688	4.62031	1388	hypothetical protein
NCU03763	R3NCU07392_peak_3609	5.3585	3.25118	1390	DNA polymerase delta subunit 2
NCU09953	R3NCU07392_peak_4131	14.0811	4.92218	1392	hypothetical protein
NCU04870	R3NCU07392_peak_2625	20.1881	6.12403	1395	acetyl xylan esterase
NCU00150	R1NCU07392_peak_374	43.712	8.11788	1396	phosphoribosylformimino-5-aminoimidazole carboxamide ribotide isomerase
NCU08838	R1NCU07392_peak_544	51.081	8.46586	1396	hypothetical protein
NCU07764	R1NCU07392_peak_566	198.748	21.5146	1397	hypothetical protein
NCU09288	R3NCU07392_peak_4776	13.0784	4.32153	1397	hypothetical protein
NCU08004	R3NCU07392_peak_3075	13.2579	4.74974	1398	electron transfer flavoprotein alpha-subunit
NCU05823	R3NCU07392_peak_5260	17.3309	5.01541	1398	hypothetical protein
NCU05171	R3NCU07392_peak_3321	12.072	3.89588	1399	hypothetical protein
NCU04559	R3NCU07392_peak_3546	16.4534	5.49576	1399	hypothetical protein
NCU03909	R3NCU07392_peak_4473	6.14078	3.25033	1399	transcription initiation factor TFIIE
NCU08265	R3NCU07392_peak_2513	21.6885	6.35599	1400	hypothetical protein
NCU09953	R1NCU07392_peak_696	25.3468	6.24975	1402	hypothetical protein
NCU02262	R1NCU07392_peak_881	48.2329	8.55899	1402	hypothetical protein
NCU01042	R3NCU07392_peak_3671	11.2325	3.61798	1402	hypothetical protein
NCU02262	R3NCU07392_peak_5163	26.9736	6.82223	1403	hypothetical protein
NCU02978	R3NCU07392_peak_1117	16.0934	5.04222	1404	cytoskeleton assembly control protein SLA1p
NCU08054	R3NCU07392_peak_27	11.4996	4.36276	1404	beta-glucosidase 1
NCU06346	R3NCU07392_peak_2938	12.8775	4.52678	1404	hypothetical protein
NCU08717	R3NCU07392_peak_1772	14.5545	4.12675	1406	hypothetical protein
NCU06461	R3NCU07392_peak_2073	25.2877	6.44936	1406	hypothetical protein
NCU07425	R1NCU07392_peak_126	18.0737	4.95556	1408	hypothetical protein
NCU08952	R3NCU07392_peak_4108	25.0359	6.37532	1409	translation regulator GCD7
NCU03961	R3NCU07392_peak_4505	10.9028	3.71467	1410	WD repeat protein
NCU08548	R3NCU07392_peak_2530	10.5728	4.23625	1411	hypothetical protein
NCU06585	R3NCU07392_peak_2798	17.795	4.71129	1411	Rad4 family protein
NCU10186	R3NCU07392_peak_4378	7.05402	3.22794	1411	hypothetical protein
NCU04321	R3NCU07392_peak_4084	9.95621	3.94111	1413	hypothetical protein
NCU06490	R3NCU07392_peak_2095	6.67338	3.2309	1414	hypothetical protein
NCU03802	R1NCU07392_peak_626	19.5596	5.15378	1416	trimethyllysine dioxygenase
NCU01080	R3NCU07392_peak_3687	13.5034	4.94618	1416	glucanase B
NCU16707	R3NCU07392_peak_2516	11.8292	4.68364	1417	hypothetical protein
NCU07764	R3NCU07392_peak_3368	10.0832	4.16041	1419	hypothetical protein
NCU09695	R3NCU07392_peak_3413	6.64288	2.98986	1420	PaxU
NCU06021	R3NCU07392_peak_5004	23.0813	6.82838	1421	WD repeat-containing protein jip-5
NCU08369	R3NCU07392_peak_760	9.22517	3.44287	1421	rhodopsin family protein
NCU05514	R1NCU07392_peak_754	29.7672	5.1792	1422	golgi membrane protein
NCU03538	R3NCU07392_peak_1315	11.6548	4.41394	1422	deoxyribonuclease tatD
NCU16314	R3NCU07392_peak_67	8.48522	3.96092	1422	hypothetical protein
NCU09132	R3NCU07392_peak_740	14.8537	4.58159	1422	alpha tubulin
NCU07497	R3NCU07392_peak_64	5.37782	2.97371	1423	hypothetical protein
NCU00150	R3NCU07392_peak_2239	34.3321	7.76468	1425	phosphoribosylformimino-5-aminoimidazole carboxamide ribotide isomerase
NCU00376	R3NCU07392_peak_2350	12.0396	4.76222	1425	GTR/RAG family GTPase Gtr2
NCU07942	R3NCU07392_peak_2731	17.7102	4.40591	1425	hypothetical protein
NCU01473	R3NCU07392_peak_3939	10.749	3.95112	1425	mitochondrial large ribosomal subunit YmL35
NCU00679	R3NCU07392_peak_997	11.5162	4.18727	1425	hypothetical protein
NCU00359	R3NCU07392_peak_2342	4.56493	2.79704	1426	YEATS family protein
NCU05514	R3NCU07392_peak_4410	17.7351	4.54784	1426	golgi membrane protein
NCU07415	R3NCU07392_peak_816	9.48464	3.86961	1426	proline iminopeptidase
NCU00372	R3NCU07392_peak_2347	13.5381	4.37334	1428	hypothetical protein
NCU01509	R3NCU07392_peak_1696	24.9608	6.73562	1429	hypothetical protein
NCU05650	R3NCU07392_peak_4327	5.69806	2.80865	1429	karyopherin Kap123
NCU07994	R3NCU07392_peak_3069	22.0643	6.09127	1430	hypothetical protein
NCU08408	R3NCU07392_peak_1796	20.6549	5.89774	1432	btn-1
NCU07965	R3NCU07392_peak_2727	22.8079	6.07671	1435	"dolichol-phosphate mannosyltransferase, dpm"
NCU11212	R3NCU07392_peak_163	7.56095	3.61598	1437	GNAT family N-acetyltransferase
NCU00057	R3NCU07392_peak_2191	16.0934	5.04222	1437	ubiquinol cytochrome-c reductase assembly protein Cbp3
NCU01374	R3NCU07392_peak_3820	17.8977	4.90154	1437	CutC family protein
NCU03527	R3NCU07392_peak_1320	20.3872	5.81468	1438	hypothetical protein
NCU03476	R3NCU07392_peak_1340	16.0934	5.04222	1438	hypothetical protein
NCU04637	R3NCU07392_peak_3503	14.7489	4.92887	1439	BAR adaptor protein RVS167
NCU00617	R3NCU07392_peak_1026	7.72827	3.51783	1440	phosducin family protein
NCU01819	R3NCU07392_peak_1557	18.4714	4.80189	1441	hypothetical protein
NCU08268	R3NCU07392_peak_2909	8.3234	3.64245	1441	TOR signaling pathway regulator
NCU11102	R3NCU07392_peak_4100	21.7288	5.98947	1441	SCJ1
NCU08807	R3NCU07392_peak_3247	7.36455	3.2035	1443	"carbon catabolite regulation, cre-1"
NCU07312	R3NCU07392_peak_3148	11.2791	4.11154	1444	hypothetical protein
NCU00537	R3NCU07392_peak_1064	19.5948	6.33747	1445	hypothetical protein
NCU09733	R3NCU07392_peak_2831	14.4308	4.72703	1445	SUN domain-containing protein
NCU06401	R1NCU07392_peak_484	5.24504	2.81771	1446	hypothetical protein
NCU05186	R1NCU07392_peak_557	16.8682	5.42519	1446	hypothetical protein
NCU03972	R3NCU07392_peak_4512	10.7276	4.29043	1446	proteasome regulatory particle
NCU11427	R3NCU07392_peak_1540	12.4922	4.07718	1447	CUE domain-containing protein
NCU09713	R1NCU07392_peak_840	127.043	14.318	1448	hypothetical protein
NCU05944	R3NCU07392_peak_4656	26.5913	6.97368	1448	hypothetical protein
NCU09713	R3NCU07392_peak_4921	27.021	6.24589	1448	hypothetical protein
NCU08686	R1NCU07392_peak_521	526.759	49.9451	1450	hypothetical protein
NCU02497	R3NCU07392_peak_328	15.5076	4.36278	1451	hypothetical protein
NCU01225	R3NCU07392_peak_3739	12.7698	4.40203	1451	ubiquitin conjugating enzyme
NCU04533	R3NCU07392_peak_4937	10.1457	3.84434	1451	"abundant perithecial protein, app"
NCU01158	R3NCU07392_peak_3712	37.5441	7.35231	1452	hypothetical protein
NCU01656	R3NCU07392_peak_1638	9.58389	3.98881	1454	hypothetical protein
NCU01851	R3NCU07392_peak_292	29.055	6.9176	1454	hypothetical protein
NCU07965	R1NCU07392_peak_454	12.0475	4.11979	1455	"dolichol-phosphate mannosyltransferase, dpm"
NCU04259	R3NCU07392_peak_4060	15.1542	4.95275	1455	ubiquinone biosynthesis protein
NCU00775	R3NCU07392_peak_960	16.1851	5.17531	1456	isocitrate dehydrogenase subunit 1
NCU02000	R3NCU07392_peak_220	7.85307	3.41719	1457	splicing factor 3B subunit 10
NCU09973	R3NCU07392_peak_300	10.9028	3.71467	1457	hypothetical protein
NCU11290	R3NCU07392_peak_2549	9.37108	4.00341	1459	hypothetical protein
NCU08972	R3NCU07392_peak_4115	7.82111	3.11612	1459	hypothetical protein
NCU04785	R3NCU07392_peak_4270	14.6624	5.00648	1460	hypothetical protein
NCU02309	R3NCU07392_peak_5139	19.5314	5.78421	1462	hypothetical protein
NCU03393	R1NCU07392_peak_216	31.1451	6.72332	1463	ribosome-associated protein
NCU02811	R3NCU07392_peak_1174	18.9712	5.38959	1463	hypothetical protein
NCU05666	R3NCU07392_peak_1917	10.3535	4.16171	1463	hypothetical protein
NCU02610	R3NCU07392_peak_381	12.9783	4.37704	1463	dynein light chain type 1
NCU01499	R3NCU07392_peak_1702	11.3837	4.42044	1464	hypothetical protein
NCU04116	R3NCU07392_peak_3982	16.5744	5.08654	1464	DUF618 domain-containing protein
NCU09540	R3NCU07392_peak_3925	17.795	4.71129	1465	hypothetical protein
NCU16722	R3NCU07392_peak_2588	14.5343	4.25828	1466	hypothetical protein
NCU04111	R3NCU07392_peak_3979	32.3813	6.97651	1466	phosphoesterase
NCU10388	R3NCU07392_peak_1724	3.09834	2.08578	1468	peptidyl-prolyl cis-trans isomerase-like 3
NCU00126	R3NCU07392_peak_2227	15.8133	4.43949	1468	hypothetical protein
NCU05186	R3NCU07392_peak_3310	10.7893	4.52218	1468	hypothetical protein
NCU05954	R3NCU07392_peak_4653	5.96244	2.94093	1468	hypothetical protein
NCU07156	R3NCU07392_peak_4173	32.6528	8.85854	1470	imidazole glycerol phosphate synthase hisHF
NCU12111	R3NCU07392_peak_4529	15.7386	5.14046	1470	hypothetical protein
NCU07354	R3NCU07392_peak_849	15.1542	4.95275	1470	hypothetical protein
NCU01053	R3NCU07392_peak_3677	15.156	4.27429	1472	hypothetical protein
NCU09774	R3NCU07392_peak_1833	14.4914	5.05933	1473	cellulase
NCU03464	R3NCU07392_peak_1343	9.44864	4.0304	1474	transcription factor TFIID complex subunit Taf13
NCU08849	R3NCU07392_peak_3348	4.76307	3.00348	1474	hypothetical protein
NCU06017	R1NCU07392_peak_857	15.3972	4.97807	1476	thiosulfate sulfurtransferase
NCU16310	R3NCU07392_peak_55	4.60738	2.81426	1477	hypothetical protein
NCU08749	R3NCU07392_peak_1787	21.6093	6.19883	1480	hypothetical protein
NCU17086	R3NCU07392_peak_4341	5.91244	2.77924	1480	hypothetical protein
NCU09973	R1NCU07392_peak_54	57.9227	9.11605	1482	hypothetical protein
NCU05417	R3NCU07392_peak_1462	11.0595	4.40728	1482	hypothetical protein
NCU07851	R3NCU07392_peak_2016	18.5782	5.17744	1483	superoxide dismutase 1 copper chaperone
NCU07544	R3NCU07392_peak_2460	15.5797	5.20052	1483	ubiquitin ligase BRE1
NCU06532	R3NCU07392_peak_2774	14.0206	4.60361	1483	dihydroorotate reductase PyrE
NCU04155	R1NCU07392_peak_680	30.2783	6.61988	1484	exosome component 1
NCU02983	R3NCU07392_peak_1115	30.7722	6.56807	1484	hypothetical protein
NCU06471	R3NCU07392_peak_2081	13.3521	4.49133	1484	pyrroline-5-carboxylate reductase
NCU00365	R3NCU07392_peak_2344	11.7328	4.25445	1484	hypothetical protein
NCU05176	R3NCU07392_peak_3318	8.17545	3.93867	1484	hypothetical protein
NCU06018	R3NCU07392_peak_5007	13.4295	4.81048	1484	hypothetical protein
NCU15836	R3NCU07392_peak_4466	4.52401	2.36389	1486	hypothetical protein
NCU06144	R3NCU07392_peak_4951	24.3323	6.53868	1486	kinesin
NCU07587	R1NCU07392_peak_429	73.0839	13.1369	1487	Swi6
NCU03140	R3NCU07392_peak_635	10.457	3.53721	1488	hypothetical protein rat-1
NCU06452	R3NCU07392_peak_2069	8.40866	3.52397	1489	cysteine synthase
NCU04337	R3NCU07392_peak_3054	7.05402	3.22794	1489	survival factor 1
NCU05938	R3NCU07392_peak_4661	7.85307	3.41719	1491	hypothetical protein
NCU00356	R3NCU07392_peak_2341	14.8474	4.85725	1492	nucleoside transporter
NCU09978	R3NCU07392_peak_302	9.00041	3.79102	1493	hypothetical protein
NCU07740	R3NCU07392_peak_3383	13.824	4.37161	1493	hypothetical protein
NCU01067	R3NCU07392_peak_3681	7.75547	3.60441	1494	hypothetical protein
NCU00719	R3NCU07392_peak_981	19.6956	5.8354	1494	hypothetical protein
NCU07588	R3NCU07392_peak_2583	8.17545	3.93867	1495	hypothetical protein
NCU06017	R3NCU07392_peak_5008	14.2243	5.08358	1495	thiosulfate sulfurtransferase
NCU00727	R3NCU07392_peak_978	9.97338	4.21878	1495	hypothetical protein
NCU07551	R3NCU07392_peak_2454	6.16468	2.89926	1496	hypothetical protein
NCU04156	R3NCU07392_peak_4000	16.7561	5.14183	1496	"ergosterol-1, erg-1"
NCU09869	R3NCU07392_peak_4435	11.9907	4.1647	1496	exocyst complex component Sec3
NCU16432	R3NCU07392_peak_937	15.5797	5.20052	1496	hypothetical protein
NCU02784	R3NCU07392_peak_1199	12.9625	4.65252	1497	hypothetical protein
NCU08825	R3NCU07392_peak_3238	9.57805	4.17518	1497	cytosolic Fe-S cluster assembling factor nbp-35
NCU10077	R3NCU07392_peak_4096	8.91846	3.93332	1497	hypothetical protein
NCU03111	R1NCU07392_peak_100	14.8439	4.54689	1499	hypothetical protein
NCU00160	R3NCU07392_peak_2245	19.24	5.8114	1499	"NADH:ubiquinone oxidoreductase 6.6kD subunit, nuo6.6"
NCU03795	R3NCU07392_peak_3623	13.2419	4.64252	1499	cell division control protein 12
NCU10278	R3NCU07392_peak_4315	13.4295	4.81048	1499	hypothetical protein
NCU01499	R1NCU07392_peak_281	16.3404	5.05024	1500	hypothetical protein
NCU01997	R3NCU07392_peak_223	5.96244	2.94093	1500	ABC transporter
NCU00761	R3NCU07392_peak_964	8.50275	3.14708	1500	triacylglycerol lipase
NCU09005	R3NCU07392_peak_2432	13.2792	4.46799	1501	hypothetical protein
NCU07587	R3NCU07392_peak_2584	29.3753	8.0538	1502	Swi6
NCU07662	R3NCU07392_peak_2874	9.37108	3.36877	1502	peroxisome biogenesis factor 7
NCU04525	R3NCU07392_peak_2971	16.7964	5.05274	1502	hypothetical protein
NCU00719	R1NCU07392_peak_150	60.8592	10.2082	1506	hypothetical protein
NCU02006	R3NCU07392_peak_216	13.2623	4.21533	1507	hypothetical protein
NCU09459	R3NCU07392_peak_4794	25.5482	6.9233	1507	hypothetical protein
NCU07331	R3NCU07392_peak_3138	11.0243	4.20434	1508	U3 small nucleolar ribonucleoprotein Lcp5
NCU05605	R3NCU07392_peak_4350	11.5785	3.70565	1508	hypothetical protein
NCU04847	R1NCU07392_peak_736	107.111	12.9563	1509	cyclin
NCU01666	R3NCU07392_peak_1634	8.70623	3.41758	1510	acetolactate synthase small subunit
NCU01625	R1NCU07392_peak_270	53.8776	8.05321	1511	DNA repair helicase RAD3
NCU05262	R3NCU07392_peak_3287	13.7391	4.80637	1511	hypothetical protein
NCU08408	R1NCU07392_peak_296	13.6615	4.48071	1512	btn-1
NCU00347	R3NCU07392_peak_2334	12.7944	4.80879	1513	peroxin-26 Pex26-Penicillium chrysogenum
NCU01446	R3NCU07392_peak_3952	10.347	4.35664	1513	uracil phosphoribosyltransferase
NCU06845	R3NCU07392_peak_1491	15.9473	4.80542	1514	short chain dehydrogenase/reductase
NCU04059	R3NCU07392_peak_4554	21.4303	5.78688	1514	hypothetical protein
NCU01973	R3NCU07392_peak_235	24.5151	6.59654	1515	"set-domain histone methyltransferase-8, set-8"
NCU01120	R3NCU07392_peak_3701	14.7489	5.03655	1516	meiosis-specific topoisomerase Spo11
NCU00896	R3NCU07392_peak_921	41.2091	8.8759	1516	synaptojanin-1
NCU09461	R3NCU07392_peak_1845	16.0982	5.49891	1517	AP-3 complex subunit sigma
NCU05307	R3NCU07392_peak_3272	12.6354	4.1173	1519	hypothetical protein
NCU04323	R3NCU07392_peak_4086	10.2264	3.72517	1519	dihydroorotase
NCU04762	R3NCU07392_peak_4255	19.1324	5.7767	1519	hypothetical protein
NCU04614	R1NCU07392_peak_602	13.35	3.90217	1520	60S ribosomal protein L19
NCU06833	R3NCU07392_peak_1499	25.3487	6.85959	1520	hypothetical protein
NCU06791	R3NCU07392_peak_1512	20.2339	5.44614	1520	hypothetical protein
NCU00201	R3NCU07392_peak_2260	10.6788	4.09009	1520	hypothetical protein
NCU01204	R3NCU07392_peak_3733	13.2623	4.21533	1520	tropomyosin
NCU04120	R3NCU07392_peak_3985	16.0459	5.13121	1521	calmodulin A
NCU03878	R3NCU07392_peak_4457	17.2476	5.1882	1524	hypothetical protein
NCU09005	R1NCU07392_peak_398	60.8232	9.50076	1525	hypothetical protein
NCU06840	R3NCU07392_peak_1493	19.2602	5.58345	1525	hypothetical protein
NCU16653	R3NCU07392_peak_2198	14.4255	4.54347	1525	hypothetical protein
NCU07643	R3NCU07392_peak_2612	14.0355	4.9074	1525	hypothetical protein
NCU06401	R3NCU07392_peak_2912	19.0663	5.21899	1525	hypothetical protein
NCU04429	R3NCU07392_peak_3016	13.3521	4.49133	1525	mitochondrial import protein mmp37
NCU03111	R3NCU07392_peak_614	32.1181	7.4024	1526	hypothetical protein
NCU04847	R3NCU07392_peak_4309	22.7253	5.72699	1527	cyclin
NCU03393	R3NCU07392_peak_1365	19.0112	5.61989	1528	ribosome-associated protein
NCU00710	R1NCU07392_peak_152	21.4058	4.8578	1529	acetyl xylan esterase
NCU07760	R3NCU07392_peak_3371	41.8698	9.76707	1529	endoglucanase IV
NCU06012	R3NCU07392_peak_4624	12.6954	4.37904	1529	hypothetical protein
NCU06547	R3NCU07392_peak_2781	4.28572	2.6948	1530	hypothetical protein
NCU07101	R3NCU07392_peak_4192	12.6271	4.27148	1531	lipase
NCU03886	R3NCU07392_peak_4463	12.0529	4.55045	1531	PH domain-containing protein
NCU16690	R3NCU07392_peak_2450	17.8634	5.37555	1533	hypothetical protein
NCU06707	R3NCU07392_peak_3899	11.7075	4.33658	1534	hypothetical protein
NCU02988	R3NCU07392_peak_1113	16.9878	5.21266	1535	hypothetical protein
NCU10760	R3NCU07392_peak_3036	24.424	6.43851	1535	jumonji domain-containing protein 5
NCU08686	R3NCU07392_peak_3104	28.3528	7.70009	1535	hypothetical protein
NCU04111	R1NCU07392_peak_676	10.7849	3.66196	1538	phosphoesterase
NCU06480	R3NCU07392_peak_2083	9.65158	3.62714	1538	hypothetical protein
NCU04669	R3NCU07392_peak_3488	8.66984	3.67952	1538	hypothetical protein
NCU07760	R1NCU07392_peak_568	634.319	57.6738	1539	endoglucanase IV
NCU07246	R3NCU07392_peak_4142	8.52036	3.97399	1539	Swi4
NCU08883	R1NCU07392_peak_573	19.7536	5.1133	1540	hypothetical protein
NCU06595	R3NCU07392_peak_2802	11.3638	4.05791	1540	vacuolar protein sorting protein
NCU08853	R3NCU07392_peak_3344	13.8861	4.75119	1540	hypothetical protein
NCU00350	R3NCU07392_peak_2337	9.44184	4.0276	1541	epoxide hydrolase
NCU05255	R3NCU07392_peak_3291	18.7136	5.41879	1541	hypothetical protein
NCU04085	R3NCU07392_peak_4566	12.9035	4.35488	1541	hypothetical protein
NCU03314	R3NCU07392_peak_717	19.1555	4.89249	1541	"mob2-like-a, mob-2a"
NCU02988	R1NCU07392_peak_174	40.5891	7.86263	1542	hypothetical protein
NCU06725	R3NCU07392_peak_3912	15.2819	4.99484	1542	hypothetical protein
NCU02418	R3NCU07392_peak_5097	13.9059	4.16768	1542	hypothetical protein
NCU01851	R1NCU07392_peak_53	86.6816	12.4754	1543	hypothetical protein
NCU02038	R3NCU07392_peak_200	15.9769	4.81393	1543	hypothetical protein
NCU16623	R3NCU07392_peak_2029	13.3979	4.69588	1543	hypothetical protein
NCU00896	R1NCU07392_peak_141	24.5755	6.04533	1544	synaptojanin-1
NCU00670	R3NCU07392_peak_1003	10.2131	3.32186	1546	"NADH:ubiquinone oxidoreductase 9.5, nuo9.5"
NCU09551	R3NCU07392_peak_3935	20.9773	5.55293	1546	MFS multidrug transporter
NCU09063	R3NCU07392_peak_4822	12.6857	4.66312	1547	nuclear condensin complex subunit Smc4
NCU00240	R3NCU07392_peak_2276	18.4979	5.25245	1548	hypothetical protein
NCU07741	R3NCU07392_peak_3382	12.0152	4.01926	1548	1-acyl-sn-glycerol-3-phosphate acyltransferase 2
NCU01580	R1NCU07392_peak_274	7.55446	3.1913	1549	transcription factor TFIIH subunit Tfb4
NCU07989	R3NCU07392_peak_3065	45.3617	9.62096	1549	AP-2 complex subunit sigma
NCU06856	R3NCU07392_peak_1488	6.62792	3.28331	1550	ubiquitin fusion degradation protein
NCU07609	R3NCU07392_peak_2597	14.6973	5.25135	1550	MFS transporter
NCU07158	R3NCU07392_peak_4173	32.6528	8.85854	1550	hypothetical protein
NCU08899	R3NCU07392_peak_3402	9.44864	4.0304	1551	hypothetical protein
NCU01099	R3NCU07392_peak_3695	11.6956	4.15819	1551	GTP-binding protein GTR1
NCU10847	R3NCU07392_peak_893	7.3067	3.30804	1551	"histone acetyltransferase GCN5, ngf-1"
NCU17017	R3NCU07392_peak_3943	20.6408	6.14348	1552	mitochondrial inner membrane protease subunit 1
NCU08883	R3NCU07392_peak_3409	22.0862	5.98031	1553	hypothetical protein
NCU01454	R3NCU07392_peak_3950	16.0982	5.49891	1553	mitochondrial hydrolase
NCU02615	R1NCU07392_peak_68	23.8377	5.85386	1554	hypothetical protein
NCU07885	R3NCU07392_peak_2034	17.7567	5.45301	1554	WD repeat containing protein 82
NCU05135	R3NCU07392_peak_4688	16.2096	5.29483	1554	hypothetical protein
NCU03226	R3NCU07392_peak_668	13.9976	4.69044	1555	Y14 protein
NCU16952	R3NCU07392_peak_3501	26.9381	6.68388	1556	hypothetical protein
NCU01387	R3NCU07392_peak_3832	20.9773	5.55293	1556	hypothetical protein
NCU04996	R3NCU07392_peak_4753	22.1234	6.23436	1556	hypothetical protein
NCU03215	R3NCU07392_peak_664	38.3676	8.20248	1556	glycosyl hydrolase
NCU01387	R1NCU07392_peak_660	12.3208	4.0448	1557	hypothetical protein
NCU03089	R3NCU07392_peak_600	8.50275	3.70316	1557	hypothetical protein
NCU07085	R3NCU07392_peak_4198	10.2122	4.11346	1558	hypothetical protein
NCU06081	R3NCU07392_peak_4976	8.53833	3.43108	1559	hypothetical protein
NCU00558	R3NCU07392_peak_1056	12.7698	4.40203	1560	hypothetical protein
NCU02078	R3NCU07392_peak_176	7.72827	3.51783	1560	hypothetical protein
NCU02527	R3NCU07392_peak_344	8.40866	3.52397	1560	hypothetical protein
NCU02690	R3NCU07392_peak_420	19.6101	5.57895	1560	mitochondrial integral membrane protein
NCU09904	R1NCU07392_peak_8	8.27198	3.79829	1561	"glucan 1,3-beta-glucosidase"
NCU03810	R3NCU07392_peak_3633	12.4922	4.07718	1561	hypothetical protein
NCU00102	R3NCU07392_peak_2212	13.8861	4.75119	1562	hypothetical protein
NCU02734	R3NCU07392_peak_446	16.7005	5.45876	1563	citrate lyase beta subunit
NCU03934	R3NCU07392_peak_4486	11.9973	4.33866	1563	hypothetical protein
NCU06214	R3NCU07392_peak_2123	19.2094	5.56806	1566	hypothetical protein
NCU02496	R3NCU07392_peak_328	15.5076	4.36278	1566	M-phase inducer phosphatase 3
NCU08228	R3NCU07392_peak_2497	10.8205	4.53446	1568	UDP-glucose dehydrogenase
NCU01625	R3NCU07392_peak_1656	18.1391	4.96588	1569	DNA repair helicase RAD3
NCU09904	R3NCU07392_peak_10	10.4641	4.39978	1571	"glucan 1,3-beta-glucosidase"
NCU01036	R3NCU07392_peak_3667	7.89192	3.57377	1571	DUF907 domain-containing protein
NCU03134	R3NCU07392_peak_630	5.63703	3.13443	1571	class I alpha-mannosidase 1A
NCU02811	R1NCU07392_peak_190	12.1245	3.74289	1572	hypothetical protein
NCU00619	R3NCU07392_peak_1026	7.72827	3.51783	1573	hypothetical protein
NCU07826	R3NCU07392_peak_2004	18.7136	5.41879	1573	40S ribosomal protein S19
NCU05108	R3NCU07392_peak_4704	20.4937	5.84762	1573	hypothetical protein
NCU08609	R3NCU07392_peak_1239	5.91244	2.77924	1574	Mn2+ homeostasis protein Per1
NCU01052	R3NCU07392_peak_3676	17.5119	5.16502	1574	hypothetical protein
NCU07989	R1NCU07392_peak_513	26.7881	6.52174	1575	AP-2 complex subunit sigma
NCU04996	R1NCU07392_peak_806	20.0678	5.47908	1575	hypothetical protein
NCU02696	R3NCU07392_peak_424	16.4365	4.44875	1575	pre-mRNA-processing ATP-dependent RNA helicase prp-5
NCU00147	R3NCU07392_peak_2238	18.2756	5.39401	1577	ARD/ARD family protein
NCU05234	R1NCU07392_peak_554	13.3811	4.40307	1579	GTP-binding protein ryh1
NCU00421	R3NCU07392_peak_2379	21.494	6.03786	1579	SWI-SNF complex subunit
NCU16906	R3NCU07392_peak_3330	5.48866	2.84289	1580	hypothetical protein
NCU10468	R3NCU07392_peak_3784	17.1575	5.16053	1580	arginine biosynthesis argJ
NCU05076	R3NCU07392_peak_4713	8.05987	3.99325	1580	hypothetical protein
NCU16559	R3NCU07392_peak_1583	17.2208	5.28546	1582	hypothetical protein
NCU09743	R3NCU07392_peak_2826	22.2186	5.5916	1582	hypothetical protein
NCU00918	R3NCU07392_peak_906	10.8531	4.06341	1582	hypothetical protein
NCU07885	R1NCU07392_peak_331	10.2887	3.93572	1583	WD repeat containing protein 82
NCU05338	R3NCU07392_peak_1438	21.6269	6.33606	1583	hypothetical protein
NCU09125	R3NCU07392_peak_731	12.3696	4.2785	1583	hypothetical protein
NCU04631	R3NCU07392_peak_3505	16.8115	5.15948	1584	hypothetical protein
NCU04588	R3NCU07392_peak_3532	9.77302	3.53347	1585	hypothetical protein
NCU01099	R1NCU07392_peak_639	28.1813	6.31735	1586	GTP-binding protein GTR1
NCU09543	R3NCU07392_peak_3927	18.2268	5.72504	1587	PQ loop repeat protein
NCU09136	R3NCU07392_peak_743	14.3025	4.5959	1587	hypothetical protein
NCU05611	R3NCU07392_peak_4346	12.653	4.45592	1588	hypothetical protein
NCU04897	R3NCU07392_peak_2634	5.5413	3.0983	1589	hypothetical protein
NCU03904	R3NCU07392_peak_4472	11.6956	4.15819	1589	hypothetical protein
NCU07021	R1NCU07392_peak_539	8.59709	3.74038	1591	peptide chain release factor 3
NCU00670	R1NCU07392_peak_155	21.9805	4.46706	1592	"NADH:ubiquinone oxidoreductase 9.5, nuo9.5"
NCU09145	R3NCU07392_peak_1879	10.3325	3.62407	1592	hypothetical protein
NCU10477	R3NCU07392_peak_4335	6.62792	3.28331	1592	ubiquitin-conjugating enzyme E2
NCU06116	R3NCU07392_peak_4965	13.5381	4.37334	1592	hypothetical protein
NCU09880	R3NCU07392_peak_863	11.6156	4.40103	1592	small nuclear ribonucleoprotein SmG
NCU11219	R1NCU07392_peak_803	53.3033	10.1499	1593	A/G-specific adenine glycosylase
NCU04468	R3NCU07392_peak_2997	16.7005	5.45876	1593	proline-specific permease
NCU05901	R3NCU07392_peak_5295	11.8913	4.49299	1593	hypothetical protein
NCU02167	R3NCU07392_peak_132	15.2266	4.3641	1594	"Krev-1-like, krev-1"
NCU03520	R3NCU07392_peak_1322	10.6762	4.17757	1594	hypothetical protein
NCU02246	R3NCU07392_peak_5171	25.8893	6.38347	1594	hypothetical protein
NCU09743	R1NCU07392_peak_470	54.8606	8.57797	1597	hypothetical protein
NCU08706	R3NCU07392_peak_1765	20.1756	5.74989	1598	AAA family ATPase
NCU04026	R3NCU07392_peak_4540	4.6081	2.52658	1598	hypothetical protein
NCU00812	R3NCU07392_peak_951	15.4743	5.16569	1598	exosome complex exonuclease RRP41
NCU06585	R1NCU07392_peak_467	19.2863	4.61889	1599	Rad4 family protein
NCU01806	R3NCU07392_peak_1569	17.599	4.9981	1600	3' exoribonuclease
NCU11219	R3NCU07392_peak_4737	30.8553	8.05431	1600	A/G-specific adenine glycosylase
NCU03267	R3NCU07392_peak_694	9.54815	3.47242	1601	NAD+ kinase Utr1
NCU06145	R3NCU07392_peak_4950	14.3479	4.70182	1603	RING-6
NCU00182	R3NCU07392_peak_2250	19.8162	5.14501	1604	integral membrane protein
NCU09734	R3NCU07392_peak_2829	10.2356	3.95054	1607	hypothetical protein
NCU01529	R3NCU07392_peak_1688	12.8292	3.77649	1608	hypothetical protein
NCU08834	R3NCU07392_peak_3235	7.21346	3.49021	1610	hypothetical protein
NCU03436	R3NCU07392_peak_1351	22.0862	5.98031	1612	serine/threonine-protein phosphatase ppe1
NCU09189	R3NCU07392_peak_1901	10.5849	4.44378	1612	hypothetical protein
NCU08915	R3NCU07392_peak_3398	4.58261	2.64683	1612	hypothetical protein
NCU08358	R3NCU07392_peak_764	6.21765	3.27893	1613	hypothetical protein
NCU07586	R3NCU07392_peak_2582	23.9001	7.1169	1615	hypothetical protein
NCU04242	R3NCU07392_peak_4045	12.9383	4.74895	1615	ATP-dependent helicase NAM7
NCU09217	R3NCU07392_peak_805	13.9976	4.69044	1615	golgi reassembly stacking protein
NCU06602	R3NCU07392_peak_2807	22.8823	6.75987	1616	hypothetical protein
NCU07298	R3NCU07392_peak_3154	10.6762	4.17757	1616	CAIB/BAIF family enzyme
NCU01432	R3NCU07392_peak_3961	13.0784	4.59036	1616	hypothetical protein
NCU04243	R3NCU07392_peak_4043	11.2079	4.26389	1617	U3 small nucleolar ribonucleoprotein IMP4
NCU01927	R1NCU07392_peak_46	85.685	13.0847	1618	hypothetical protein
NCU07101	R1NCU07392_peak_706	16.3574	4.60919	1618	lipase
NCU04492	R3NCU07392_peak_2990	7.31156	3.3104	1620	hypothetical protein
NCU11054	R3NCU07392_peak_1342	20.7533	6.05151	1622	hypothetical protein
NCU01252	R3NCU07392_peak_3753	18.9228	5.70854	1622	MYND domain-containing protein
NCU04065	R3NCU07392_peak_4556	19.4608	5.53408	1622	potassium channel protein
NCU03417	R3NCU07392_peak_1359	10.749	3.95112	1623	hypothetical protein
NCU01927	R3NCU07392_peak_259	23.0272	6.52388	1623	hypothetical protein
NCU01899	R1NCU07392_peak_48	35.3811	6.29125	1624	hypothetical protein
NCU02615	R3NCU07392_peak_384	22.8062	6.19555	1624	hypothetical protein
NCU00259	R3NCU07392_peak_2282	6.26953	3.09683	1625	hypothetical protein
NCU07998	R3NCU07392_peak_3071	8.97573	3.63076	1625	hypothetical protein
NCU06205	R3NCU07392_peak_2120	14.6996	4.71589	1626	"regulator of conidiation-1, rco-1"
NCU03894	R3NCU07392_peak_4469	19.1803	5.34827	1626	serine/threonine-protein kinase ste-20
NCU06602	R1NCU07392_peak_468	59.8894	10.9298	1627	hypothetical protein
NCU07990	R3NCU07392_peak_3068	7.74132	3.68233	1629	hypothetical protein
NCU04090	R3NCU07392_peak_4569	16.6633	5.11404	1629	niemann-Pick C1 protein
NCU00385	R3NCU07392_peak_2354	11.2757	4.19555	1630	ATP synthase subunit delta
NCU04804	R3NCU07392_peak_4280	9.56834	3.81763	1630	hypothetical protein
NCU02053	R3NCU07392_peak_186	10.7428	3.9483	1633	REV1
NCU05273	R3NCU07392_peak_3282	17.4544	5.47097	1633	Vps52/Sac2 family protein
NCU01464	R3NCU07392_peak_3946	9.90866	3.45299	1633	zinc carboxypeptidase
NCU04345	R1NCU07392_peak_510	437.181	38.0451	1634	adaptin ear-binding coat-associated protein 2
NCU07915	R3NCU07392_peak_2745	13.2792	4.46799	1636	integral membrane protein
NCU12091	R3NCU07392_peak_4306	22.691	6.16074	1639	hypothetical protein
NCU02918	R3NCU07392_peak_1137	7.4711	3.23502	1640	"polyketide synthase-6, pks-6"
NCU03369	R1NCU07392_peak_218	42.3357	7.24511	1641	pirin
NCU07899	R3NCU07392_peak_2751	14.6867	4.8077	1641	CAIB/BAIF family protein
NCU05894	R3NCU07392_peak_5292	6.31698	3.24335	1641	hypothetical protein
NCU03139	R3NCU07392_peak_634	9.5291	3.30443	1642	"histidine-3, his-3"
NCU02842	R3NCU07392_peak_1158	16.6018	5.42516	1643	hypothetical protein
NCU04163	R3NCU07392_peak_4005	32.167	7.55318	1643	hypothetical protein
NCU09423	R3NCU07392_peak_4896	19.36	5.85058	1643	secreted protein
NCU08003	R1NCU07392_peak_515	15.5845	4.83619	1645	RSC complex subunit
NCU07416	R3NCU07392_peak_817	11.0712	4.04877	1646	hypothetical protein
NCU00894	R1NCU07392_peak_141	24.5755	6.04533	1647	hypothetical protein
NCU03460	R3NCU07392_peak_1345	12.0836	4.56107	1647	dehydrodolichyl diphosphate synthase
NCU01324	R3NCU07392_peak_3799	15.8077	4.67661	1647	hypothetical protein
NCU01234	R3NCU07392_peak_3742	12.187	4.22462	1648	eukaryotic initiation factor 4A-12
NCU09249	R3NCU07392_peak_1220	30.0945	7.35437	1651	prefoldin subunit 2
NCU07214	R3NCU07392_peak_4157	3.33421	2.35274	1651	hypothetical protein
NCU07210	R3NCU07392_peak_4158	22.7579	6.30563	1651	hypothetical protein
NCU02385	R3NCU07392_peak_5109	10.5579	3.96964	1651	hypothetical protein
NCU00959	R3NCU07392_peak_886	11.4823	3.80527	1655	succinate dehydrogenase iron-sulfur protein
NCU02246	R1NCU07392_peak_883	30.248	6.29665	1656	hypothetical protein
NCU09258	R3NCU07392_peak_1217	11.8604	4.38572	1657	serine/threonine protein kinase
NCU03960	R3NCU07392_peak_4502	23.3736	6.50065	1657	hypothetical protein
NCU08114	R3NCU07392_peak_48	6.50861	3.38822	1657	CDT-2
NCU02074	R3NCU07392_peak_178	14.5748	4.97677	1659	endoplasmic oxidoreductin-1
NCU07586	R1NCU07392_peak_428	11.8596	4.5988	1660	hypothetical protein
NCU02955	R3NCU07392_peak_1126	11.4093	3.92123	1661	elongation factor G 1
NCU04442	R3NCU07392_peak_3012	13.6192	5.10569	1661	GAL10
NCU00797	R3NCU07392_peak_954	7.04424	3.50791	1661	hypothetical protein
NCU08436	R3NCU07392_peak_1807	9.37108	4.00341	1662	alpha/beta hydrolase
NCU06282	R3NCU07392_peak_2967	11.3638	4.05791	1663	hypothetical protein
NCU03057	R3NCU07392_peak_580	31.9505	6.75359	1663	hypothetical protein
NCU01319	R3NCU07392_peak_3794	16.1759	4.96639	1666	hypothetical protein
NCU04561	R3NCU07392_peak_3544	12.5255	4.50754	1669	"melanization defective-1, mld-1"
NCU06895	R3NCU07392_peak_4844	21.6093	6.19883	1669	cytochrome P450 4A5
NCU03561	R3NCU07392_peak_1302	23.2746	5.98516	1670	mitochondrial carrier protein
NCU01565	R3NCU07392_peak_1673	17.3309	5.01541	1670	hypothetical protein
NCU07404	R3NCU07392_peak_822	20.5143	5.62885	1670	alpha-mannosidase
NCU05979	R1NCU07392_peak_788	14.6031	4.84373	1671	hypothetical protein
NCU07021	R3NCU07392_peak_3224	13.5962	4.86593	1672	peptide chain release factor 3
NCU16391	R3NCU07392_peak_686	13.3681	4.89923	1672	hypothetical protein
[truncated: 2,079 more rows]

## Sheet: PP1
Gene_ID	Peak_Number	negLog_10_qVal	Fold_Enrich	Distance_to_ATG	annotation
NCU00854	CBNBSNCU00340_peak_601	28.5636	6.03845	0	hypothetical protein
NCU06085	CBNBSNCU00340_peak_3134	27.5147	6.37608	1	LCCL domain-containing protein
NCU04573	CBNBSNCU00340_peak_2231	21.1976	4.59731	4	hypothetical protein
NCU05613	CBNBSNCU00340_peak_2787	23.0169	5.66352	6	hypothetical protein
NCU05013	CBNBSNCU00340_peak_2976	48.5467	8.65161	7	hypothetical protein
NCU01442	CBNBSNCU00340_peak_2527	12.2777	4.17055	8	DUF1671 domain-containing protein
NCU02917	CBNBSNCU00340_peak_779	40.2211	8.57357	9	hypothetical protein
NCU11353	CBNBSNCU00340_peak_1306	53.2662	10.3815	10	D-xylulose kinase
NCU12075	CBNBSNCU00340_peak_2704	12.1714	3.96227	13	hypothetical protein
NCU03279	CBNBSNCU00340_peak_469	11.8883	3.5425	16	hypothetical protein
NCU05185	CBNBSNCU00340_peak_2094	51.4384	10.1503	17	bifunctional P-450:NADPH-P450 reductase
NCU16848	CBNBSNCU00340_peak_1988	23.6414	5.04341	18	hypothetical protein
NCU08156	CBNBSNCU00340_peak_3233	17.8026	4.92516	21	hypothetical protein
NCU09225	CBNBSNCU00340_peak_532	7.07595	3.03109	23	hypothetical protein
NCU00736	CBNBSNCU00340_peak_644	28.1636	6.70295	23	molybdenum cofactor biosynthetic protein
NCU03906	CBNBSNCU00340_peak_2855	19.2048	4.37654	24	BSD domain-containing protein
NCU00665	CBNBSNCU00340_peak_663	26.1543	6.09281	26	Ser/Thr protein phosphatase
NCU02866	CBNBSNCU00340_peak_796	9.71197	3.27266	27	hypothetical protein
NCU04123	CBNBSNCU00340_peak_2544	12.6095	4.42303	27	hypothetical protein
NCU05602	CBNBSNCU00340_peak_2790	13.5711	4.60355	27	hypothetical protein
NCU03755	CBNBSNCU00340_peak_2293	11.7198	4.03224	28	flavin dependent monooxygenase
NCU03884	CBNBSNCU00340_peak_2850	13.8625	4.58125	28	hypothetical protein
NCU07222	CBNBSNCU00340_peak_2656	35.3792	7.13446	30	hypothetical protein
NCU02452	CBNBSNCU00340_peak_3158	13.9511	4.58822	31	TLDc domain-containing protein 2
NCU07563	CBNBSNCU00340_peak_1572	16.0686	4.85757	32	hypothetical protein
NCU07739	CBNBSNCU00340_peak_2155	42.2349	7.99883	33	YTP1
NCU06135	CBNBSNCU00340_peak_3113	24.038	6.3012	35	hypothetical protein
NCU02976	CBNBSNCU00340_peak_763	8.13016	3.12814	36	hypothetical protein
NCU09746	CBNBSNCU00340_peak_1781	20.6145	5.65215	37	gephyrin
NCU09144	CBNBSNCU00340_peak_496	20.5861	5.64411	39	hypothetical protein
NCU07480	CBNBSNCU00340_peak_48	16.6892	4.92211	40	hypothetical protein
NCU03556	CBNBSNCU00340_peak_882	35.3459	7.49649	43	peroxisomal membrane protein Pmp47
NCU02630	CBNBSNCU00340_peak_305	18.8348	5.00591	47	heat shock protein 78
NCU16337	CBNBSNCU00340_peak_139	15.3775	4.80462	49	hypothetical protein
NCU02737	CBNBSNCU00340_peak_342	40.447	7.97545	50	cation transporter ChaC
NCU06737	CBNBSNCU00340_peak_1029	13.5942	4.93035	50	hypothetical protein
NCU08973	CBNBSNCU00340_peak_1553	32.0945	5.46993	50	SNARE protein Ykt6
NCU04440	CBNBSNCU00340_peak_1899	8.96236	3.82857	50	hypothetical protein
NCU07294	CBNBSNCU00340_peak_1998	25.4429	6.09687	51	hypothetical protein
NCU09289	CBNBSNCU00340_peak_2992	23.6383	5.63256	51	hypothetical protein
NCU00648	CBNBSNCU00340_peak_668	31.7364	6.16075	53	choline transporter
NCU09885	CBNBSNCU00340_peak_557	34.224	6.7253	54	acyl-CoA dehydrogenase
NCU00491	CBNBSNCU00340_peak_1550	9.78174	3.60324	54	hypothetical protein
NCU09665	CBNBSNCU00340_peak_1639	35.9523	8.41287	54	hypothetical protein
NCU08937	CBNBSNCU00340_peak_2626	8.58294	3.59979	57	hypothetical protein
NCU04765	CBNBSNCU00340_peak_2732	41.0636	8.69348	57	hypothetical protein
NCU06867	CBNBSNCU00340_peak_3031	25.7485	6.90539	58	hypothetical protein
NCU06479	CBNBSNCU00340_peak_1336	19.5137	4.94572	59	hypothetical protein
NCU08800	CBNBSNCU00340_peak_2054	30.064	7.28755	59	hypothetical protein
NCU06729	CBNBSNCU00340_peak_2502	16.926	4.91613	59	guanine nucleotide-binding protein alpha-2
NCU08030	CBNBSNCU00340_peak_1952	36.0143	7.44839	60	UDP-glucose 4-epimerase Gal10
NCU05929	CBNBSNCU00340_peak_2932	30.7283	7.4443	61	hypothetical protein
NCU04924	CBNBSNCU00340_peak_1704	44.6658	8.6968	63	"hypothetical protein similar to phosphatidyl synthase, cut-1"
NCU16819	CBNBSNCU00340_peak_1909	15.6009	5.02617	63	hypothetical protein
NCU06428	CBNBSNCU00340_peak_1317	12.2532	4.5037	64	pseudouridine synthase TruD/Pus7
NCU06470	CBNBSNCU00340_peak_1330	14.9467	4.03955	64	hypothetical protein
NCU04413	CBNBSNCU00340_peak_1907	29.4398	6.9192	65	UPF0132 domain-containing protein
NCU09187	CBNBSNCU00340_peak_1234	31.0464	6.60795	66	hypothetical protein
NCU00337	CBNBSNCU00340_peak_1498	26.5659	6.30556	68	nuclear export protein Noc3
NCU09612	CBNBSNCU00340_peak_877	49.2478	9.5913	71	hypothetical protein
NCU07102	CBNBSNCU00340_peak_2687	46.9608	8.06779	72	hypothetical protein
NCU08629	CBNBSNCU00340_peak_862	10.2925	3.57485	74	hypothetical protein
NCU05970	CBNBSNCU00340_peak_2918	25.8007	5.28117	74	hypothetical protein
NCU07501	CBNBSNCU00340_peak_29	25.1971	6.47848	78	hypothetical protein
NCU09547	CBNBSNCU00340_peak_2513	19.2532	5.1999	78	U4/U6.U5 tri-snRNP-associated protein 2
NCU01041	CBNBSNCU00340_peak_2338	14.2597	4.95673	79	mitochondrial metalloendopeptidase OMA1
NCU07833	CBNBSNCU00340_peak_1282	35.7572	7.53911	81	hypothetical protein
NCU00558	CBNBSNCU00340_peak_705	17.0913	4.82213	82	hypothetical protein
NCU17074	CBNBSNCU00340_peak_2735	19.7456	5.25998	84	hypothetical protein
NCU05621	CBNBSNCU00340_peak_2783	30.0139	6.70323	89	hypothetical protein
NCU07564	CBNBSNCU00340_peak_1571	39.0259	6.86603	90	siderophore iron transporter mirC
NCU08341	CBNBSNCU00340_peak_512	23.3897	5.79523	92	CLAP1
NCU02949	CBNBSNCU00340_peak_770	14.3057	4.76623	93	hypothetical protein
NCU08514	CBNBSNCU00340_peak_1141	15.1613	4.83454	94	peptidyl-prolyl isomerase cwc-27
NCU02801	CBNBSNCU00340_peak_811	26.1543	6.05847	98	translocator protein
NCU02006	CBNBSNCU00340_peak_156	15.5157	4.6684	103	hypothetical protein
NCU06608	CBNBSNCU00340_peak_1767	38.7246	7.50086	106	hypothetical protein
NCU08805	CBNBSNCU00340_peak_2053	11.2906	4.13684	106	hypothetical protein
NCU01119	CBNBSNCU00340_peak_2359	8.74951	3.80005	106	lanosterol synthase
NCU08487	CBNBSNCU00340_peak_1149	18.6207	4.7174	108	hypothetical protein
NCU04665	CBNBSNCU00340_peak_2196	16.0694	4.93116	109	hypothetical protein
NCU07105	CBNBSNCU00340_peak_2683	13.6609	4.37567	109	hypothetical protein
NCU00581	CBNBSNCU00340_peak_701	44.1328	8.18612	110	phosphopantetheinyl transferase
NCU06730	CBNBSNCU00340_peak_2505	10.6044	3.93072	110	hypothetical protein
NCU08075	CBNBSNCU00340_peak_7	19.2532	5.1999	111	hypothetical protein
NCU09817	CBNBSNCU00340_peak_372	10.2282	4.15472	111	"DAHP synthase, aro-7"
NCU06159	CBNBSNCU00340_peak_3106	10.9564	3.75934	112	MFS transporter
NCU16779	CBNBSNCU00340_peak_1814	17.0484	5.09884	113	hypothetical protein
NCU07416	CBNBSNCU00340_peak_537	6.49985	3.27828	114	hypothetical protein
NCU07541	CBNBSNCU00340_peak_1578	15.8225	4.52691	116	hypothetical protein
NCU09710	CBNBSNCU00340_peak_3088	6.08865	2.84317	121	prenylcysteine lyase
NCU02631	CBNBSNCU00340_peak_306	15.7684	4.28746	122	DNA replication complex GINS protein psf-1
NCU07583	CBNBSNCU00340_peak_1642	9.7028	4.04894	122	hypothetical protein
NCU07218	CBNBSNCU00340_peak_2658	18.3008	5.2816	122	hypothetical protein
NCU09527	CBNBSNCU00340_peak_2508	15.2588	4.90262	123	hypothetical protein
NCU08145	CBNBSNCU00340_peak_3229	30.0789	6.89145	123	coenzyme A transferase
NCU01059	CBNBSNCU00340_peak_2343	24.0845	5.74548	126	glycosyl hydrolase family 47 protein
NCU04638	CBNBSNCU00340_peak_2207	12.5734	4.22985	128	hypothetical protein
NCU00645	CBNBSNCU00340_peak_672	20.2986	5.24123	129	hypothetical protein
NCU00358	CBNBSNCU00340_peak_1507	22.7862	5.99487	129	hypothetical protein
NCU08253	CBNBSNCU00340_peak_1602	28.7253	7.25379	129	hypothetical protein
NCU03693	CBNBSNCU00340_peak_2276	24.4081	5.90917	129	oxidoreductase
NCU04893	CBNBSNCU00340_peak_1691	26.2107	5.77307	130	hypothetical protein
NCU05558	CBNBSNCU00340_peak_2807	13.6117	3.72648	130	3-ketoacyl-CoA thiolase
NCU07483	CBNBSNCU00340_peak_47	12.7669	4.52117	132	"frost, fr"
NCU00584	CBNBSNCU00340_peak_698	24.3542	5.14908	132	hypothetical protein
NCU06135	CBNBSNCU00340_peak_3113	24.038	6.3012	133	hypothetical protein
NCU07730	CBNBSNCU00340_peak_1789	20.5861	5.58687	137	hypothetical protein
NCU16349	CBNBSNCU00340_peak_200	39.3175	8.37418	139	hypothetical protein
NCU09439	CBNBSNCU00340_peak_3003	16.6892	4.92211	140	RecQ mediated genome instability protein Rmi1
NCU08700	CBNBSNCU00340_peak_1161	24.5711	5.81807	144	hypothetical protein
NCU00380	CBNBSNCU00340_peak_1513	10.4054	3.98682	144	hypothetical protein
NCU02352	CBNBSNCU00340_peak_3181	15.9129	4.40373	144	solute carrier family 25 protein
NCU03479	CBNBSNCU00340_peak_905	10.8689	4.46679	145	endoribonuclease ysh-1
NCU09069	CBNBSNCU00340_peak_74	36.5104	6.08141	146	hypothetical protein
NCU02297	CBNBSNCU00340_peak_3197	30.1809	5.99315	147	hypothetical protein
NCU16461	CBNBSNCU00340_peak_737	30.9025	7.22637	151	hypothetical protein
NCU00608	CBNBSNCU00340_peak_690	24.5711	5.81807	156	AMP-binding enzyme
NCU03344	CBNBSNCU00340_peak_961	8.10601	3.30664	156	hypothetical protein
NCU08303	CBNBSNCU00340_peak_1831	41.4841	7.85855	156	LON domain serine protease
NCU05967	CBNBSNCU00340_peak_2920	30.9368	6.721	156	hypothetical protein
NCU00011	CBNBSNCU00340_peak_1395	28.5755	6.36755	162	hypothetical protein
NCU03209	CBNBSNCU00340_peak_448	20.5611	5.77408	166	chitinase 1
NCU07003	CBNBSNCU00340_peak_2028	38.239	9.04897	166	hypothetical protein
NCU00542	CBNBSNCU00340_peak_711	11.7236	4.20462	167	DUF914 domain membrane protein
NCU02349	CBNBSNCU00340_peak_3183	9.4692	3.81597	167	UDP-glucose:glycoprotein glucosyltransferase
NCU03082	CBNBSNCU00340_peak_405	26.9901	5.88235	168	hypothetical protein
NCU06840	CBNBSNCU00340_peak_1001	28.694	6.76979	171	hypothetical protein
NCU04634	CBNBSNCU00340_peak_2208	22.3206	5.72126	174	isoflavone reductase
NCU06640	CBNBSNCU00340_peak_2468	19.2048	4.40107	174	hypothetical protein
NCU00028	CBNBSNCU00340_peak_1402	26.0473	5.82341	176	S-(hydroxymethyl)glutathione dehydrogenase
NCU08775	CBNBSNCU00340_peak_1626	9.78174	3.60324	176	hypothetical protein
NCU01541	CBNBSNCU00340_peak_1123	20.8428	5.73662	177	hypothetical protein
NCU09887	CBNBSNCU00340_peak_556	39.7444	8.68871	179	Drp1p
NCU16526	CBNBSNCU00340_peak_962	14.7376	4.94217	179	hypothetical protein
NCU04934	CBNBSNCU00340_peak_1709	28.2062	5.83766	179	hypothetical protein
NCU09065	CBNBSNCU00340_peak_70	9.27935	3.60296	180	hypothetical protein
NCU09159	CBNBSNCU00340_peak_1226	10.2925	3.57485	182	hypothetical protein
NCU16856	CBNBSNCU00340_peak_1999	30.0842	6.70322	182	hypothetical protein
NCU05991	CBNBSNCU00340_peak_2910	15.6289	4.61625	182	3-keto-steroid reductase
NCU07947	CBNBSNCU00340_peak_1730	28.1415	6.45087	183	glycolipid transfer protein HET-C2
NCU01042	CBNBSNCU00340_peak_2339	28.694	6.73163	184	hypothetical protein
NCU01645	CBNBSNCU00340_peak_1098	31.9897	7.54346	188	hypothetical protein
NCU01390	CBNBSNCU00340_peak_2454	15.0266	4.68558	188	cell cycle control protein cwf16
NCU03897	CBNBSNCU00340_peak_2853	28.5094	6.40252	188	RNA binding effector protein Scp160
NCU03350	CBNBSNCU00340_peak_957	10.9564	3.75934	190	xanthine dehydrogenase
NCU05597	CBNBSNCU00340_peak_2791	8.67688	3.11321	190	"ascus development-3, asd-3"
NCU02764	CBNBSNCU00340_peak_833	8.92663	3.85762	191	"Round spore, Rsp"
NCU11180	CBNBSNCU00340_peak_1514	19.4818	5.64596	193	patatin-like phospholipase domain-containing protein
NCU08032	CBNBSNCU00340_peak_1953	51.2183	9.39314	196	tRNA-splicing endonuclease subunit sen34
NCU00907	CBNBSNCU00340_peak_590	51.8658	10.0144	197	hypothetical protein
NCU06974	CBNBSNCU00340_peak_2014	16.7243	4.58669	198	histidinol-phosphatase
NCU04230	CBNBSNCU00340_peak_2579	22.1062	6.0238	198	isocitrate lyase
NCU06998	CBNBSNCU00340_peak_2024	28.6125	7.041	201	scavenger mRNA decapping enzyme
NCU01200	CBNBSNCU00340_peak_2390	14.7999	4.71335	201	peptidyl-prolyl cis-trans isomerase B
NCU05253	CBNBSNCU00340_peak_2079	38.1929	6.43311	204	hypothetical protein
NCU01330	CBNBSNCU00340_peak_2434	19.9741	5.64179	204	SacI domain-containing protein
NCU02940	CBNBSNCU00340_peak_772	17.6847	5.1657	205	hypothetical protein
NCU09780	CBNBSNCU00340_peak_2768	7.05001	3.37367	205	hypothetical protein
NCU09318	CBNBSNCU00340_peak_381	31.8086	5.90198	206	ATP-dependent DNA helicase mph-1
NCU04672	CBNBSNCU00340_peak_2189	21.5313	4.80566	206	MatE family transporter
NCU05620	CBNBSNCU00340_peak_2785	44.1395	9.56019	206	proteasome activator subunit 4
NCU01506	CBNBSNCU00340_peak_1132	24.5532	6.12109	208	hypothetical protein
NCU09327	CBNBSNCU00340_peak_377	31.7539	6.13624	209	protein phosphatase
NCU02526	CBNBSNCU00340_peak_248	9.71006	3.32628	211	hypothetical protein
NCU04289	CBNBSNCU00340_peak_2602	13.9725	4.63291	212	hypothetical protein
NCU00800	CBNBSNCU00340_peak_624	10.7581	4.19798	214	hypothetical protein
NCU01530	CBNBSNCU00340_peak_1125	20.6808	5.24999	214	hypothetical protein
NCU02603	CBNBSNCU00340_peak_284	35.6421	7.06439	218	oxidoreductase
NCU02350	CBNBSNCU00340_peak_3182	8.19032	3.79505	219	hypothetical protein
NCU07398	CBNBSNCU00340_peak_542	16.0091	4.68655	220	hypothetical protein
NCU06303	CBNBSNCU00340_peak_1870	5.27154	2.69226	221	alcohol dehydrogenase
NCU01025	CBNBSNCU00340_peak_2334	18.4463	5.24363	222	hypothetical protein
NCU03960	CBNBSNCU00340_peak_2862	11.2906	4.15592	222	hypothetical protein
NCU12126	CBNBSNCU00340_peak_2909	31.1744	5.61533	222	hypothetical protein
NCU07530	CBNBSNCU00340_peak_1579	27.128	5.13707	227	transporter smf2
NCU06369	CBNBSNCU00340_peak_1848	12.421	4.45426	227	oxidoreductase
NCU02067	CBNBSNCU00340_peak_140	13.7199	3.86783	229	mitochondrial inheritance component mdm12
NCU06050	CBNBSNCU00340_peak_3150	16.3152	5.04086	229	hypothetical protein
NCU05814	CBNBSNCU00340_peak_3265	40.0703	8.13193	229	hypothetical protein
NCU00240	CBNBSNCU00340_peak_1457	17.5075	5.07685	230	hypothetical protein
NCU06435	CBNBSNCU00340_peak_1319	12.1607	4.17293	233	VPS9 domain-containing protein
NCU03750	CBNBSNCU00340_peak_2289	7.24512	3.45666	233	calmodulin
NCU05207	CBNBSNCU00340_peak_2088	11.9814	4.62181	234	MFS multidrug transporter
NCU11402	CBNBSNCU00340_peak_843	43.1204	8.08469	235	DUF786 family protein
NCU07810	CBNBSNCU00340_peak_2123	23.168	5.38281	235	hypothetical protein
NCU02055	CBNBSNCU00340_peak_142	45.2408	7.86486	236	uridine nucleosidase Urh1
NCU04585	CBNBSNCU00340_peak_2227	13.7482	4.6772	236	PX domain-containing protein
NCU01339	CBNBSNCU00340_peak_2437	20.5195	4.83408	237	hypothetical protein
NCU00700	CBNBSNCU00340_peak_655	23.0441	6.22656	238	hypothetical protein
NCU02740	CBNBSNCU00340_peak_345	15.7797	4.33325	239	hypothetical protein
NCU01159	CBNBSNCU00340_peak_2372	21.2112	4.97386	239	hypothetical protein
NCU05491	CBNBSNCU00340_peak_2832	47.6272	9.10497	239	hypothetical protein
NCU08643	CBNBSNCU00340_peak_1980	11.2878	4.32698	243	acid phosphatase (pho-3)
NCU03373	CBNBSNCU00340_peak_949	8.69872	3.5171	245	hypothetical protein
NCU16667	CBNBSNCU00340_peak_1449	35.2594	7.28728	246	hypothetical protein
NCU08695	CBNBSNCU00340_peak_1963	14.7844	4.78138	247	hypothetical protein
NCU04501	CBNBSNCU00340_peak_1881	30.0303	7.10554	248	hypothetical protein
NCU11346	CBNBSNCU00340_peak_2006	33.3001	7.81305	249	hypothetical protein
NCU05117	CBNBSNCU00340_peak_2952	30.0128	6.93619	250	DUF1716 domain-containing protein
NCU16363	CBNBSNCU00340_peak_250	23.5421	6.21349	252	hypothetical protein
NCU16651	CBNBSNCU00340_peak_1414	21.3126	5.8324	252	dihydrofolate reductase
NCU00709	CBNBSNCU00340_peak_653	15.6917	4.61607	254	beta-xylosidase
NCU07029	CBNBSNCU00340_peak_2038	16.2823	4.29042	254	hypothetical protein
NCU03502	CBNBSNCU00340_peak_899	25.2296	6.40787	255	hypothetical protein
NCU06574	CBNBSNCU00340_peak_1755	18.6543	5.30205	256	hypothetical protein
NCU01114	CBNBSNCU00340_peak_2358	32.463	6.5917	256	DUF858 domain-containing protein
NCU07954	CBNBSNCU00340_peak_1726	38.5182	7.14257	257	hypothetical protein
NCU07860	CBNBSNCU00340_peak_1297	11.3493	4.19289	258	alpha-glucosidase
NCU00841	CBNBSNCU00340_peak_607	25.3977	6.51751	259	hypothetical protein
NCU00579	CBNBSNCU00340_peak_702	13.322	4.24954	259	oxysterol binding protein 1
NCU00333	CBNBSNCU00340_peak_1497	7.03424	2.67493	259	ADP-ribosylation factor family protein
NCU07465	CBNBSNCU00340_peak_53	11.7198	4.03224	261	mitochondrial phosphate carrier protein 2
NCU03332	CBNBSNCU00340_peak_962	14.7376	4.94217	261	3-oxoacyl-(acyl-carrier-protein) reductase
NCU09098	CBNBSNCU00340_peak_86	34.2959	6.32618	263	tetracycline transporter
NCU10932	CBNBSNCU00340_peak_233	21.0492	5.61353	263	hypothetical protein
NCU04099	CBNBSNCU00340_peak_2533	25.4399	5.69502	263	alpha-methylacyl-CoA racemase
NCU03742	CBNBSNCU00340_peak_2288	12.1401	4.26446	264	hypothetical protein
NCU07207	CBNBSNCU00340_peak_2659	39.2488	7.19361	264	hypothetical protein
NCU06311	CBNBSNCU00340_peak_1869	20.1261	5.86164	265	GMP synthase
NCU03830	CBNBSNCU00340_peak_2322	11.9805	4.19971	265	hypothetical protein
NCU09805	CBNBSNCU00340_peak_365	11.7198	4.03224	267	alpha-amylase
NCU06467	CBNBSNCU00340_peak_1327	24.5537	5.19562	267	hypothetical protein
NCU00332	CBNBSNCU00340_peak_1497	7.03424	2.67493	268	hypothetical protein
NCU10143	CBNBSNCU00340_peak_2528	35.6006	8.048	268	ATPase type 13A2
NCU07471	CBNBSNCU00340_peak_51	20.4917	4.15975	271	F-actin-capping protein subunit beta
NCU00182	CBNBSNCU00340_peak_1444	13.9725	4.59475	271	integral membrane protein
NCU07565	CBNBSNCU00340_peak_1570	16.9465	4.70317	273	von Willebrand RING finger domain-containing protein
NCU17186	CBNBSNCU00340_peak_3070	31.4927	7.72038	273	hypothetical protein
NCU08685	CBNBSNCU00340_peak_1968	22.0511	6.10446	274	phosphoribosylformylglycinamidine synthase
NCU04144	CBNBSNCU00340_peak_2552	8.13016	3.41407	274	sterol O-acyltransferase
NCU06623	CBNBSNCU00340_peak_1775	28.737	6.94877	275	hypothetical protein
NCU07715	CBNBSNCU00340_peak_1794	23.9441	4.58072	276	hypothetical protein
NCU05232	CBNBSNCU00340_peak_2084	21.8879	5.79884	276	AP-2 complex subunit beta
NCU06074	CBNBSNCU00340_peak_3137	16.6157	5.07054	276	hypothetical protein
NCU00633	CBNBSNCU00340_peak_675	29.3942	6.41906	277	hypothetical protein
NCU07994	CBNBSNCU00340_peak_1942	24.4595	6.09509	277	hypothetical protein
NCU00005	CBNBSNCU00340_peak_1392	10.7158	3.74261	280	hypothetical protein
NCU01076	CBNBSNCU00340_peak_2345	14.2575	4.77211	280	hypothetical protein
NCU12084	CBNBSNCU00340_peak_2738	12.1712	4.46728	280	hypothetical protein
NCU05098	CBNBSNCU00340_peak_2958	36.4738	7.82387	280	phosphatidylserine decarboxylase
NCU04901	CBNBSNCU00340_peak_1693	46.833	9.65399	281	hypothetical protein
NCU03115	CBNBSNCU00340_peak_418	10.4781	3.80902	282	"spa2-like, spa2"
NCU00253	CBNBSNCU00340_peak_1464	24.9247	5.60397	282	hypothetical protein
NCU00838	CBNBSNCU00340_peak_609	17.2581	5.74721	283	3-dehydroshikimate dehydratase
NCU03783	CBNBSNCU00340_peak_2303	36.8511	7.23481	283	transmembrane domain transporter
NCU04261	CBNBSNCU00340_peak_2593	19.1058	5.25234	283	hypothetical protein
NCU08935	CBNBSNCU00340_peak_2624	14.7871	4.97868	284	peroxisomal-coenzyme A synthetase
NCU05530	CBNBSNCU00340_peak_2814	9.33064	3.84862	284	hypothetical protein
NCU06114	CBNBSNCU00340_peak_3121	23.8814	5.80695	284	hypothetical protein
NCU04246	CBNBSNCU00340_peak_2585	24.1109	5.27767	285	hypothetical protein
NCU09394	CBNBSNCU00340_peak_3078	8.8065	4.0332	287	hypothetical protein
NCU00532	CBNBSNCU00340_peak_720	14.4981	4.11861	288	hypothetical protein
NCU06342	CBNBSNCU00340_peak_1857	34.4008	7.14572	288	phospholipase D
NCU09758	CBNBSNCU00340_peak_1206	11.0008	4.06912	290	Ras guanine-nucleotide exchange protein
NCU04775	CBNBSNCU00340_peak_2737	25.3591	6.36654	293	nicotinamide N-methyltransferase
NCU16350	CBNBSNCU00340_peak_203	15.0188	4.79238	294	hypothetical protein
NCU08442	CBNBSNCU00340_peak_1188	7.03213	3.5636	294	hypothetical protein
NCU05275	CBNBSNCU00340_peak_2074	19.5137	4.97694	294	ubiquitin fusion protein
NCU03802	CBNBSNCU00340_peak_2309	12.8856	4.48691	294	trimethyllysine dioxygenase
NCU11314	CBNBSNCU00340_peak_1362	23.6813	5.85397	295	CaaX prenyl proteinase Rce1
NCU05767	CBNBSNCU00340_peak_3250	11.2332	4.19526	295	PRO1A C6 Zink-finger protein
NCU03921	CBNBSNCU00340_peak_2857	13.8364	4.28682	296	mitochondrial chaperone bcs1
NCU02794	CBNBSNCU00340_peak_818	35.2631	7.12309	297	Fso1
NCU05880	CBNBSNCU00340_peak_3283	27.3214	6.62564	298	hypothetical protein
NCU03207	CBNBSNCU00340_peak_447	40.1282	8.60965	300	ran GTPase activating protein 1
NCU16501	CBNBSNCU00340_peak_891	15.2128	4.73837	300	hypothetical protein
NCU09010	CBNBSNCU00340_peak_1560	14.8448	4.65243	300	hypothetical protein
NCU05691	CBNBSNCU00340_peak_1252	25.8566	6.39099	302	hypothetical protein
NCU10040	CBNBSNCU00340_peak_2098	20.5861	5.62503	303	hypothetical protein
NCU01392	CBNBSNCU00340_peak_2455	12.1132	4.06823	305	hypothetical protein
NCU01575	CBNBSNCU00340_peak_1114	15.4538	4.77393	306	SNARE complex subunit
NCU08729	CBNBSNCU00340_peak_1175	9.78174	3.5564	306	transcription initiation factor TFIID 23-30kDa subunit
NCU01581	CBNBSNCU00340_peak_1112	27.1481	6.4623	307	hypothetical protein
NCU05845	CBNBSNCU00340_peak_3275	9.3966	3.8125	307	hypothetical protein
NCU05276	CBNBSNCU00340_peak_2073	15.7615	4.63461	308	Yip1 domain family
NCU02901	CBNBSNCU00340_peak_788	31.3112	6.65313	309	hypothetical protein
NCU01657	CBNBSNCU00340_peak_1094	36.983	7.38066	310	cytochrome-c oxidase assembly protein
NCU03111	CBNBSNCU00340_peak_416	34.9419	6.47967	311	hypothetical protein
NCU07326	CBNBSNCU00340_peak_1983	32.4322	7.15144	311	hypothetical protein
NCU09305	CBNBSNCU00340_peak_2985	30.3951	6.92242	311	hypothetical protein
NCU00972	CBNBSNCU00340_peak_565	44.0314	8.41164	312	arabinogalactan endo-1 4-beta-galactosidase
NCU00163	CBNBSNCU00340_peak_1440	6.83104	3.26584	313	"dolichyl pyrophosphate Glc1Man9GlcNAc2 alpha-1,3-glucosyltransferase"
NCU04771	CBNBSNCU00340_peak_2736	16.7972	4.29315	313	fructosyl-amino acid oxidase
NCU01209	CBNBSNCU00340_peak_2393	11.1503	3.945	314	hypothetical protein
NCU05676	CBNBSNCU00340_peak_1242	4.68268	2.43632	316	hypothetical protein
NCU06321	CBNBSNCU00340_peak_1864	20.8634	6.09071	316	hypothetical protein
NCU16364	CBNBSNCU00340_peak_253	37.7401	6.99418	318	hypothetical protein
NCU07964	CBNBSNCU00340_peak_1725	27.6882	6.31405	319	3-oxoacyl-(acyl-carrier-protein) reductase
NCU06106	CBNBSNCU00340_peak_3124	21.2996	5.8798	319	hypothetical protein
NCU05351	CBNBSNCU00340_peak_969	39.3945	7.70408	321	hypothetical protein
NCU02338	CBNBSNCU00340_peak_3187	19.0711	5.01472	321	secreted protein
NCU04197	CBNBSNCU00340_peak_2566	45.6117	8.44144	323	CipC protein
NCU04214	CBNBSNCU00340_peak_2573	11.5645	4.46077	323	hypothetical protein
NCU04776	CBNBSNCU00340_peak_2737	25.3591	6.36654	323	hypothetical protein
NCU09240	CBNBSNCU00340_peak_844	12.8856	4.4286	325	hypothetical protein
NCU02547	CBNBSNCU00340_peak_259	22.3594	5.89358	328	hypothetical protein
NCU00188	CBNBSNCU00340_peak_1445	19.8483	5.32312	329	ATG1 protein
NCU09013	CBNBSNCU00340_peak_1564	14.7432	4.28071	329	UPF0047 domain-containing protein
NCU04662	CBNBSNCU00340_peak_2199	7.65259	3.71243	329	autophagy protein 5
NCU01577	CBNBSNCU00340_peak_1114	15.4538	4.77393	330	hypothetical protein
NCU02847	CBNBSNCU00340_peak_802	10.7435	4.10882	331	hypothetical protein
NCU10766	CBNBSNCU00340_peak_1659	6.02031	3.41791	331	hypothetical protein
NCU16892	CBNBSNCU00340_peak_2081	32.2319	7.59383	333	hypothetical protein
NCU00834	CBNBSNCU00340_peak_611	14.1614	4.84084	334	hypothetical protein
NCU00534	CBNBSNCU00340_peak_718	17.5552	5.18621	334	hypothetical protein
NCU10056	CBNBSNCU00340_peak_3084	18.8053	4.82084	334	hypothetical protein
NCU08079	CBNBSNCU00340_peak_8	6.3733	2.67672	336	hypothetical protein
NCU16681	CBNBSNCU00340_peak_1517	43.5787	7.67308	336	hypothetical protein
NCU07737	CBNBSNCU00340_peak_2156	12.6095	4.42303	336	salicylate hydroxylase
NCU04572	CBNBSNCU00340_peak_2231	21.1976	4.59731	337	hypothetical protein
NCU08366	CBNBSNCU00340_peak_505	48.5218	9.0382	339	hypothetical protein
NCU05838	CBNBSNCU00340_peak_3273	24.4033	6.46905	339	hypothetical protein
NCU08172	CBNBSNCU00340_peak_3239	13.4284	4.40014	340	hypothetical protein
NCU16769	CBNBSNCU00340_peak_1779	22.2497	5.50898	342	flavodoxin and radical SAM domain-containing protein
NCU07699	CBNBSNCU00340_peak_1808	13.6117	3.76327	342	hypothetical protein
NCU17058	CBNBSNCU00340_peak_2676	10.9564	4.26216	342	FF domain-containing protein
NCU03474	CBNBSNCU00340_peak_908	28.1672	6.93099	343	hypothetical protein
NCU17009	CBNBSNCU00340_peak_2494	38.198	7.99709	343	hypothetical protein
NCU16639	CBNBSNCU00340_peak_1345	28.8487	6.30015	345	hypothetical protein
NCU06363	CBNBSNCU00340_peak_1850	33.1174	6.92986	347	hypothetical protein
NCU09412	CBNBSNCU00340_peak_3072	23.2807	6.93354	348	hypothetical protein
NCU05849	CBNBSNCU00340_peak_3278	16.4579	4.72081	348	hypothetical protein
NCU07450	CBNBSNCU00340_peak_59	35.0485	6.80335	350	hypothetical protein
NCU11246	CBNBSNCU00340_peak_472	24.9555	6.70237	351	golgi transport complex subunit Cog4
NCU03583	CBNBSNCU00340_peak_2239	13.9725	4.57567	351	hypothetical protein
NCU04016	CBNBSNCU00340_peak_2878	33.2894	6.62371	351	phosphoglycerate mutase
NCU02413	CBNBSNCU00340_peak_3164	23.8996	6.06885	351	transcription factor prr1
NCU02777	CBNBSNCU00340_peak_826	19.1263	4.73391	352	molybdenum cofactor sulfurase
NCU00643	CBNBSNCU00340_peak_673	16.2331	5.13663	354	L-arabinitol 4-dehydrogenase
NCU05161	CBNBSNCU00340_peak_2097	11.3564	4.63855	354	alpha/beta hydrolase fold-3 domain-containing protein
NCU04918	CBNBSNCU00340_peak_1701	24.7081	6.16493	355	hypothetical protein
NCU05780	CBNBSNCU00340_peak_3256	7.15502	3.3328	355	glutathione transferase
NCU05992	CBNBSNCU00340_peak_2910	15.6289	4.61625	356	hypothetical protein
NCU05914	CBNBSNCU00340_peak_2938	15.378	4.43058	356	hypothetical protein
NCU10237	CBNBSNCU00340_peak_2478	12.8993	4.62354	357	glycerophosphoryl diester phosphodiesterase
NCU00318	CBNBSNCU00340_peak_1485	15.0052	4.58173	358	hypothetical protein
NCU06368	CBNBSNCU00340_peak_1848	12.421	4.45426	358	hypothetical protein
NCU02834	CBNBSNCU00340_peak_807	50.3107	10.077	360	hypothetical protein
NCU06884	CBNBSNCU00340_peak_3038	33.4023	6.58481	360	hypothetical protein
NCU06455	CBNBSNCU00340_peak_1321	33.5648	6.98572	362	hypothetical protein
NCU07615	CBNBSNCU00340_peak_1661	23.2857	6.159	365	hypothetical protein
NCU05275	CBNBSNCU00340_peak_2074	19.5137	4.97694	365	ubiquitin fusion protein
NCU02035	CBNBSNCU00340_peak_150	52.8713	10.3546	366	helix-hairpin-helix domain-containing protein
NCU01987	CBNBSNCU00340_peak_167	21.9193	5.63092	367	hypothetical protein
NCU00839	CBNBSNCU00340_peak_608	23.1118	6.54467	367	hypothetical protein
NCU09704	CBNBSNCU00340_peak_3090	13.0657	4.30704	367	hypothetical protein
NCU04649	CBNBSNCU00340_peak_2203	12.1714	3.97788	369	dehydrase
NCU08784	CBNBSNCU00340_peak_1621	11.0776	4.39439	371	hypothetical protein
NCU03017	CBNBSNCU00340_peak_754	9.14538	3.86695	373	hypothetical protein
NCU00478	CBNBSNCU00340_peak_1546	13.8288	4.75698	373	hypothetical protein
NCU07272	CBNBSNCU00340_peak_2004	18.149	5.61984	374	hypothetical protein
NCU05080	CBNBSNCU00340_peak_2962	19.453	5.68706	374	hypothetical protein
NCU03839	CBNBSNCU00340_peak_2325	6.04126	3.21706	375	APF1
NCU08437	CBNBSNCU00340_peak_1187	18.4973	5.59184	377	hypothetical protein
NCU07559	CBNBSNCU00340_peak_1573	27.0827	5.66026	377	hypothetical protein
NCU17215	CBNBSNCU00340_peak_3133	13.5577	4.49243	377	hypothetical protein
NCU10987	CBNBSNCU00340_peak_817	13.0036	4.27264	379	MFS transporter Fmp42
NCU05619	CBNBSNCU00340_peak_2786	37.4042	7.87639	380	hypothetical protein
NCU00829	CBNBSNCU00340_peak_614	23.3661	5.23126	382	ferric reductase
NCU07849	CBNBSNCU00340_peak_1294	33.2747	7.08286	383	"thiamine-4, thi-4"
NCU04310	CBNBSNCU00340_peak_2612	28.9869	5.9721	383	hypothetical protein
NCU05635	CBNBSNCU00340_peak_2779	15.9834	4.98175	383	hypothetical protein
NCU16372	CBNBSNCU00340_peak_327	39.6445	7.99927	384	hypothetical protein
NCU09876	CBNBSNCU00340_peak_561	32.5827	5.95482	384	hypothetical protein
NCU09589	CBNBSNCU00340_peak_3053	44.8861	8.75908	384	hypothetical protein
NCU06846	CBNBSNCU00340_peak_999	45.5322	8.97755	385	MFS myo-inositol transporter
NCU06864	CBNBSNCU00340_peak_3027	12.7146	4.47393	385	cAMP-independent regulatory protein pac2
NCU10416	CBNBSNCU00340_peak_3252	45.7795	8.30792	385	WSC domain-containing protein
NCU07452	CBNBSNCU00340_peak_58	8.44039	3.81589	386	NADPH dehydrogenase
NCU04133	CBNBSNCU00340_peak_2548	16.0091	4.61932	386	peptidase family M28
NCU09451	CBNBSNCU00340_peak_3007	40.8316	8.81801	386	hypothetical protein
NCU02174	CBNBSNCU00340_peak_94	12.0497	4.52351	387	hypothetical protein
NCU07142	CBNBSNCU00340_peak_2674	27.029	6.62371	388	hypothetical protein
NCU09426	CBNBSNCU00340_peak_3069	18.5934	4.91106	388	hypothetical protein
NCU00475	CBNBSNCU00340_peak_1543	11.6699	4.23213	389	40S ribosomal protein S18
NCU09976	CBNBSNCU00340_peak_217	46.5412	8.99578	390	rhamnogalacturonan acetylesterase
NCU00282	CBNBSNCU00340_peak_1471	10.2722	3.88981	390	hypothetical protein
NCU08224	CBNBSNCU00340_peak_1595	10.9564	3.79056	390	hypothetical protein
NCU08509	CBNBSNCU00340_peak_1146	15.774	3.77581	391	hypothetical protein
NCU08038	CBNBSNCU00340_peak_1955	32.1206	7.11321	391	CAS1
NCU07506	CBNBSNCU00340_peak_28	37.6086	7.83672	392	fumarylacetoacetate hydrolase
NCU07963	CBNBSNCU00340_peak_1725	27.6882	6.31405	393	hypothetical protein
NCU03603	CBNBSNCU00340_peak_2245	39.8179	7.6112	393	cytochrome b5
NCU07472	CBNBSNCU00340_peak_51	20.4917	4.15975	394	"alpha-1,6-mannosyltransferase subunit"
NCU16540	CBNBSNCU00340_peak_991	41.9693	7.45249	396	hypothetical protein
NCU05540	CBNBSNCU00340_peak_2813	23.9186	5.5077	396	hypothetical protein
NCU00872	CBNBSNCU00340_peak_596	23.3803	5.23475	397	hypothetical protein
NCU07602	CBNBSNCU00340_peak_1653	23.0169	5.6807	398	hypothetical protein
NCU06886	CBNBSNCU00340_peak_3039	45.0967	9.28347	398	hypothetical protein
NCU10567	CBNBSNCU00340_peak_1628	14.1738	4.92579	401	hypothetical protein
NCU02838	CBNBSNCU00340_peak_806	36.7135	6.94385	403	hypothetical protein
NCU01779	CBNBSNCU00340_peak_1068	8.73557	3.87663	404	HIRA-interacting protein 5
NCU09810	CBNBSNCU00340_peak_367	22.555	5.82264	405	succinyl-CoA synthetase subunit alpha
NCU00851	CBNBSNCU00340_peak_603	16.082	4.99141	407	hypothetical protein
NCU05572	CBNBSNCU00340_peak_2801	16.7515	4.59337	407	hypothetical protein
NCU03500	CBNBSNCU00340_peak_900	27.0173	6.44544	408	aminotransferase
NCU00321	CBNBSNCU00340_peak_1490	44.0208	7.33824	408	hypothetical protein
NCU16854	CBNBSNCU00340_peak_1995	11.4285	4.21698	409	hypothetical protein
NCU06667	CBNBSNCU00340_peak_2483	25.0381	6.55539	409	hypothetical protein
NCU02486	CBNBSNCU00340_peak_231	12.4174	4.13464	411	hypothetical protein
NCU07671	CBNBSNCU00340_peak_1819	50.1322	9.42181	411	hypothetical protein
NCU08031	CBNBSNCU00340_peak_1952	36.0143	7.44839	412	paxneb protein superfamily
NCU06596	CBNBSNCU00340_peak_1763	17.2268	5.03586	413	hypothetical protein
NCU04466	CBNBSNCU00340_peak_1890	26.6318	5.96577	413	cyanamide hydratase
NCU09886	CBNBSNCU00340_peak_557	34.224	6.7253	414	hypothetical protein
NCU16320	CBNBSNCU00340_peak_88	32.8331	5.53861	415	hypothetical protein
NCU16450	CBNBSNCU00340_peak_701	44.1328	8.18612	415	hypothetical protein
NCU07931	CBNBSNCU00340_peak_1734	16.2044	4.22447	415	glyoxylate reductase
NCU05229	CBNBSNCU00340_peak_2085	18.8053	4.83645	415	hypothetical protein
NCU06167	CBNBSNCU00340_peak_3101	18.2523	5.85186	415	MFS monocarboxylate transporter
NCU02786	CBNBSNCU00340_peak_821	30.7139	6.87123	416	hypothetical protein
NCU00280	CBNBSNCU00340_peak_1468	12.6309	4.37201	416	hypothetical protein
NCU02776	CBNBSNCU00340_peak_826	19.1263	4.73391	419	cell division control protein Cdc6
NCU08853	CBNBSNCU00340_peak_2111	16.9118	5.45722	419	hypothetical protein
NCU03298	CBNBSNCU00340_peak_477	25.4747	5.67205	420	hypothetical protein
NCU06513	CBNBSNCU00340_peak_1742	12.2532	4.52516	420	hypothetical protein
NCU04916	CBNBSNCU00340_peak_1700	22.7946	5.92631	421	hypothetical protein
NCU08510	CBNBSNCU00340_peak_1144	24.8882	6.10532	425	hypothetical protein
NCU06582	CBNBSNCU00340_peak_1757	21.0171	5.78664	426	hypothetical protein
NCU07428	CBNBSNCU00340_peak_66	19.1401	5.3582	427	"copper transporter, tcu-3"
NCU03127	CBNBSNCU00340_peak_423	15.3775	4.78554	428	urease Ure
NCU16645	CBNBSNCU00340_peak_1364	26.9566	6.10998	428	hypothetical protein
NCU09295	CBNBSNCU00340_peak_2991	8.9189	3.93854	428	hypothetical protein
NCU02480	CBNBSNCU00340_peak_228	15.9758	4.83124	429	short-chain dehydrogenase/reductase
NCU04661	CBNBSNCU00340_peak_2201	9.66492	4.05707	430	hypothetical protein
NCU06624	CBNBSNCU00340_peak_1775	28.737	6.94877	431	CLC voltage-gated chloride channel protein
NCU06817	CBNBSNCU00340_peak_1009	23.4231	5.35954	432	hypothetical protein
NCU03814	CBNBSNCU00340_peak_2316	11.9445	4.23224	432	"leucine-5, leu-5"
NCU11341	CBNBSNCU00340_peak_2675	26.9901	5.89795	433	translation initiation factor eIF-2B
NCU08542	CBNBSNCU00340_peak_1610	23.7446	6.10201	436	hypothetical protein
NCU08795	CBNBSNCU00340_peak_1617	13.7199	3.88104	436	Ser/Thr protein phosphatase
NCU04755	CBNBSNCU00340_peak_2727	19.3341	5.7355	439	protein kinase domain-containing protein ppk32
NCU05048	CBNBSNCU00340_peak_2968	53.2662	10.3395	439	hypothetical protein
NCU09413	CBNBSNCU00340_peak_3071	26.7166	7.3895	439	hypothetical protein
NCU06126	CBNBSNCU00340_peak_3117	14.5777	4.63132	439	hypothetical protein
NCU04882	CBNBSNCU00340_peak_1689	39.4792	7.9734	440	hypothetical protein
NCU07727	CBNBSNCU00340_peak_1790	43.7135	8.58918	440	COPI-coated vesicle protein
NCU03599	CBNBSNCU00340_peak_2243	17.4089	4.72718	442	hypothetical protein
NCU09988	CBNBSNCU00340_peak_3010	24.2143	6.19604	442	hypothetical protein
NCU06915	CBNBSNCU00340_peak_3046	10.0158	3.98421	443	hypothetical protein
NCU00456	CBNBSNCU00340_peak_1537	18.4408	5.49085	444	hypothetical protein
NCU06845	CBNBSNCU00340_peak_999	45.5322	8.97755	445	short chain dehydrogenase/reductase
NCU09674	CBNBSNCU00340_peak_2182	25.629	6.12792	445	O-methyltransferase family 3
NCU03294	CBNBSNCU00340_peak_475	18.1057	5.47216	446	hypothetical protein
NCU02318	CBNBSNCU00340_peak_3191	13.1199	3.82821	446	hypothetical protein
NCU16633	CBNBSNCU00340_peak_1335	14.9881	4.59375	447	hypothetical protein
NCU03767	CBNBSNCU00340_peak_2300	30.9621	6.28821	447	mitochondrial chaperone bcs1
NCU02088	CBNBSNCU00340_peak_132	19.1058	5.25234	449	hypothetical protein
NCU00818	CBNBSNCU00340_peak_617	38.4007	7.14678	449	hypothetical protein
NCU01036	CBNBSNCU00340_peak_2337	21.9369	5.04872	451	DUF907 domain-containing protein
NCU06693	CBNBSNCU00340_peak_2490	13.7199	3.85463	451	hypothetical protein
NCU08402	CBNBSNCU00340_peak_1181	44.8995	9.26732	452	zinc-binding alcohol dehydrogenase
NCU07507	CBNBSNCU00340_peak_28	37.6086	7.83672	453	hypothetical protein
NCU16327	CBNBSNCU00340_peak_99	13.3947	4.55079	453	hypothetical protein
NCU16771	CBNBSNCU00340_peak_1781	20.6145	5.65215	457	Rpp14 family protein
NCU08838	CBNBSNCU00340_peak_2041	41.1504	8.33168	458	hypothetical protein
NCU09383	CBNBSNCU00340_peak_352	12.4534	3.61609	459	hypothetical protein
NCU00799	CBNBSNCU00340_peak_624	10.7581	4.19798	460	homocysteine S-methyltransferase
NCU00135	CBNBSNCU00340_peak_1433	40.3963	7.19691	460	phosphatidyl synthase
NCU08687	CBNBSNCU00340_peak_1967	15.0052	4.5989	460	galactokinase
NCU05966	CBNBSNCU00340_peak_2920	30.9368	6.721	460	DNA repair protein
NCU00218	CBNBSNCU00340_peak_1450	19.5137	4.94572	464	ADP-ribosylation factor family protein
NCU17181	CBNBSNCU00340_peak_3056	40.4757	7.75843	466	hypothetical protein
NCU11234	CBNBSNCU00340_peak_254	17.9993	5.29515	468	translation initiation protein Sua5
NCU01257	CBNBSNCU00340_peak_2408	15.5475	4.83718	468	hypothetical protein
NCU07138	CBNBSNCU00340_peak_2675	26.9901	5.89795	468	hypothetical protein
NCU03159	CBNBSNCU00340_peak_430	26.9901	5.85112	469	3' exoribonuclease
NCU00899	CBNBSNCU00340_peak_592	24.2919	5.68701	469	hypothetical protein
NCU04232	CBNBSNCU00340_peak_2582	40.7017	9.14279	469	hypothetical protein
NCU04708	CBNBSNCU00340_peak_2710	42.8571	9.11752	469	hypothetical protein
NCU08456	CBNBSNCU00340_peak_1155	22.5543	4.75676	470	hypothetical protein
NCU09908	CBNBSNCU00340_peak_1	49.4557	8.6197	472	hypothetical protein
NCU00136	CBNBSNCU00340_peak_1434	11.766	3.81101	472	mitochondrial translation optimization protein
NCU07594	CBNBSNCU00340_peak_1650	16.6157	5.07054	474	hypothetical protein
NCU01162	CBNBSNCU00340_peak_2374	28.6125	7.08331	475	glycolipid-anchored surface protein 5
NCU03785	CBNBSNCU00340_peak_2304	9.33074	3.65191	477	hypothetical protein
NCU08476	CBNBSNCU00340_peak_1152	35.7355	6.02008	478	hypothetical protein
NCU07798	CBNBSNCU00340_peak_2126	9.22323	3.10028	479	hypothetical protein
NCU03808	CBNBSNCU00340_peak_2312	16.7243	4.58669	479	pre-mRNA-splicing factor ATP-dependent RNA helicase PRP16
NCU09112	CBNBSNCU00340_peak_487	27.4494	6.35885	480	hypothetical protein
NCU06669	CBNBSNCU00340_peak_2484	33.5648	6.91704	480	hypothetical protein
NCU07588	CBNBSNCU00340_peak_1645	35.2476	8.0453	481	hypothetical protein
NCU04953	CBNBSNCU00340_peak_1712	32.8331	5.59585	482	penicillopepsin
NCU02888	CBNBSNCU00340_peak_790	17.4089	4.71157	484	hypothetical protein
NCU01460	CBNBSNCU00340_peak_2523	17.7653	4.5622	485	hypothetical protein
NCU08053	CBNBSNCU00340_peak_2	22.6822	5.29843	487	hypothetical protein
NCU00492	CBNBSNCU00340_peak_1551	15.7684	4.27316	488	hypothetical protein
NCU08126	CBNBSNCU00340_peak_3223	26.0533	5.08792	490	D-lactate dehydrogenase
NCU07753	CBNBSNCU00340_peak_2147	24.838	6.23911	491	hypothetical protein
NCU08282	CBNBSNCU00340_peak_1837	9.87259	3.7575	493	hypothetical protein
NCU08273	CBNBSNCU00340_peak_1839	34.4365	7.8689	493	plasma membrane channel protein
NCU07759	CBNBSNCU00340_peak_2146	43.7119	9.15278	494	hypothetical protein
NCU02310	CBNBSNCU00340_peak_3194	13.7289	4.4864	494	hypothetical protein
NCU01109	CBNBSNCU00340_peak_2356	12.0419	4.44718	496	hypothetical protein
NCU06895	CBNBSNCU00340_peak_3042	33.9709	8.01727	496	cytochrome P450 4A5
NCU00781	CBNBSNCU00340_peak_632	13.0036	4.2383	499	hypothetical protein
NCU06322	CBNBSNCU00340_peak_1863	13.0036	4.2383	499	DNA replication complex GINS protein psf-2
NCU07795	CBNBSNCU00340_peak_2129	34.4125	7.03723	499	DUF1665 domain-containing protein
NCU03192	CBNBSNCU00340_peak_443	34.2027	5.92196	500	hypothetical protein
NCU06396	CBNBSNCU00340_peak_1842	11.9459	3.65649	500	Got1 family protein
NCU07985	CBNBSNCU00340_peak_1933	29.0185	6.66574	500	MFS transporter
NCU08667	CBNBSNCU00340_peak_1975	24.6353	4.94074	502	hypothetical protein
NCU10696	CBNBSNCU00340_peak_4	19.5137	4.9145	503	RO10
NCU01306	CBNBSNCU00340_peak_2428	44.2676	8.01544	503	hypothetical protein
NCU05069	CBNBSNCU00340_peak_2963	15.3775	4.88094	503	FAD dependent oxidoreductase
NCU16901	CBNBSNCU00340_peak_2095	24.7274	4.4438	504	hypothetical protein
NCU02725	CBNBSNCU00340_peak_340	8.54411	3.67682	505	hypothetical protein
NCU16500	CBNBSNCU00340_peak_878	18.6543	5.28337	505	hypothetical protein
NCU08723	CBNBSNCU00340_peak_1172	39.6445	7.99927	506	hypothetical protein
NCU04092	CBNBSNCU00340_peak_2902	12.1607	4.20833	506	N-acylethanolamine amidohydrolase
NCU01800	CBNBSNCU00340_peak_1056	45.4609	8.62455	507	37S ribosomal protein S5
NCU04595	CBNBSNCU00340_peak_2225	27.0173	6.44544	507	serine/threonine-protein kinase BUD32
NCU05761	CBNBSNCU00340_peak_3247	11.0386	4.30901	507	hypothetical protein
NCU07991	CBNBSNCU00340_peak_1941	22.1519	5.81582	511	DUF292 domain-containing protein
NCU10388	CBNBSNCU00340_peak_1143	30.5768	7.02965	513	peptidyl-prolyl cis-trans isomerase-like 3
NCU08785	CBNBSNCU00340_peak_1620	11.1318	4.15088	514	feruloyl esterase
NCU01283	CBNBSNCU00340_peak_2421	15.2599	4.75175	515	hypothetical protein
NCU01780	CBNBSNCU00340_peak_1068	8.73557	3.87663	517	hypothetical protein
NCU07038	CBNBSNCU00340_peak_2039	36.568	8.06842	517	hypothetical protein
NCU05750	CBNBSNCU00340_peak_3245	31.1769	7.46173	517	ribonuclease H
NCU08626	CBNBSNCU00340_peak_861	17.0017	4.59569	519	"photoreactivation-deficient, phr"
NCU07247	CBNBSNCU00340_peak_2647	34.3342	7.95944	519	DUF6 domain-containing protein
NCU01525	CBNBSNCU00340_peak_1126	28.0146	5.4793	520	histone deacetylase hda1
NCU05961	CBNBSNCU00340_peak_2921	40.382	7.65216	520	DUF572 domain-containing protein
NCU00305	CBNBSNCU00340_peak_1479	9.21109	3.47835	521	short chain dehydrogenase
NCU02046	CBNBSNCU00340_peak_147	17.7532	4.50196	523	hypothetical protein
NCU08981	CBNBSNCU00340_peak_1556	36.991	7.46423	523	dml-1
NCU08794	CBNBSNCU00340_peak_1617	13.7199	3.88104	524	UPF0041 domain-containing protein
NCU04581	CBNBSNCU00340_peak_2229	20.2617	5.03109	525	kinesin
NCU05960	CBNBSNCU00340_peak_2922	34.2666	6.70383	525	GPI mannosyltransferase 2
NCU02954	CBNBSNCU00340_peak_769	31.5837	5.26757	526	homoisocitrate dehydrogenase
NCU06194	CBNBSNCU00340_peak_1360	18.6414	5.00616	527	MBOAT family protein
NCU04496	CBNBSNCU00340_peak_1884	51.126	9.65287	527	hypothetical protein
NCU07013	CBNBSNCU00340_peak_2031	12.3568	4.10093	527	hypothetical protein
NCU04207	CBNBSNCU00340_peak_2570	13.3862	5.01298	527	mechanosensitive ion channel family protein
NCU09813	CBNBSNCU00340_peak_369	22.2949	5.6688	528	SMT3
NCU03686	CBNBSNCU00340_peak_2271	12.3568	4.10093	529	"oxidase assembly protein 2, lah-3"
NCU01158	CBNBSNCU00340_peak_2372	21.2112	4.97386	529	hypothetical protein
NCU01653	CBNBSNCU00340_peak_1095	27.0252	5.82838	531	hypothetical protein
NCU06316	CBNBSNCU00340_peak_1866	16.2039	5.2559	532	hypothetical protein
NCU04444	CBNBSNCU00340_peak_1896	19.2532	5.13121	532	hypothetical protein
NCU05651	CBNBSNCU00340_peak_2776	16.6463	4.09444	534	lectin 2b
NCU02280	CBNBSNCU00340_peak_3201	12.5499	4.41431	535	NADH:ubiquinone oxidoreductase 21.3kD subunit B
NCU06140	CBNBSNCU00340_peak_3112	46.7274	9.17568	537	hypothetical protein
NCU01843	CBNBSNCU00340_peak_1032	17.6847	5.20413	540	T-complex protein 1 subunit gamma
NCU06890	CBNBSNCU00340_peak_3040	38.3049	7.99086	540	hypothetical protein
NCU03717	CBNBSNCU00340_peak_2284	37.29	6.1918	541	translation initiation factor 4E
NCU01801	CBNBSNCU00340_peak_1056	45.4609	8.62455	543	hypothetical protein
NCU00804	CBNBSNCU00340_peak_622	35.4982	7.87785	545	hypothetical protein
NCU05306	CBNBSNCU00340_peak_2067	10.1527	3.94712	545	hypothetical protein
NCU01388	CBNBSNCU00340_peak_2453	17.6847	5.1657	545	"alpha-1,2-mannosyltransferase"
NCU06700	CBNBSNCU00340_peak_2492	6.87317	3.43326	546	alpha/beta hydrolase
NCU09228	CBNBSNCU00340_peak_533	47.8025	8.24033	547	aminopeptidase 2
NCU00304	CBNBSNCU00340_peak_1479	9.21109	3.47835	547	hypothetical protein
NCU08024	CBNBSNCU00340_peak_1950	28.5456	6.57493	547	mannan polymerase II complex ANP1 subunit
NCU04627	CBNBSNCU00340_peak_2210	30.4838	6.50185	547	hypothetical protein
NCU02536	CBNBSNCU00340_peak_253	37.7401	6.99418	548	ubiquinone biosynthesis monooxygenase COQ6
NCU04067	CBNBSNCU00340_peak_2899	9.53941	3.56654	548	hypothetical protein
NCU07823	CBNBSNCU00340_peak_1275	9.87259	3.7575	549	scytalone dehydratase
NCU06472	CBNBSNCU00340_peak_1331	17.2513	4.56803	549	histone acetyltransferase type B catalytic subunit
NCU07892	CBNBSNCU00340_peak_1741	13.6829	4.76795	549	hypothetical protein
NCU04068	CBNBSNCU00340_peak_2899	9.53941	3.56654	549	60S ribosomal protein L6
NCU03114	CBNBSNCU00340_peak_417	23.7446	6.02569	550	SSU72
NCU05116	CBNBSNCU00340_peak_2952	30.0128	6.93619	550	phosphoglycerate mutase
NCU05823	CBNBSNCU00340_peak_3268	19.0543	5.35792	552	hypothetical protein
NCU06703	CBNBSNCU00340_peak_2493	42.2349	7.91297	553	calcium channel subunit Mid1
NCU04813	CBNBSNCU00340_peak_2748	20.7303	5.68453	554	hypothetical protein
NCU05924	CBNBSNCU00340_peak_2934	12.8099	4.26141	555	"endo-1,4-beta-xylanase"
NCU16715	CBNBSNCU00340_peak_1623	17.1999	5.20178	556	hypothetical protein
NCU02614	CBNBSNCU00340_peak_293	19.9324	5.89937	560	peptidyl-prolyl cis-trans isomerase H
NCU07288	CBNBSNCU00340_peak_2000	39.4218	7.19278	560	hypothetical protein
NCU02320	CBNBSNCU00340_peak_3190	20.0466	4.23729	561	hypothetical protein
NCU03346	CBNBSNCU00340_peak_959	10.0158	3.98421	562	hypothetical protein
NCU02164	CBNBSNCU00340_peak_102	19.317	4.79209	563	hypothetical protein
NCU07330	CBNBSNCU00340_peak_1982	19.6785	5.47164	563	endosomal integral membrane protein
NCU01311	CBNBSNCU00340_peak_2430	13.7089	4.10682	563	hypothetical protein
NCU11253	CBNBSNCU00340_peak_3216	26.6946	6.24886	564	glyoxalase
NCU06473	CBNBSNCU00340_peak_1331	17.2513	4.56803	565	ZIP metal ion transporter
NCU04594	CBNBSNCU00340_peak_2225	27.0173	6.44544	565	4-carboxymuconolactone decarboxylase
NCU06457	CBNBSNCU00340_peak_1322	19.8483	5.34081	566	asparaginyl-tRNA synthetase
NCU02263	CBNBSNCU00340_peak_3205	13.0036	4.28981	566	Sec14 cytosolic factor
NCU08271	CBNBSNCU00340_peak_1840	24.234	6.25699	567	GTP-binding protein yptV5
NCU02291	CBNBSNCU00340_peak_3199	9.71197	3.28493	567	glutaryl-CoA dehydrogenase
NCU03558	CBNBSNCU00340_peak_881	10.9564	3.74373	569	hypothetical protein
NCU07000	CBNBSNCU00340_peak_2026	11.7476	4.09621	569	hypothetical protein
NCU08829	CBNBSNCU00340_peak_2045	33.6197	7.68449	569	hypothetical protein
NCU00862	CBNBSNCU00340_peak_598	36.2363	7.25514	570	hypothetical protein
NCU05953	CBNBSNCU00340_peak_2924	28.5176	6.76171	571	hypothetical protein
NCU02408	CBNBSNCU00340_peak_3166	11.7511	4.35564	571	fatty acid desaturase
NCU05401	CBNBSNCU00340_peak_978	9.3643	3.66132	574	hypothetical protein
NCU02772	CBNBSNCU00340_peak_830	31.0464	6.60795	577	hypothetical protein
NCU00245	CBNBSNCU00340_peak_1460	24.2919	5.70341	577	hypothetical protein
NCU01113	CBNBSNCU00340_peak_2357	23.1056	5.68627	578	hypothetical protein
NCU02541	CBNBSNCU00340_peak_256	7.12094	3.29533	579	oligosaccharyltransferase alpha subunit
NCU06427	CBNBSNCU00340_peak_1316	19.3062	4.99109	579	hypothetical protein
NCU04442	CBNBSNCU00340_peak_1898	19.8161	5.45332	579	GAL10
NCU05912	CBNBSNCU00340_peak_2939	11.5645	4.48224	579	hypothetical protein
NCU02398	CBNBSNCU00340_peak_3168	30.9177	6.55458	581	hypothetical protein
NCU05834	CBNBSNCU00340_peak_3271	15.6972	4.75395	583	hypothetical protein
NCU08919	CBNBSNCU00340_peak_2163	15.5123	4.29319	584	SNF2 family helicase/ATPase
NCU16411	CBNBSNCU00340_peak_550	44.1628	8.35333	585	hypothetical protein
NCU00181	CBNBSNCU00340_peak_1444	13.9725	4.59475	585	peptidyl-prolyl cis-trans isomerase-like 2
NCU00471	CBNBSNCU00340_peak_1540	39.4792	8.02944	586	hypothetical protein
NCU04052	CBNBSNCU00340_peak_2891	22.6561	5.13458	586	hypothetical protein
NCU09391	CBNBSNCU00340_peak_3080	16.082	5.09091	588	phenylalanine ammonia-lyase
NCU03988	CBNBSNCU00340_peak_2872	14.6659	4.27641	589	60S ribosomal protein L18
NCU07153	CBNBSNCU00340_peak_2669	19.9324	5.89937	590	glutamate carboxypeptidase
NCU09862	CBNBSNCU00340_peak_2904	12.6095	4.42303	590	ubiquinone biosynthesis methyltransferase coq5
NCU03199	CBNBSNCU00340_peak_445	11.3116	3.35212	593	ATP synthase subunit H
NCU01785	CBNBSNCU00340_peak_1067	8.10703	3.17418	594	hypothetical protein
NCU07608	CBNBSNCU00340_peak_1657	29.8405	7.27258	594	ribose 5-phosphate isomerase A
NCU04560	CBNBSNCU00340_peak_2235	7.99202	3.92141	594	hypothetical protein
NCU07653	CBNBSNCU00340_peak_1675	14.3288	3.99992	595	hypothetical protein
NCU16825	CBNBSNCU00340_peak_1944	30.4472	7.07871	596	hypothetical protein
NCU01443	CBNBSNCU00340_peak_2526	13.4713	4.41226	596	seryl-tRNA synthetase
NCU05774	CBNBSNCU00340_peak_3253	12.3568	4.18679	598	hypothetical protein
NCU16362	CBNBSNCU00340_peak_245	41.356	7.82712	599	hypothetical protein
NCU09578	CBNBSNCU00340_peak_3058	11.7641	4.25411	599	hypothetical protein
NCU05621	CBNBSNCU00340_peak_2782	10.6473	4.07961	601	hypothetical protein
NCU02664	CBNBSNCU00340_peak_323	12.8099	4.24371	603	hypothetical protein
NCU06200	CBNBSNCU00340_peak_1365	13.1918	4.14276	604	DUF1682 domain-containing protein
NCU08869	CBNBSNCU00340_peak_2104	10.3434	4.17237	607	hypothetical protein
NCU09479	CBNBSNCU00340_peak_1210	38.3049	7.89547	608	hypothetical protein
NCU08753	CBNBSNCU00340_peak_1631	28.1797	6.62838	608	hypothetical protein
NCU05386	CBNBSNCU00340_peak_973	17.5552	5.20529	609	hypothetical protein
NCU00052	CBNBSNCU00340_peak_1410	18.8053	4.82084	609	alpha-methylacyl-CoA racemase
NCU07599	CBNBSNCU00340_peak_1652	26.3517	6.43395	610	hypothetical protein
NCU04915	CBNBSNCU00340_peak_1699	42.0095	8.73492	610	hypothetical protein
NCU08017	CBNBSNCU00340_peak_1949	9.86527	3.57826	611	hypothetical protein
NCU07019	CBNBSNCU00340_peak_2032	3.74379	2.47929	612	COP9 signalosome complex subunit 6
NCU08885	CBNBSNCU00340_peak_2172	48.1043	9.1983	612	hypothetical protein
NCU16406	CBNBSNCU00340_peak_527	12.3568	4.15244	613	hypothetical protein
NCU06934	CBNBSNCU00340_peak_3048	38.7491	7.65888	614	hypothetical protein
NCU06302	CBNBSNCU00340_peak_1871	26.5538	6.50911	615	hypothetical protein
NCU08934	CBNBSNCU00340_peak_2624	14.7871	4.97868	615	hypothetical protein
NCU03541	CBNBSNCU00340_peak_888	12.0848	4.39998	617	hypothetical protein
NCU06190	CBNBSNCU00340_peak_1359	17.5466	4.99594	619	hypothetical protein
NCU10776	CBNBSNCU00340_peak_3200	8.13016	3.46559	621	DNA-repair protein rad2
NCU02798	CBNBSNCU00340_peak_815	15.1613	4.9132	622	hypothetical protein
NCU01891	CBNBSNCU00340_peak_198	24.2749	6.03077	624	hypothetical protein
NCU04398	CBNBSNCU00340_peak_1910	19.3062	4.99109	625	hypothetical protein
NCU03019	CBNBSNCU00340_peak_753	17.0741	5.35284	626	hypothetical protein
NCU03374	CBNBSNCU00340_peak_949	8.69872	3.5171	626	hypothetical protein
NCU06772	CBNBSNCU00340_peak_1018	17.2747	4.20482	627	hypothetical protein
NCU07714	CBNBSNCU00340_peak_1794	23.9441	4.58072	627	hypothetical protein
NCU06170	CBNBSNCU00340_peak_3100	40.6306	8.42441	628	hypothetical protein
NCU07202	CBNBSNCU00340_peak_2661	30.3261	7.19191	629	hypothetical protein
NCU06064	CBNBSNCU00340_peak_3140	22.2304	6.10237	629	hypothetical protein
NCU00963	CBNBSNCU00340_peak_568	11.0933	3.98073	630	methylenetetrahydrofolate dehydrogenase
NCU04648	CBNBSNCU00340_peak_2203	12.1714	3.97788	630	glutamine-dependent NAD(+) synthetase
NCU05681	CBNBSNCU00340_peak_1247	16.8202	5.01449	632	hypothetical protein
NCU09734	CBNBSNCU00340_peak_1785	25.5739	6.2387	633	hypothetical protein
NCU01979	CBNBSNCU00340_peak_168	34.2027	5.86063	634	catechol dioxygenase
NCU02579	CBNBSNCU00340_peak_272	44.2676	8.01544	635	FAS1 domain-containing protein
NCU00411	CBNBSNCU00340_peak_1523	18.5393	5.434	635	hypothetical protein
NCU06485	CBNBSNCU00340_peak_1339	11.6676	4.05168	636	hypothetical protein
NCU09075	CBNBSNCU00340_peak_75	18.442	4.63375	638	hypothetical protein
NCU02975	CBNBSNCU00340_peak_763	8.13016	3.12814	638	hypothetical protein
NCU08652	CBNBSNCU00340_peak_1977	23.7906	5.73221	639	hypothetical protein
NCU06418	CBNBSNCU00340_peak_1310	11.9034	4.15878	641	ATP-dependent RNA helicase dbp-8
NCU08101	CBNBSNCU00340_peak_18	10.3036	4.07758	642	hypothetical protein
NCU03398	CBNBSNCU00340_peak_943	20.7371	5.37161	642	hypothetical protein
NCU05596	CBNBSNCU00340_peak_2792	12.5478	4.32825	642	hypothetical protein
NCU09577	CBNBSNCU00340_peak_3059	16.6148	5.27641	642	hypothetical protein
NCU04804	CBNBSNCU00340_peak_2744	39.5981	7.67258	643	hypothetical protein
NCU08134	CBNBSNCU00340_peak_3226	13.1918	4.19078	644	hypothetical protein
NCU01809	CBNBSNCU00340_peak_1053	8.54411	3.63946	646	AAA family ATPase/60S ribosome export protein Rix7
NCU07726	CBNBSNCU00340_peak_1791	32.6249	6.51624	647	bcp-1
NCU02842	CBNBSNCU00340_peak_804	18.1044	4.77401	648	hypothetical protein
NCU01199	CBNBSNCU00340_peak_2390	14.7999	4.71335	648	SNARE domain-containing protein
NCU08550	CBNBSNCU00340_peak_1606	14.5777	4.61315	649	hypothetical protein
NCU01267	CBNBSNCU00340_peak_2413	29.0887	6.66563	649	palmitoyltransferase PFA3
NCU04097	CBNBSNCU00340_peak_2531	29.2403	5.64257	651	ABC transporter
NCU03347	CBNBSNCU00340_peak_959	10.0158	3.98421	652	kynurenine-oxoglutarate transaminase 1
NCU06690	CBNBSNCU00340_peak_2487	23.168	5.44526	652	hypothetical protein
NCU09534	CBNBSNCU00340_peak_2510	24.4311	5.76492	652	peroxiredoxin HYR1
NCU04100	CBNBSNCU00340_peak_2534	18.7635	5.5612	652	vacuolar sorting protein 1
NCU07146	CBNBSNCU00340_peak_2671	35.4131	7.79353	652	hypothetical protein
NCU01949	CBNBSNCU00340_peak_180	18.1198	4.87317	656	40S ribosomal protein S9
NCU01034	CBNBSNCU00340_peak_2336	11.6453	4.23724	656	hypothetical protein
NCU00735	CBNBSNCU00340_peak_644	28.1636	6.70295	657	hypothetical protein
NCU06206	CBNBSNCU00340_peak_1367	31.7539	6.13624	658	hypothetical protein
NCU03756	CBNBSNCU00340_peak_2294	10.2925	3.51761	658	aromatic amino acid aminotransferase 1
NCU06347	CBNBSNCU00340_peak_1854	15.0052	4.51304	659	actin cytoskeleton-regulatory complex protein end-3
NCU07053	CBNBSNCU00340_peak_2701	13.8364	4.25481	659	aldehyde dehydrogenase
NCU01427	CBNBSNCU00340_peak_2464	39.2642	8.83293	661	"albino-3, al-3"
NCU05499	CBNBSNCU00340_peak_2827	12.6298	3.88706	661	"homogentisate 1,2-dioxygenase"
NCU08054	CBNBSNCU00340_peak_2	22.6822	5.29843	662	beta-glucosidase 1
NCU02660	CBNBSNCU00340_peak_322	19.407	5.39545	663	DUF962 domain-containing protein
NCU01165	CBNBSNCU00340_peak_2377	22.6561	5.1632	664	LEM3/CDC50 family protein
NCU00336	CBNBSNCU00340_peak_1498	26.5659	6.30556	666	U3 small nucleolar RNA-associated protein 10
NCU07791	CBNBSNCU00340_peak_2130	33.3792	7.67545	666	hypothetical protein
NCU10011	CBNBSNCU00340_peak_2836	50.1322	9.38365	666	hypothetical protein
NCU02597	CBNBSNCU00340_peak_281	50.3235	9.26237	671	hypothetical protein
NCU10747	CBNBSNCU00340_peak_3173	12.9785	3.97174	671	hypothetical protein
NCU01236	CBNBSNCU00340_peak_2398	5.82251	3.02086	672	GIY-YIG catalytic domain-containing protein
NCU04323	CBNBSNCU00340_peak_2616	14.6475	4.50166	672	dihydroorotase
NCU09090	CBNBSNCU00340_peak_81	13.4415	4.24786	673	phosphopantothenate-cysteine ligase
NCU11291	CBNBSNCU00340_peak_1633	11.0933	3.98073	673	hypothetical protein
NCU03275	CBNBSNCU00340_peak_467	23.168	5.41403	675	hypothetical protein
NCU00500	CBNBSNCU00340_peak_732	31.2552	7.07506	675	hypothetical protein
NCU08123	CBNBSNCU00340_peak_3222	45.9644	11.6461	675	hypothetical protein
NCU07154	CBNBSNCU00340_peak_2668	25.3647	6.29281	676	yippee family protein
NCU07831	CBNBSNCU00340_peak_1280	34.6003	7.0837	677	eukaryotic translation initiation factor 3
NCU01867	CBNBSNCU00340_peak_205	45.225	8.43343	678	endoglucanase II
NCU01387	CBNBSNCU00340_peak_2453	17.6847	5.1657	678	hypothetical protein
NCU02412	CBNBSNCU00340_peak_3165	15.5714	4.1188	678	hypothetical protein
NCU08066	CBNBSNCU00340_peak_4	19.5137	4.9145	679	amino acid transporter
NCU08072	CBNBSNCU00340_peak_6	18.2677	5.33379	679	cell wall glucanase
NCU00473	CBNBSNCU00340_peak_1542	11.0933	3.9979	680	hypothetical protein
NCU16807	CBNBSNCU00340_peak_1886	34.9419	6.46536	680	hypothetical protein
NCU08904	CBNBSNCU00340_peak_2166	41.356	7.82712	681	20S-pre-rRNA D-site endonuclease NOB1
NCU04499	CBNBSNCU00340_peak_1883	22.1519	5.8349	682	hypothetical protein
NCU06109	CBNBSNCU00340_peak_3123	36.0143	7.50291	682	hypothetical protein
NCU00424	CBNBSNCU00340_peak_1527	17.4089	5.26297	683	Spo76 protein
NCU00490	CBNBSNCU00340_peak_1550	9.78174	3.60324	683	DUF803 domain membrane protein
NCU07514	CBNBSNCU00340_peak_1584	33.0564	7.60231	683	hypothetical protein
NCU06310	CBNBSNCU00340_peak_1869	20.1261	5.86164	683	exopolyphosphatase
NCU02514	CBNBSNCU00340_peak_244	25.3591	5.90392	684	"ATPase-1, atp-1"
NCU04492	CBNBSNCU00340_peak_1885	17.8026	4.90798	684	hypothetical protein
NCU16378	CBNBSNCU00340_peak_369	22.2949	5.6688	685	DUF1903 domain-containing protein
NCU01563	CBNBSNCU00340_peak_1117	15.8772	4.83809	685	RNA polymerase II holoenzyme cyclin-like subunit
NCU07832	CBNBSNCU00340_peak_1280	34.6003	7.0837	685	pre-mRNA processing splicing factor 8
NCU01045	CBNBSNCU00340_peak_2340	18.1479	4.44902	686	ribonuclease T1
NCU03146	CBNBSNCU00340_peak_427	44.0314	8.39347	687	F-box protein pof7
NCU00860	CBNBSNCU00340_peak_599	17.4089	4.71157	690	ZIP family zinc transporter
NCU07165	CBNBSNCU00340_peak_2665	17.7653	4.53358	690	mannose-6-phosphate isomerase
NCU10012	CBNBSNCU00340_peak_2836	50.1322	9.38365	690	hypothetical protein
NCU05679	CBNBSNCU00340_peak_1244	5.82195	2.70846	691	hypothetical protein
NCU08525	CBNBSNCU00340_peak_1614	13.8199	5.12113	693	hypothetical protein
NCU01120	CBNBSNCU00340_peak_2359	8.74951	3.80005	694	meiosis-specific topoisomerase Spo11
NCU00410	CBNBSNCU00340_peak_1523	18.5393	5.434	695	eukaryotic release factor 1
NCU07775	CBNBSNCU00340_peak_2143	6.53979	3.15194	696	hypothetical protein
NCU01081	CBNBSNCU00340_peak_2347	27.3467	6.44157	696	hypothetical protein
NCU01994	CBNBSNCU00340_peak_164	17.5552	5.18621	697	bZIP transcription factor
NCU05768	CBNBSNCU00340_peak_3251	12.5478	4.40424	698	mating response protein POI2
NCU03206	CBNBSNCU00340_peak_447	40.1282	8.60965	699	C2H2 finger domain-containing protein
NCU05528	CBNBSNCU00340_peak_2816	13.9511	4.60727	699	hypothetical protein
NCU08703	CBNBSNCU00340_peak_1163	49.0151	8.67801	700	inorganic pyrophosphatase
NCU09869	CBNBSNCU00340_peak_2840	46.2445	9.47014	700	exocyst complex component Sec3
NCU03556	CBNBSNCU00340_peak_883	16.2155	4.79226	701	peroxisomal membrane protein Pmp47
NCU07813	CBNBSNCU00340_peak_2121	16.9461	5.06962	704	hypothetical protein
NCU10603	CBNBSNCU00340_peak_579	8.64819	3.15456	705	hypothetical protein
NCU05597	CBNBSNCU00340_peak_2792	12.5478	4.32825	705	"ascus development-3, asd-3"
NCU06367	CBNBSNCU00340_peak_1849	35.7376	7.73154	707	Yip1 domain-containing protein
NCU06870	CBNBSNCU00340_peak_3033	9.88353	3.98458	707	serine palmitoyl CoA transferase subunit LcbA
NCU03811	CBNBSNCU00340_peak_2315	28.4774	6.53874	710	hypothetical protein
NCU06062	CBNBSNCU00340_peak_3142	36.3917	7.67194	710	aerobactin siderophore biosynthesis protein iucB
NCU04610	CBNBSNCU00340_peak_2220	20.1679	5.48885	712	oxysterol binding protein
NCU00249	CBNBSNCU00340_peak_1463	13.2849	4.48027	713	hypothetical protein
NCU07302	CBNBSNCU00340_peak_1995	11.4285	4.21698	714	hypothetical protein
NCU06894	CBNBSNCU00340_peak_3042	33.9709	8.01727	714	hypothetical protein
NCU09665	CBNBSNCU00340_peak_1640	19.2532	5.18273	715	hypothetical protein
NCU02595	CBNBSNCU00340_peak_280	24.6756	5.55453	716	hypothetical protein
NCU07827	CBNBSNCU00340_peak_1278	34.7634	7.78304	716	hypothetical protein
NCU01988	CBNBSNCU00340_peak_166	6.74569	3.31289	717	hypothetical protein
NCU04523	CBNBSNCU00340_peak_1878	11.4285	4.23626	717	hypothetical protein
NCU04403	CBNBSNCU00340_peak_1909	15.6009	5.02617	717	ubiquitin domain-containing protein
NCU09709	CBNBSNCU00340_peak_3088	6.08865	2.84317	720	T-complex protein 1 subunit zeta
NCU17258	CBNBSNCU00340_peak_3229	30.0789	6.89145	720	hypothetical protein
NCU01796	CBNBSNCU00340_peak_1058	30.1809	5.95022	721	hypothetical protein
NCU04192	CBNBSNCU00340_peak_2563	19.333	5.1863	722	vacuolar aspartyl aminopeptidase Lap4
NCU05200	CBNBSNCU00340_peak_2092	18.8109	4.51506	723	Pro-apoptotic serine protease nma-111
NCU01255	CBNBSNCU00340_peak_2407	18.1794	4.67309	723	mitochondrial dynamin GTPase
NCU07595	CBNBSNCU00340_peak_1650	16.6157	5.07054	724	hypothetical protein
NCU05488	CBNBSNCU00340_peak_2833	25.0653	5.7854	724	RNA-binding protein Vip1
NCU09213	CBNBSNCU00340_peak_529	23.0962	6.12398	725	hypothetical protein
NCU07501	CBNBSNCU00340_peak_30	21.4901	5.49181	726	hypothetical protein
NCU02606	CBNBSNCU00340_peak_285	10.8137	4.01323	726	hypothetical protein
NCU10069	CBNBSNCU00340_peak_387	56.7805	10.8786	726	hypothetical protein
NCU06782	CBNBSNCU00340_peak_1016	15.3233	4.51847	726	zinc metalloproteinase
NCU03368	CBNBSNCU00340_peak_951	31.7539	6.12193	727	hypothetical protein
NCU06163	CBNBSNCU00340_peak_3104	25.7381	5.22867	727	hypothetical protein
NCU08156	CBNBSNCU00340_peak_3234	11.5588	3.82178	727	hypothetical protein
NCU07587	CBNBSNCU00340_peak_1645	35.2476	8.0453	728	Swi6
NCU02190	CBNBSNCU00340_peak_3221	50.3107	9.02141	728	oxysterol binding protein
NCU02391	CBNBSNCU00340_peak_3170	37.0478	7.61688	729	protein transporter sec-24
NCU07353	CBNBSNCU00340_peak_551	48.3156	9.21194	731	UPF0499 protein
NCU03494	CBNBSNCU00340_peak_901	34.1167	6.78377	731	"partner for incompatibility with het-c, pin-c"
NCU07143	CBNBSNCU00340_peak_2674	27.029	6.62371	731	6-phosphogluconolactonase
NCU06471	CBNBSNCU00340_peak_1330	14.9467	4.03955	734	pyrroline-5-carboxylate reductase
NCU16318	CBNBSNCU00340_peak_80	19.8161	5.54871	735	hypothetical protein
NCU05101	CBNBSNCU00340_peak_2957	45.1557	8.9582	735	hypothetical protein
NCU07672	CBNBSNCU00340_peak_1818	31.99	6.82413	736	hypothetical protein
NCU01926	CBNBSNCU00340_peak_188	13.8927	4.5041	737	hypothetical protein
NCU04340	CBNBSNCU00340_peak_1925	35.2221	7.39573	738	acetyltransferase
NCU07301	CBNBSNCU00340_peak_1996	27.5147	6.37608	738	hypothetical protein
NCU03463	CBNBSNCU00340_peak_917	16.2044	4.21126	740	"vacuolar pH-sensitive ATPase-1, vph-1"
NCU03312	CBNBSNCU00340_peak_479	33.1829	7.31789	742	CorA family metal ion transporter
NCU09183	CBNBSNCU00340_peak_1233	10.4616	4.16959	743	kynureninase
NCU00441	CBNBSNCU00340_peak_1532	36.3816	6.64563	743	phosducin
NCU04128	CBNBSNCU00340_peak_2545	22.5543	4.73223	743	hypothetical protein
NCU10186	CBNBSNCU00340_peak_2800	11.0933	3.91204	743	hypothetical protein
NCU02087	CBNBSNCU00340_peak_133	22.7338	5.89073	744	hypothetical protein
NCU01416	CBNBSNCU00340_peak_2460	16.1677	4.64765	744	hypothetical protein
NCU04997	CBNBSNCU00340_peak_2982	49.4458	9.39321	744	xylanase
NCU08905	CBNBSNCU00340_peak_2166	41.356	7.82712	747	hypothetical protein
NCU07636	CBNBSNCU00340_peak_1672	39.1093	8.47838	748	hypothetical protein
NCU16329	CBNBSNCU00340_peak_105	25.0962	6.33141	750	hypothetical protein
NCU02540	CBNBSNCU00340_peak_255	14.4879	4.10156	750	meiotic expression up-regulated protein 14
NCU01358	CBNBSNCU00340_peak_2442	11.7923	4.32892	750	hypothetical protein
NCU01729	CBNBSNCU00340_peak_1078	9.52154	3.85083	751	hypothetical protein
NCU12068	CBNBSNCU00340_peak_2681	17.0913	4.89081	751	hypothetical protein
NCU03226	CBNBSNCU00340_peak_453	33.5444	7.11033	752	Y14 protein
NCU03110	CBNBSNCU00340_peak_415	12.1942	3.92115	753	hypothetical protein
NCU01185	CBNBSNCU00340_peak_2384	11.7236	4.16705	753	urease accessory protein UreF
NCU00310	CBNBSNCU00340_peak_1482	17.4567	5.51643	756	hypothetical protein
NCU01101	CBNBSNCU00340_peak_2353	21.3646	5.73951	756	"mitochondrial import 1, mim1"
NCU08342	CBNBSNCU00340_peak_511	48.0944	8.39267	757	COP9 signalosome complex subunit 7a
NCU02137	CBNBSNCU00340_peak_114	51.0256	9.60504	759	phosphatidylinositol:UDP-GlcNAc transferase PIG-C
NCU09483	CBNBSNCU00340_peak_1212	37.8685	7.62349	759	hypothetical protein
NCU01102	CBNBSNCU00340_peak_2354	13.4584	4.60197	759	mitochondrial export translocase Oxa1
NCU08685	CBNBSNCU00340_peak_1969	13.1229	4.61209	760	phosphoribosylformylglycinamidine synthase
NCU04598	CBNBSNCU00340_peak_2224	42.3651	8.01371	761	hypothetical protein
NCU08182	CBNBSNCU00340_peak_3242	41.8141	7.4746	761	hypothetical protein
NCU02109	CBNBSNCU00340_peak_122	10.782	3.40758	762	UDP-N-acetylglucosamine pyrophosphorylase
NCU02095	CBNBSNCU00340_peak_127	31.3499	6.79294	763	hypothetical protein
NCU07993	CBNBSNCU00340_peak_1942	24.4595	6.09509	763	leucine carboxyl methyltransferase 1
NCU06091	CBNBSNCU00340_peak_3131	28.3418	6.53965	763	vacuolar protein sorting-associated protein 74
NCU00565	CBNBSNCU00340_peak_703	17.1644	4.85873	764	lipoic acid synthetase
NCU00313	CBNBSNCU00340_peak_1484	21.4156	5.56784	764	hypothetical protein
NCU08151	CBNBSNCU00340_peak_3230	8.85946	4.07671	764	DNA kinase/phosphatase Pnk1
NCU00162	CBNBSNCU00340_peak_1440	6.83104	3.26584	765	hypothetical protein
NCU09720	CBNBSNCU00340_peak_3086	9.96789	4.11675	766	hypothetical protein
NCU06874	CBNBSNCU00340_peak_3035	34.183	7.10717	767	HMG box-containing protein
NCU09211	CBNBSNCU00340_peak_528	41.3436	8.06632	768	hypothetical protein
NCU00127	CBNBSNCU00340_peak_1431	14.7073	5.08057	768	hypothetical protein
NCU07825	CBNBSNCU00340_peak_1277	23.7446	6.10201	770	hypothetical protein
NCU01328	CBNBSNCU00340_peak_2433	17.6335	5.17011	770	transketolase
NCU10397	CBNBSNCU00340_peak_1307	22.8553	6.10792	771	phosphatidylinositol 4-kinase PIK1a
NCU05162	CBNBSNCU00340_peak_2097	11.3564	4.63855	773	hypothetical protein
NCU01519	CBNBSNCU00340_peak_1127	21.2668	5.30987	774	hypothetical protein
NCU00964	CBNBSNCU00340_peak_568	11.0933	3.98073	776	hypothetical protein
NCU00836	CBNBSNCU00340_peak_610	48.3156	9.19286	776	hypothetical protein
NCU04061	CBNBSNCU00340_peak_2897	5.62399	2.77351	776	hypothetical protein
NCU02382	CBNBSNCU00340_peak_3173	12.9785	3.97174	777	hypothetical protein
NCU01271	CBNBSNCU00340_peak_2415	27.4246	6.06415	779	"spermidine-1, spe-1"
NCU02829	CBNBSNCU00340_peak_808	12.1714	3.94666	780	phosphomannomutase
NCU02110	CBNBSNCU00340_peak_121	33.8775	5.87091	781	"NADPH oxidase-1, nox-1"
NCU16323	CBNBSNCU00340_peak_93	11.6453	4.14384	782	hypothetical protein
NCU05363	CBNBSNCU00340_peak_971	11.5876	4.24652	782	26S protease regulatory subunit 8
NCU08515	CBNBSNCU00340_peak_1141	15.1613	4.83454	782	vacuolar membrane ATPase-2
NCU08278	CBNBSNCU00340_peak_1838	10.3724	3.01285	782	mitochondrial carrier protein
NCU05932	CBNBSNCU00340_peak_2931	32.4794	7.73088	782	hypothetical protein
NCU00380	CBNBSNCU00340_peak_1512	19.5137	4.9145	785	hypothetical protein
NCU04853	CBNBSNCU00340_peak_1679	36.983	7.38066	786	hypothetical protein
NCU11307	CBNBSNCU00340_peak_3281	9.55138	3.97955	789	CCC1
NCU00220	CBNBSNCU00340_peak_1451	23.0169	5.6807	790	hypothetical protein
NCU02138	CBNBSNCU00340_peak_113	14.4032	4.76157	791	hypothetical protein
NCU16409	CBNBSNCU00340_peak_548	7.09234	3.40729	792	hypothetical protein
NCU09672	CBNBSNCU00340_peak_2183	16.926	4.93383	794	extracellular cell wall glucanase Crf1
NCU00648	CBNBSNCU00340_peak_667	10.8897	3.9429	797	choline transporter
NCU08313	CBNBSNCU00340_peak_1827	54.5413	10.4169	797	riboflavin biosynthesis protein Rib7
NCU09696	CBNBSNCU00340_peak_2175	15.073	4.58289	797	signal recognition particle protein
NCU08057	CBNBSNCU00340_peak_3	14.7844	4.74295	798	short chain dehydrogenase/reductase
NCU16741	CBNBSNCU00340_peak_1695	17.8026	4.94233	798	hypothetical protein
NCU09447	CBNBSNCU00340_peak_3005	53.9641	9.87361	799	"NAD(P)H dehydrogenase (external)-3, nde-3"
NCU02386	CBNBSNCU00340_peak_3171	9.79198	3.75127	800	hypothetical protein
NCU02749	CBNBSNCU00340_peak_347	15.2588	4.9224	801	hypothetical protein
NCU01802	CBNBSNCU00340_peak_1055	11.7198	4.08376	801	hypothetical protein
NCU04392	CBNBSNCU00340_peak_1912	16.7178	5.17957	801	hypothetical protein
NCU07494	CBNBSNCU00340_peak_34	7.3355	3.30827	802	hypothetical protein
NCU02661	CBNBSNCU00340_peak_322	19.407	5.39545	803	DNA-directed RNA polymerase II polypeptide
NCU00943	CBNBSNCU00340_peak_575	40.5167	7.83583	803	trehalase
NCU01076	CBNBSNCU00340_peak_2346	19.7457	5.59501	803	hypothetical protein
NCU09134	CBNBSNCU00340_peak_494	16.7243	4.63352	804	hypothetical protein
NCU16762	CBNBSNCU00340_peak_1747	15.3178	4.73502	805	hypothetical protein
NCU05256	CBNBSNCU00340_peak_2077	11.2982	4.09718	805	hypothetical protein
NCU09052	CBNBSNCU00340_peak_3020	36.798	7.67451	805	hypothetical protein
NCU00300	CBNBSNCU00340_peak_1478	31.7539	6.10762	806	PQ loop repeat protein
NCU16947	CBNBSNCU00340_peak_2188	36.6187	8.46339	806	hypothetical protein
NCU05490	CBNBSNCU00340_peak_2832	47.6272	9.10497	806	hypothetical protein
NCU05764	CBNBSNCU00340_peak_3248	13.5041	4.71718	806	hypothetical protein
NCU01881	CBNBSNCU00340_peak_201	14.7181	4.33692	807	hypothetical protein
NCU04584	CBNBSNCU00340_peak_2227	13.7482	4.6772	808	hypothetical protein
NCU09619	CBNBSNCU00340_peak_875	13.4713	4.38528	809	hypothetical protein
NCU02996	CBNBSNCU00340_peak_760	22.2893	5.98427	810	endopolyphosphatase
NCU07888	CBNBSNCU00340_peak_1305	13.3687	4.67481	811	hypothetical protein
NCU04154	CBNBSNCU00340_peak_2554	40.4662	8.16426	812	hypothetical protein
NCU09301	CBNBSNCU00340_peak_2986	40.0345	7.42402	812	UDP-glucose:sterol glycosyltransferase
NCU05550	CBNBSNCU00340_peak_2812	16.0927	4.93817	813	hypothetical protein
NCU04522	CBNBSNCU00340_peak_1878	11.4285	4.23626	814	hypothetical protein
NCU04018	CBNBSNCU00340_peak_2880	13.9745	4.47957	814	hypothetical protein
NCU04475	CBNBSNCU00340_peak_1889	19.5116	3.78477	815	lipase B
NCU09288	CBNBSNCU00340_peak_2992	23.6383	5.63256	815	hypothetical protein
NCU07451	CBNBSNCU00340_peak_59	35.0485	6.80335	817	methionyl-tRNA synthetase
NCU01324	CBNBSNCU00340_peak_2432	11.2418	3.74018	817	hypothetical protein
NCU06055	CBNBSNCU00340_peak_3146	33.8649	7.36125	817	extracellular alkaline protease
NCU03210	CBNBSNCU00340_peak_449	28.6296	5.82143	818	hypothetical protein
NCU16457	CBNBSNCU00340_peak_724	14.3288	3.99992	818	hypothetical protein
NCU10404	CBNBSNCU00340_peak_1101	31.0405	5.80952	818	hypothetical protein
NCU00677	CBNBSNCU00340_peak_658	12.0007	4.43387	821	phenylacetyl-CoA ligase
NCU09364	CBNBSNCU00340_peak_358	38.7246	7.55238	822	"hsp30-like protein, hsp30"
NCU06165	CBNBSNCU00340_peak_3102	15.2588	4.9224	822	hypothetical protein
NCU05358	CBNBSNCU00340_peak_970	13.4261	4.11838	824	hypothetical protein
NCU03759	CBNBSNCU00340_peak_2298	8.41275	3.56241	824	methionine-tRNA synthetase
NCU02212	CBNBSNCU00340_peak_3214	13.7244	4.35876	824	hypothetical protein
NCU05557	CBNBSNCU00340_peak_2808	30.9639	6.079	825	hypothetical protein
NCU05668	CBNBSNCU00340_peak_1241	17.9477	5.53527	826	hypothetical protein
NCU06506	CBNBSNCU00340_peak_1348	11.2036	4.27913	826	hypothetical protein
NCU00295	CBNBSNCU00340_peak_1476	47.6272	8.88418	826	hypothetical protein
NCU00439	CBNBSNCU00340_peak_1530	18.8348	5.08995	826	hypothetical protein
NCU05934	CBNBSNCU00340_peak_2928	10.0158	3.98421	826	hypothetical protein
NCU06024	CBNBSNCU00340_peak_3154	29.3482	6.28859	826	"quinate-4, qa-4"
NCU06254	CBNBSNCU00340_peak_1381	30.4787	7.27691	828	tRNA splicing 2' phosphotransferase 1
NCU07609	CBNBSNCU00340_peak_1658	29.3606	7.42715	828	MFS transporter
NCU07281	CBNBSNCU00340_peak_2001	9.17438	3.27344	830	"glucose-6-phosphate isomerase, gpi-1"
NCU01087	CBNBSNCU00340_peak_2349	13.446	3.37535	831	hypothetical protein
NCU00807	CBNBSNCU00340_peak_620	23.7201	6.10936	833	hypothetical protein
NCU04826	CBNBSNCU00340_peak_2753	18.1479	4.4226	833	hypothetical protein
NCU08688	CBNBSNCU00340_peak_1967	15.0052	4.5989	834	hypothetical protein
NCU09535	CBNBSNCU00340_peak_2510	24.4311	5.76492	834	hypothetical protein
NCU07432	CBNBSNCU00340_peak_64	40.684	7.06636	836	tetraspanin
NCU03818	CBNBSNCU00340_peak_2317	13.0928	4.44249	836	phospholipid-translocating P-type ATPase
NCU05096	CBNBSNCU00340_peak_2959	39.5981	7.6554	837	hypothetical protein
NCU03480	CBNBSNCU00340_peak_905	10.8689	4.46679	840	hypothetical protein
NCU08292	CBNBSNCU00340_peak_1834	14.456	4.99891	840	hypothetical protein
NCU08314	CBNBSNCU00340_peak_1827	54.5413	10.4169	841	hypothetical protein
NCU08015	CBNBSNCU00340_peak_1948	20.2986	5.20761	841	hypothetical protein
NCU00493	CBNBSNCU00340_peak_1551	15.7684	4.27316	843	coatomer subunit delta
NCU08497	CBNBSNCU00340_peak_1147	20.5263	4.52372	847	hypothetical protein
NCU05191	CBNBSNCU00340_peak_2093	36.2217	6.73387	847	hypothetical protein
NCU03815	CBNBSNCU00340_peak_2316	11.9445	4.23224	849	large neutral amino acids transporter small subunit 2
NCU07415	CBNBSNCU00340_peak_537	6.49985	3.27828	851	proline iminopeptidase
NCU16452	CBNBSNCU00340_peak_706	14.4981	4.16153	851	hypothetical protein
NCU07155	CBNBSNCU00340_peak_2668	25.3647	6.29281	851	ornithine decarboxylase antizyme
NCU03819	CBNBSNCU00340_peak_2317	13.0928	4.44249	853	COPII coat assembly protein sec-16
NCU01389	CBNBSNCU00340_peak_2454	15.0266	4.68558	853	mitogen-activated protein kinase organizer 1
NCU04498	CBNBSNCU00340_peak_1883	22.1519	5.8349	854	hypothetical protein
NCU07103	CBNBSNCU00340_peak_2684	39.5981	7.67258	855	hypothetical protein
NCU16651	CBNBSNCU00340_peak_1415	20.9546	5.16427	856	dihydrofolate reductase
NCU16925	CBNBSNCU00340_peak_2159	8.6961	3.92653	856	hypothetical protein
NCU07590	CBNBSNCU00340_peak_1646	8.31556	3.81685	860	Ser/Thr protein phosphatase
NCU16918	CBNBSNCU00340_peak_2142	11.9345	3.91868	861	hypothetical protein
NCU01305	CBNBSNCU00340_peak_2428	44.2676	8.01544	862	rhomboid family membrane protein
NCU17278	CBNBSNCU00340_peak_3269	10.2942	4.01257	862	TOL
NCU05688	CBNBSNCU00340_peak_1251	21.5313	4.83207	863	hypothetical protein
NCU03754	CBNBSNCU00340_peak_2293	11.7198	4.03224	863	hypothetical protein
NCU01561	CBNBSNCU00340_peak_1118	28.0378	4.95634	864	hypothetical protein
NCU07780	CBNBSNCU00340_peak_2137	13.8595	4.04436	864	hypothetical protein
NCU03798	CBNBSNCU00340_peak_2308	31.441	7.0873	864	mitochondrial import inner membrane translocase subunit tim-22
NCU07326	CBNBSNCU00340_peak_1984	20.5195	4.84839	865	hypothetical protein
NCU02636	CBNBSNCU00340_peak_308	14.0837	4.62766	866	ubiquitin conjugating enzyme
NCU00527	CBNBSNCU00340_peak_721	10.784	4.43692	866	mitochondrial genome maintenance protein Mgr2
NCU03803	CBNBSNCU00340_peak_2310	13.8927	4.54045	866	sorbitol utilization protein SOU2
NCU07102	CBNBSNCU00340_peak_2688	19.9312	5.95451	868	hypothetical protein
NCU09440	CBNBSNCU00340_peak_3004	11.0933	3.91204	868	hypothetical protein
NCU05752	CBNBSNCU00340_peak_3246	22.7259	6.09118	868	"indoleamine 2,3-dioxygenase"
NCU07434	CBNBSNCU00340_peak_63	48.5218	8.90235	870	short-chain dehydrogenase/reductase SDR
NCU04223	CBNBSNCU00340_peak_2576	8.61649	3.79479	871	hypothetical protein
NCU05928	CBNBSNCU00340_peak_2932	30.7283	7.4443	871	hypothetical protein
NCU01962	CBNBSNCU00340_peak_174	12.9167	3.30858	872	hypothetical protein
NCU08372	CBNBSNCU00340_peak_502	12.4559	4.19715	872	triacylglycerol lipase
NCU08923	CBNBSNCU00340_peak_2622	29.7708	7.77961	873	zinc knuckle domain-containing protein
NCU05231	CBNBSNCU00340_peak_2084	21.8879	5.79884	875	ER membrane DUF1077 domain-containing protein
NCU07081	CBNBSNCU00340_peak_2690	37.5554	7.0219	875	lipase
NCU04754	CBNBSNCU00340_peak_2727	19.3341	5.7355	876	branched-chain-amino-acid aminotransferase
NCU08193	CBNBSNCU00340_peak_1589	24.5532	6.12109	877	hypothetical protein
NCU07622	CBNBSNCU00340_peak_1669	27.7728	5.9604	878	hypothetical protein
NCU07331	CBNBSNCU00340_peak_1982	19.6785	5.47164	878	U3 small nucleolar ribonucleoprotein Lcp5
NCU08013	CBNBSNCU00340_peak_1946	9.17011	3.72464	880	hypothetical protein
NCU07162	CBNBSNCU00340_peak_2667	50.806	9.46895	880	hypothetical protein
NCU00973	CBNBSNCU00340_peak_564	23.0962	6.08406	881	hypothetical protein
NCU06114	CBNBSNCU00340_peak_3122	26.3272	5.56016	881	hypothetical protein
NCU00969	CBNBSNCU00340_peak_566	7.70577	3.70952	883	NADH:ubiquinone oxidoreductase 17.8kD subunit
NCU00675	CBNBSNCU00340_peak_659	51.0256	9.53629	885	efr-3
NCU04066	CBNBSNCU00340_peak_2898	32.5827	5.9284	885	hypothetical protein
NCU05000	CBNBSNCU00340_peak_2981	24.5532	6.21649	885	hypothetical protein
NCU04118	CBNBSNCU00340_peak_2542	10.1663	4.225	887	aspartokinase
NCU08090	CBNBSNCU00340_peak_14	8.74951	3.82007	888	hypothetical protein
NCU04570	CBNBSNCU00340_peak_2232	18.9278	4.56473	888	NIMA interactive protein
NCU01123	CBNBSNCU00340_peak_2361	49.8934	10.1101	889	hypothetical protein
NCU09274	CBNBSNCU00340_peak_2996	13.6609	4.39284	891	hypothetical protein
NCU05753	CBNBSNCU00340_peak_3246	22.7259	6.09118	891	ESCRT-I component
NCU00739	CBNBSNCU00340_peak_642	6.98521	3.47975	892	hypothetical protein
NCU03345	CBNBSNCU00340_peak_961	8.10601	3.30664	892	hypothetical protein
NCU00847	CBNBSNCU00340_peak_605	40.67	8.35522	893	hypothetical protein
NCU00747	CBNBSNCU00340_peak_640	11.3116	3.34068	894	hypothetical protein
NCU01494	CBNBSNCU00340_peak_1134	15.378	4.38375	895	MFS sugar transporter
NCU08086	CBNBSNCU00340_peak_9	31.549	7.30158	896	hypothetical protein
NCU00469	CBNBSNCU00340_peak_1539	16.204	3.62339	898	alpha-tubulin suppressor protein Aats1
NCU05254	CBNBSNCU00340_peak_2079	38.1929	6.43311	898	ribose-phosphate pyrophosphokinase
NCU01444	CBNBSNCU00340_peak_2525	10.1663	4.16093	898	rheb small monomeric GTPase RhbA
NCU07761	CBNBSNCU00340_peak_2145	16.0927	4.97633	899	hypothetical protein
NCU07480	CBNBSNCU00340_peak_49	10.4468	4.11895	901	hypothetical protein
NCU05159	CBNBSNCU00340_peak_2941	10.8897	4.26759	904	acetylxylan esterase
NCU09703	CBNBSNCU00340_peak_3090	13.0657	4.30704	904	acetolactate decarboxylase
NCU08403	CBNBSNCU00340_peak_1182	14.6698	4.76646	906	hypothetical protein
NCU08852	CBNBSNCU00340_peak_2112	23.2866	5.89983	906	polymerase 2 ADP-ribosyltransferase 2
NCU05618	CBNBSNCU00340_peak_2786	37.4042	7.87639	906	extracellular SCP domain-containing protein Pry1
NCU00296	CBNBSNCU00340_peak_1477	33.4023	6.63164	907	hypothetical protein
NCU08836	CBNBSNCU00340_peak_2042	30.1809	5.95022	907	hypothetical protein
NCU07070	CBNBSNCU00340_peak_2694	11.7198	4.06659	907	ATP-dependent RNA helicase dbp-9
NCU01634	CBNBSNCU00340_peak_1100	39.1364	7.45977	908	"histone H4-1, hH4-1"
NCU05624	CBNBSNCU00340_peak_2781	6.17705	2.82434	908	L-asparaginase
NCU09581	CBNBSNCU00340_peak_3057	15.5437	4.85293	909	hypothetical protein
NCU07581	CBNBSNCU00340_peak_1641	7.95511	3.90779	912	hypothetical protein
NCU00710	CBNBSNCU00340_peak_652	17.9103	4.25388	913	acetyl xylan esterase
NCU08615	CBNBSNCU00340_peak_859	11.8179	3.97132	913	tyrosinase
NCU08713	CBNBSNCU00340_peak_1168	11.0933	3.98073	913	hypothetical protein
NCU01997	CBNBSNCU00340_peak_162	24.9663	6.29471	914	ABC transporter
NCU01511	CBNBSNCU00340_peak_1131	26.1543	6.02412	916	urease accessory protein ureG
NCU12152	CBNBSNCU00340_peak_2980	3.33147	2.41685	917	hypothetical protein
NCU08254	CBNBSNCU00340_peak_1602	28.7253	7.25379	918	hypothetical protein
NCU03974	CBNBSNCU00340_peak_2869	30.2748	5.71706	918	hypothetical protein
NCU00472	CBNBSNCU00340_peak_1541	10.2201	3.42352	919	CDC37
NCU04884	CBNBSNCU00340_peak_1690	29.024	7.49098	920	alpha/beta hydrolase fold protein
NCU07193	CBNBSNCU00340_peak_2663	42.6208	7.68012	922	hypothetical protein
NCU06570	CBNBSNCU00340_peak_1754	46.4575	9.11481	925	hypothetical protein
NCU02540	CBNBSNCU00340_peak_255	14.4879	4.10156	926	meiotic expression up-regulated protein 14
NCU02577	CBNBSNCU00340_peak_269	19.818	4.77684	926	hypothetical protein
NCU06616	CBNBSNCU00340_peak_1770	9.07008	3.64208	927	S-adenosylmethionine-dependent methyltransferase
NCU02216	CBNBSNCU00340_peak_3212	26.9566	6.19584	927	cell wall glycosyl hydrolase Dfg5
NCU01340	CBNBSNCU00340_peak_2437	20.5195	4.83408	928	hypothetical protein
NCU02629	CBNBSNCU00340_peak_304	25.5922	6.33681	931	bifunctional purine biosynthesis protein
NCU02381	CBNBSNCU00340_peak_3174	11.2133	4.21531	934	phosphatidylserine synthase
NCU09831	CBNBSNCU00340_peak_2159	8.6961	3.92653	936	hypothetical protein
NCU03708	CBNBSNCU00340_peak_2283	16.2116	4.5772	936	hypothetical protein
NCU08367	CBNBSNCU00340_peak_504	31.7207	6.66936	939	hypothetical protein
NCU12069	CBNBSNCU00340_peak_2682	20.7371	5.38878	939	hypothetical protein
NCU01432	CBNBSNCU00340_peak_2529	30.216	6.55644	940	hypothetical protein
NCU01156	CBNBSNCU00340_peak_2371	42.1179	8.5822	942	hypothetical protein
NCU01247	CBNBSNCU00340_peak_2406	27.0174	6.33468	942	hypothetical protein
NCU02991	CBNBSNCU00340_peak_762	6.50027	3.13933	943	hypothetical protein
NCU02213	CBNBSNCU00340_peak_3213	13.722	4.45581	943	hypothetical protein
NCU00659	CBNBSNCU00340_peak_664	31.425	6.98179	944	hypothetical protein
NCU09691	CBNBSNCU00340_peak_2176	45.8969	8.35852	944	hypothetical protein
NCU03736	CBNBSNCU00340_peak_2287	35.8774	6.88141	945	hypothetical protein
NCU01762	CBNBSNCU00340_peak_1074	12.3007	4.33065	947	nucleolar RNAse III
NCU07589	CBNBSNCU00340_peak_1646	8.31556	3.81685	947	acetyltransferase
NCU01505	CBNBSNCU00340_peak_1132	24.5532	6.12109	948	hypothetical protein
NCU02568	CBNBSNCU00340_peak_266	45.9132	8.59851	949	hypothetical protein
NCU04443	CBNBSNCU00340_peak_1897	36.4998	6.35108	950	quinone oxidoreductase
NCU07818	CBNBSNCU00340_peak_1274	11.8555	3.4437	951	hypothetical protein
NCU06964	CBNBSNCU00340_peak_2009	31.8086	5.90198	952	taurine catabolism dioxygenase TauD
NCU07324	CBNBSNCU00340_peak_1985	17.5075	5.00375	953	"conidiation-13, con-13"
NCU05395	CBNBSNCU00340_peak_975	33.2894	6.67173	954	hypothetical protein
NCU10683	CBNBSNCU00340_peak_3148	34.8862	7.40907	959	NRS/ER
NCU02909	CBNBSNCU00340_peak_786	18.2047	5.66701	960	chitosanase
NCU03602	CBNBSNCU00340_peak_2244	12.3007	4.33065	960	hypothetical protein
NCU07076	CBNBSNCU00340_peak_2692	21.6059	6.07582	960	"endo-1,3-beta-glucanase"
NCU05010	CBNBSNCU00340_peak_2977	39.1055	8.17357	960	hypothetical protein
NCU12150	CBNBSNCU00340_peak_2980	3.33147	2.41685	960	ywbE protein
NCU09135	CBNBSNCU00340_peak_494	16.7243	4.63352	961	phosphatidylinositol phospholipase C
NCU05102	CBNBSNCU00340_peak_2955	34.224	6.7253	962	hypothetical protein
NCU08087	CBNBSNCU00340_peak_11	13.2192	4.41323	964	hypothetical protein
NCU02068	CBNBSNCU00340_peak_140	13.7199	3.86783	965	hypothetical protein
NCU07975	CBNBSNCU00340_peak_1929	10.8651	3.64639	965	DNA repair and recombination protein RAD5B
NCU09136	CBNBSNCU00340_peak_495	37.52	6.63422	966	hypothetical protein
NCU01564	CBNBSNCU00340_peak_1117	15.8772	4.83809	966	calcium dependent mitochondrial carrier protein
NCU09576	CBNBSNCU00340_peak_3060	12.0382	3.76087	967	hypothetical protein
NCU03001	CBNBSNCU00340_peak_758	46.1044	9.25351	968	hypothetical protein
NCU09014	CBNBSNCU00340_peak_1565	38.7246	7.55238	968	cleavage and polyadenylation specificity factor subunit 5
NCU04133	CBNBSNCU00340_peak_2547	6.579	2.94523	969	peptidase family M28
NCU05652	CBNBSNCU00340_peak_2775	11.5489	4.29253	970	hypothetical protein
NCU03024	CBNBSNCU00340_peak_750	34.3146	8.05682	971	GARP complex subunit Vps53
NCU12104	CBNBSNCU00340_peak_2829	30.1651	5.91765	971	hypothetical protein
NCU02847	CBNBSNCU00340_peak_801	8.13016	3.49993	975	hypothetical protein
NCU07095	CBNBSNCU00340_peak_2689	23.0169	5.69787	976	hypothetical protein
NCU07030	CBNBSNCU00340_peak_2038	16.2823	4.29042	977	hypothetical protein
NCU10245	CBNBSNCU00340_peak_1185	27.5991	6.64424	978	hypothetical protein
NCU06618	CBNBSNCU00340_peak_1771	26.8274	6.56562	978	metallopeptidase MepB
NCU02281	CBNBSNCU00340_peak_3201	12.5499	4.41431	978	hypothetical protein
NCU02673	CBNBSNCU00340_peak_327	39.6445	7.99927	979	hypothetical protein
NCU07774	CBNBSNCU00340_peak_2143	6.53979	3.15194	979	"GTP cyclohydrolase-1, gch-1"
NCU04182	CBNBSNCU00340_peak_2561	37.8524	7.415	979	splicing factor 3b subunit 4
NCU09595	CBNBSNCU00340_peak_878	18.6543	5.28337	980	serine/threonine protein kinase
NCU03469	CBNBSNCU00340_peak_910	22.6127	6.23858	982	hypothetical protein
NCU01699	CBNBSNCU00340_peak_1087	36.5104	6.13047	982	hypothetical protein
NCU07127	CBNBSNCU00340_peak_2677	13.9745	4.44455	983	dienelactone hydrolase
NCU09843	CBNBSNCU00340_peak_2634	8.72284	3.04304	984	WD repeat containing protein 57
NCU03928	CBNBSNCU00340_peak_2859	11.2906	4.15592	985	hypothetical protein
NCU05049	CBNBSNCU00340_peak_2967	19.7715	5.75344	985	hypothetical protein
NCU04291	CBNBSNCU00340_peak_2606	52.5682	10.1381	986	hypothetical protein
NCU09829	CBNBSNCU00340_peak_2158	36.3159	7.93493	987	hypothetical protein
NCU07740	CBNBSNCU00340_peak_2153	42.767	7.92596	989	hypothetical protein
NCU12156	CBNBSNCU00340_peak_2983	26.0473	5.79139	989	Na(+)/H(+) antiporter 1
NCU11424	CBNBSNCU00340_peak_2984	14.6928	3.79858	989	"carotenoid oxygenase-2, cao-2"
NCU02491	CBNBSNCU00340_peak_234	30.7864	6.94662	991	DNAJ domain-containing protein
NCU06346	CBNBSNCU00340_peak_1855	12.4534	3.62836	991	hypothetical protein
NCU06476	CBNBSNCU00340_peak_1333	32.1421	6.68674	993	hypothetical protein
NCU09873	CBNBSNCU00340_peak_2839	30.5883	7.49906	994	phosphoenolpyruvate carboxykinase
NCU05816	CBNBSNCU00340_peak_3266	11.6003	3.94599	996	hypothetical protein
NCU06491	CBNBSNCU00340_peak_1341	11.3741	4.08292	998	SWR1-complex protein 5
NCU10427	CBNBSNCU00340_peak_1629	22.7664	5.52304	999	hypothetical protein
NCU03401	CBNBSNCU00340_peak_942	18.7955	4.1085	1000	hypothetical protein
NCU01831	CBNBSNCU00340_peak_1041	38.084	7.35908	1001	RNA polymerase TFIIH complex subunit Ssl1
NCU04933	CBNBSNCU00340_peak_1708	25.9466	5.97157	1001	nucleoside-diphosphate-sugar epimerase
NCU06730	CBNBSNCU00340_peak_2504	8.78491	2.99237	1001	hypothetical protein
NCU02430	CBNBSNCU00340_peak_3161	15.1803	4.67866	1002	cystathionine gamma-synthase
NCU07491	CBNBSNCU00340_peak_36	13.7332	4.70723	1005	hypothetical protein
NCU02939	CBNBSNCU00340_peak_772	17.6847	5.1657	1007	hypothetical protein
NCU01715	CBNBSNCU00340_peak_1083	20.5861	5.64411	1007	hypothetical protein
NCU04180	CBNBSNCU00340_peak_2561	37.8524	7.415	1008	mitochondrial folate carrier protein Flx1
NCU03084	CBNBSNCU00340_peak_406	36.5604	6.63707	1009	inosine-uridine preferring nucleoside hydrolase
NCU02157	CBNBSNCU00340_peak_104	11.5588	3.88422	1011	COQ4
NCU01610	CBNBSNCU00340_peak_1107	24.6756	5.57014	1012	hypothetical protein
NCU01007	CBNBSNCU00340_peak_2330	28.1797	6.57234	1012	hypothetical protein
NCU08443	CBNBSNCU00340_peak_1189	27.05	6.51194	1013	hypothetical protein
NCU04268	CBNBSNCU00340_peak_2594	19.2048	4.4256	1013	hypothetical protein
NCU09015	CBNBSNCU00340_peak_1565	38.7246	7.55238	1015	hypothetical protein
NCU06343	CBNBSNCU00340_peak_1856	27.3467	6.5163	1015	hypothetical protein
NCU09548	CBNBSNCU00340_peak_2514	35.2631	7.15743	1015	platelet-activating factor acetylhydrolase
NCU03172	CBNBSNCU00340_peak_435	12.3568	4.16962	1016	hypothetical protein
NCU00101	CBNBSNCU00340_peak_1423	11.1936	4.08869	1018	pbn-1
NCU16848	CBNBSNCU00340_peak_1987	6.50027	3.17368	1018	hypothetical protein
NCU09317	CBNBSNCU00340_peak_381	31.8086	5.90198	1019	hypothetical protein
NCU16444	CBNBSNCU00340_peak_658	12.0007	4.43387	1019	hypothetical protein
NCU07148	CBNBSNCU00340_peak_2671	35.4131	7.79353	1019	hypothetical protein
NCU03078	CBNBSNCU00340_peak_401	32.3045	5.36416	1022	hypothetical protein
NCU10828	CBNBSNCU00340_peak_1070	14.0684	4.71497	1022	hypothetical protein
NCU06073	CBNBSNCU00340_peak_3137	16.6157	5.07054	1024	hypothetical protein
NCU16442	CBNBSNCU00340_peak_646	28.1636	6.6643	1025	hypothetical protein
NCU08832	CBNBSNCU00340_peak_2044	19.2532	5.1999	1025	hypothetical protein
NCU10519	CBNBSNCU00340_peak_2726	12.8725	3.56208	1025	G-patch domain-containing protein
NCU02596	CBNBSNCU00340_peak_280	24.6756	5.55453	1026	hypothetical protein
NCU16645	CBNBSNCU00340_peak_1365	13.1918	4.14276	1026	hypothetical protein
NCU04818	CBNBSNCU00340_peak_2752	15.6009	5.02617	1026	cation diffusion facilitator 1
NCU08130	CBNBSNCU00340_peak_3224	26.9901	5.88235	1027	hypothetical protein
NCU00894	CBNBSNCU00340_peak_594	29.5413	6.80795	1028	hypothetical protein
NCU05683	CBNBSNCU00340_peak_1249	12.3568	4.16962	1028	dihydroxy-acid dehydratase
NCU07483	CBNBSNCU00340_peak_46	13.235	4.63321	1030	"frost, fr"
NCU00364	CBNBSNCU00340_peak_1509	32.8331	6.85861	1030	hypothetical protein
NCU06340	CBNBSNCU00340_peak_1859	30.3951	6.97966	1030	TPR repeat protein
NCU04819	CBNBSNCU00340_peak_2752	15.6009	5.02617	1030	Fe(2+) transporter 3
NCU03083	CBNBSNCU00340_peak_406	36.5604	6.63707	1032	hypothetical protein
NCU06362	CBNBSNCU00340_peak_1851	11.9428	4.20653	1032	GTPase activating protein
NCU02026	CBNBSNCU00340_peak_151	32.9686	6.37539	1033	hypothetical protein
NCU07082	CBNBSNCU00340_peak_2690	37.5554	7.0219	1034	aspartyl-tRNA synthetase
NCU10066	CBNBSNCU00340_peak_3183	9.4692	3.81597	1034	coatomer alpha subunit
NCU00609	CBNBSNCU00340_peak_689	40.9562	7.41216	1037	"initiation-specific alpha-1,6-mannosyltransferase"
NCU09393	CBNBSNCU00340_peak_3078	8.8065	4.0332	1037	hypothetical protein
NCU02002	CBNBSNCU00340_peak_158	14.0239	3.92221	1038	hypothetical protein
NCU03200	CBNBSNCU00340_peak_446	10.782	3.38305	1039	serine/threonine-protein kinase sck1
NCU09108	CBNBSNCU00340_peak_486	10.0343	3.91346	1039	hypothetical protein
NCU16638	CBNBSNCU00340_peak_1344	13.5143	4.44297	1040	DSBA family oxidoreductase
NCU01323	CBNBSNCU00340_peak_2432	11.2418	3.74018	1040	cohesin complex subunit
NCU00470	CBNBSNCU00340_peak_1540	39.4792	8.02944	1042	DNA repair protein Rad9
NCU07610	CBNBSNCU00340_peak_1658	29.3606	7.42715	1044	taurine dioxygenase
NCU09452	CBNBSNCU00340_peak_3008	22.9031	5.67702	1045	hypothetical protein
NCU09040	CBNBSNCU00340_peak_3017	29.4015	5.90729	1045	oxidoreductase
NCU02196	CBNBSNCU00340_peak_3217	13.829	4.81423	1045	taurine catabolism dioxygenase TauD
NCU00241	CBNBSNCU00340_peak_1459	15.0266	4.74162	1046	hypothetical protein
NCU02281	CBNBSNCU00340_peak_3201	12.5499	4.41431	1046	hypothetical protein
NCU02542	CBNBSNCU00340_peak_256	7.12094	3.29533	1047	hexokinase
NCU05313	CBNBSNCU00340_peak_2064	28.5456	6.57493	1047	mitochondria fission 1 protein
NCU09792	CBNBSNCU00340_peak_2771	48.422	8.66852	1047	UDP-galactose transporter Gms1
NCU01542	CBNBSNCU00340_peak_1123	20.8428	5.73662	1048	hypothetical protein
NCU07509	CBNBSNCU00340_peak_26	14.2347	4.30963	1049	geranylgeranyltransferase beta subunit
NCU06837	CBNBSNCU00340_peak_1003	24.8882	6.0182	1050	hypothetical protein
NCU00674	CBNBSNCU00340_peak_660	10.2546	3.41874	1052	hypothetical protein
NCU08477	CBNBSNCU00340_peak_1152	35.7355	6.02008	1053	small GTP-binding protein
NCU16750	CBNBSNCU00340_peak_1716	10.2925	3.56054	1053	hypothetical protein
NCU06141	CBNBSNCU00340_peak_3110	9.78174	3.57201	1053	protoheme IX farnesyltransferase
NCU07633	CBNBSNCU00340_peak_1671	30.5559	7.21694	1054	hypothetical protein
NCU03223	CBNBSNCU00340_peak_451	7.58603	3.08832	1055	"sn-1,2-diacylglycerol cholinephosphotransferase"
NCU03478	CBNBSNCU00340_peak_906	9.81328	4.1073	1056	hypothetical protein
NCU09184	CBNBSNCU00340_peak_1233	10.4616	4.16959	1058	"indoleamine 2,3-dioxygenase"
NCU08978	CBNBSNCU00340_peak_1555	12.6393	3.84673	1058	hypothetical protein
NCU06768	CBNBSNCU00340_peak_1021	16.9327	4.37271	1060	60S ribosomal protein L16
NCU04205	CBNBSNCU00340_peak_2568	36.798	7.69319	1061	acid proteinase
NCU03176	CBNBSNCU00340_peak_438	15.1347	4.19015	1062	hypothetical protein
NCU00522	CBNBSNCU00340_peak_724	14.3288	3.99992	1063	cystathionine beta-lyase
NCU10028	CBNBSNCU00340_peak_872	11.7157	4.46698	1064	bax Inhibitor family protein
NCU06787	CBNBSNCU00340_peak_1014	7.62421	3.07531	1064	hypothetical protein
NCU03823	CBNBSNCU00340_peak_2318	20.8203	5.3587	1064	ABC1 protein
NCU03696	CBNBSNCU00340_peak_2277	13.25	3.94689	1065	nitroreductase
NCU07207	CBNBSNCU00340_peak_2660	28.8381	7.19369	1065	hypothetical protein
NCU08468	CBNBSNCU00340_peak_1153	12.7941	4.04032	1066	actin-interacting protein
NCU01591	CBNBSNCU00340_peak_1110	10.9996	3.95652	1068	hypothetical protein
NCU11381	CBNBSNCU00340_peak_3227	41.5672	7.82971	1069	diphosphomevalonate decarboxylase
NCU09157	CBNBSNCU00340_peak_1225	21.4901	5.49181	1070	hypothetical protein
NCU04042	CBNBSNCU00340_peak_2886	25.2634	6.03092	1070	hypothetical protein
NCU10304	CBNBSNCU00340_peak_3186	9.78174	3.5564	1070	hypothetical protein
NCU05314	CBNBSNCU00340_peak_2063	31.7539	6.15055	1071	hypothetical protein
NCU07104	CBNBSNCU00340_peak_2683	13.6609	4.37567	1071	hypothetical protein
NCU07616	CBNBSNCU00340_peak_1661	23.2857	6.159	1072	hypothetical protein
NCU00122	CBNBSNCU00340_peak_1430	14.3288	4.42719	1073	aspartyl aminopeptidase
NCU02677	CBNBSNCU00340_peak_328	12.7992	4.46106	1074	"arginine-3, arg-3"
NCU07037	CBNBSNCU00340_peak_2039	36.568	8.06842	1075	hypothetical protein
NCU02500	CBNBSNCU00340_peak_237	15.071	4.88299	1076	"clock-controlled pheromone CCG-4, ccg-4"
NCU04090	CBNBSNCU00340_peak_2901	16.0091	4.60251	1076	niemann-Pick C1 protein
NCU09026	CBNBSNCU00340_peak_3013	10.9564	4.24165	1076	feruloyl esterase B
NCU06789	CBNBSNCU00340_peak_1014	7.62421	3.07531	1079	hypothetical protein
NCU01181	CBNBSNCU00340_peak_2383	21.4783	4.79385	1080	acyl-CoA dehydrogenase family member 11
NCU00195	CBNBSNCU00340_peak_1446	13.0535	4.38389	1081	MFS transporter
NCU01678	CBNBSNCU00340_peak_1092	23.4038	6.07906	1082	amine oxidase
NCU00842	CBNBSNCU00340_peak_607	25.3977	6.51751	1083	hypothetical protein
NCU08076	CBNBSNCU00340_peak_7	19.2532	5.1999	1084	TPR domain-containing protein
NCU01648	CBNBSNCU00340_peak_1096	7.99193	3.55596	1084	dolichyl-phosphate-mannose-protein mannosyltransferase 2
NCU17004	CBNBSNCU00340_peak_2468	19.2048	4.40107	1084	hypothetical protein
NCU06838	CBNBSNCU00340_peak_1002	22.3594	5.85503	1085	hypothetical protein
NCU01786	CBNBSNCU00340_peak_1067	8.10703	3.17418	1086	ribose-phosphate pyrophosphokinase II
NCU05387	CBNBSNCU00340_peak_974	29.5413	6.78887	1087	hydrolase
NCU04667	CBNBSNCU00340_peak_2193	24.8987	5.91953	1087	hypothetical protein
NCU04902	CBNBSNCU00340_peak_1693	46.833	9.65399	1090	sodium-hydrogen antiporter
NCU03015	CBNBSNCU00340_peak_755	37.0526	8.06813	1091	hypothetical protein
NCU07967	CBNBSNCU00340_peak_1724	15.378	4.41497	1091	hypothetical protein
NCU07739	CBNBSNCU00340_peak_2154	19.9495	5.40991	1091	YTP1
NCU01230	CBNBSNCU00340_peak_2396	20.1679	5.5449	1092	serum paraoxonase/arylesterase
NCU08695	CBNBSNCU00340_peak_1962	13.8698	4.00413	1093	hypothetical protein
NCU05574	CBNBSNCU00340_peak_2799	9.33503	2.95776	1093	hypothetical protein
NCU08545	CBNBSNCU00340_peak_1607	40.0676	8.40463	1094	hypothetical protein
NCU03607	CBNBSNCU00340_peak_2248	7.72502	3.50395	1094	threonine dehydratase catabolic
NCU05555	CBNBSNCU00340_peak_2809	41.0636	8.77731	1096	hypothetical protein
NCU08027	CBNBSNCU00340_peak_1951	30.4277	6.86943	1099	nucleoside diphosphatase
NCU01476	CBNBSNCU00340_peak_2519	8.42344	3.58776	1099	hypothetical protein
NCU02344	CBNBSNCU00340_peak_3185	40.5159	6.73413	1100	fungal cellulose binding domain-containing protein
NCU01335	CBNBSNCU00340_peak_2435	17.1902	5.43653	1102	cell division control protein 15
NCU02378	CBNBSNCU00340_peak_3175	19.1263	4.73391	1103	integral membrane protein
NCU03020	CBNBSNCU00340_peak_753	17.0741	5.35284	1104	IdgA domain-containing protein
NCU09350	CBNBSNCU00340_peak_1198	16.7243	4.6023	1104	aspartic-type endopeptidase
NCU11308	CBNBSNCU00340_peak_3272	33.5728	5.63019	1105	hypothetical protein
NCU08373	CBNBSNCU00340_peak_502	12.4559	4.19715	1106	peroxisomal biogenesis factor 6
NCU00103	CBNBSNCU00340_peak_1425	34.9949	7.29978	1108	hypothetical protein
NCU08222	CBNBSNCU00340_peak_1594	36.0631	7.73021	1108	hypothetical protein
NCU07253	CBNBSNCU00340_peak_2007	13.0036	4.22113	1109	"1,3-beta-glucanosyltransferase gel1"
NCU03601	CBNBSNCU00340_peak_2244	12.3007	4.33065	1109	integral membrane protein
NCU09253	CBNBSNCU00340_peak_837	17.4089	4.69596	1110	DUF907 domain-containing protein
NCU09057	CBNBSNCU00340_peak_3022	13.4261	4.10277	1112	hypothetical protein
NCU02465	CBNBSNCU00340_peak_221	8.8035	3.64989	1114	hypothetical protein
NCU02910	CBNBSNCU00340_peak_785	31.7924	8.12503	1114	hypothetical protein
NCU00224	CBNBSNCU00340_peak_1453	41.0166	8.29613	1114	hypothetical protein
NCU03296	CBNBSNCU00340_peak_476	24.8611	5.7959	1117	F1 ATPase assembly protein 11
NCU04843	CBNBSNCU00340_peak_2761	21.3942	5.72857	1118	hypothetical protein
NCU05629	CBNBSNCU00340_peak_2780	42.2349	8.19354	1118	hypothetical protein
NCU16473	CBNBSNCU00340_peak_784	12.7786	4.69708	1119	hypothetical protein
NCU16823	CBNBSNCU00340_peak_1941	22.1519	5.81582	1119	hypothetical protein
NCU04799	CBNBSNCU00340_peak_2742	24.2257	5.56494	1119	polyadenylate-binding protein
NCU00343	CBNBSNCU00340_peak_1502	15.7797	4.29032	1120	hypothetical protein
NCU09382	CBNBSNCU00340_peak_352	12.4534	3.61609	1123	TPR domain-containing protein
NCU00453	CBNBSNCU00340_peak_1535	17.8865	5.36552	1123	sodium/hydrogen exchanger 3
NCU16911	CBNBSNCU00340_peak_2102	16.8324	4.92581	1123	hypothetical protein
NCU06025	CBNBSNCU00340_peak_3154	29.3482	6.28859	1124	"quinate-3, qa-3"
NCU02337	CBNBSNCU00340_peak_3187	19.0711	5.01472	1125	mitochondrial carrier protein
NCU07525	CBNBSNCU00340_peak_1580	19.6399	5.23251	1126	hypothetical protein
NCU04760	CBNBSNCU00340_peak_2730	27.6485	6.48392	1127	golgi apparatus membrane protein tvp-18
NCU01555	CBNBSNCU00340_peak_1120	11.8647	4.16567	1130	hypothetical protein
NCU05880	CBNBSNCU00340_peak_3284	38.5958	8.03267	1130	hypothetical protein
NCU08153	CBNBSNCU00340_peak_3232	45.169	9.1918	1131	phosphodiesterase/alkaline phosphatase D
NCU08600	CBNBSNCU00340_peak_852	24.6756	6.88829	1132	hypothetical protein
NCU10003	CBNBSNCU00340_peak_1237	47.9965	9.82609	1133	HET domain-containing protein
NCU04801	CBNBSNCU00340_peak_2743	30.2167	6.75816	1133	hypothetical protein
NCU06425	CBNBSNCU00340_peak_1314	32.0085	7.41399	1134	hypothetical protein
NCU04692	CBNBSNCU00340_peak_2703	43.4152	8.10711	1136	hypothetical protein
NCU09589	CBNBSNCU00340_peak_3052	19.2532	5.14838	1136	hypothetical protein
NCU04278	CBNBSNCU00340_peak_2599	24.5376	6.24784	1139	hypothetical protein
NCU16307	CBNBSNCU00340_peak_17	14.7871	4.9997	1140	hypothetical protein
NCU07986	CBNBSNCU00340_peak_1933	29.0185	6.66574	1140	membrane protein TMS1
NCU01993	CBNBSNCU00340_peak_165	12.7992	4.4224	1142	ethanolaminephosphotransferase
NCU06857	CBNBSNCU00340_peak_996	9.3966	3.85065	1142	hypothetical protein
NCU00566	CBNBSNCU00340_peak_703	17.1644	4.85873	1144	synaptobrevin
NCU09270	CBNBSNCU00340_peak_2997	30.3951	6.99874	1144	hypothetical protein
NCU02599	CBNBSNCU00340_peak_283	9.18975	3.90198	1145	BAP31 domain-containing protein
NCU07809	CBNBSNCU00340_peak_2123	23.168	5.38281	1145	hypothetical protein
NCU08319	CBNBSNCU00340_peak_1825	30.5883	7.58759	1147	developmental regulator flbA
NCU04672	CBNBSNCU00340_peak_2190	25.2909	4.7417	1147	MatE family transporter
NCU09740	CBNBSNCU00340_peak_1782	15.0215	4.88853	1148	cell morphogenesis protein
NCU03854	CBNBSNCU00340_peak_2842	25.5096	6.18441	1148	D-tyrosyl-tRNA(Tyr) deacylase
NCU06645	CBNBSNCU00340_peak_2474	9.87259	3.79184	1149	hypothetical protein
NCU03066	CBNBSNCU00340_peak_396	16.0472	4.47741	1151	GTP-binding protein
NCU10772	CBNBSNCU00340_peak_738	13.5967	4.72546	1152	hypothetical protein
NCU09294	CBNBSNCU00340_peak_2991	8.9189	3.93854	1152	hypothetical protein
NCU16314	CBNBSNCU00340_peak_41	13.2192	4.34053	1153	hypothetical protein
NCU00811	CBNBSNCU00340_peak_619	12.8993	4.54201	1153	hypothetical protein
NCU00528	CBNBSNCU00340_peak_721	10.784	4.43692	1153	FHA domain-containing protein
NCU02918	CBNBSNCU00340_peak_778	49.675	10.088	1154	"polyketide synthase-6, pks-6"
NCU08251	CBNBSNCU00340_peak_1601	32.5833	6.45993	1155	hypothetical protein
NCU06781	CBNBSNCU00340_peak_1016	15.3233	4.51847	1156	"1,3-beta-glucanosyltransferase Gel2"
NCU05977	CBNBSNCU00340_peak_2914	35.6242	7.66651	1156	dihydrodipicolinate synthase (LRA4?)
NCU05596	CBNBSNCU00340_peak_2791	8.67688	3.11321	1157	hypothetical protein
NCU16357	CBNBSNCU00340_peak_223	13.3069	4.48665	1160	hypothetical protein
NCU06489	CBNBSNCU00340_peak_1341	11.3741	4.08292	1160	WD repeat protein
NCU02572	CBNBSNCU00340_peak_267	12.3007	4.2746	1161	U5 small nuclear ribonucleoprotein component
NCU03055	CBNBSNCU00340_peak_389	31.0978	7.3963	1164	"alpha-1,6-mannosyltransferase subunit"
NCU07075	CBNBSNCU00340_peak_2693	12.8856	4.52579	1165	calcium/proton exchanger
NCU02155	CBNBSNCU00340_peak_105	25.0962	6.33141	1166	hypothetical protein
NCU03142	CBNBSNCU00340_peak_426	16.387	4.73627	1167	hypothetical protein
NCU10042	CBNBSNCU00340_peak_534	26.1543	6.05847	1169	enolase
NCU03758	CBNBSNCU00340_peak_2298	8.41275	3.56241	1169	hypothetical protein
NCU01208	CBNBSNCU00340_peak_2392	25.156	5.88647	1171	hypothetical protein
NCU00923	CBNBSNCU00340_peak_578	12.2196	4.32524	1172	hypothetical protein
NCU06552	CBNBSNCU00340_peak_1751	15.5553	5.22429	1172	dolichyl-P-Man:Man(5)GlcNAc(2)-PP-dolichyl mannosyltransferase
NCU03219	CBNBSNCU00340_peak_450	14.2027	3.8246	1173	Kex2
NCU07844	CBNBSNCU00340_peak_1289	20.9546	5.10183	1173	hypothetical protein
NCU16633	CBNBSNCU00340_peak_1334	10.4493	3.92387	1176	hypothetical protein
NCU01258	CBNBSNCU00340_peak_2409	25.8803	6.13981	1177	cyanase
NCU02504	CBNBSNCU00340_peak_240	12.7941	4.08716	1178	DUF1640 domain-containing protein
NCU08867	CBNBSNCU00340_peak_2106	10.0343	4.05237	1178	hypothetical protein
NCU02128	CBNBSNCU00340_peak_115	15.8834	4.93287	1181	D-arabinitol dehydrogenase
NCU07889	CBNBSNCU00340_peak_1305	13.3687	4.67481	1181	hypothetical protein
NCU00419	CBNBSNCU00340_peak_1524	34.7458	7.1204	1181	DNA-directed RNA polymerase I and III polypeptide
NCU01381	CBNBSNCU00340_peak_2449	23.3333	5.69308	1182	hypothetical protein
NCU09060	CBNBSNCU00340_peak_3023	43.6676	9.20436	1183	hypothetical protein
NCU00537	CBNBSNCU00340_peak_717	15.6917	4.68476	1184	hypothetical protein
NCU09612	CBNBSNCU00340_peak_876	9.03513	3.893	1184	hypothetical protein
NCU03417	CBNBSNCU00340_peak_938	42.3651	7.96199	1184	hypothetical protein
NCU04274	CBNBSNCU00340_peak_2597	12.6725	4.40366	1184	nuclear envelope protein Cut8
NCU05923	CBNBSNCU00340_peak_2935	17.0913	4.82213	1185	cellobiose dehydrogenase
NCU06083	CBNBSNCU00340_peak_3135	43.3992	7.85147	1185	hypothetical protein
NCU02161	CBNBSNCU00340_peak_103	40.3594	7.7947	1186	hypothetical protein
NCU06064	CBNBSNCU00340_peak_3139	13.6609	4.37567	1186	hypothetical protein
NCU03525	CBNBSNCU00340_peak_891	15.2128	4.73837	1187	"3-oxyacyl-[acyl carrier protein] reductase 1, oar1"
NCU09657	CBNBSNCU00340_peak_1637	8.38463	3.75846	1188	hypothetical protein
NCU06142	CBNBSNCU00340_peak_3110	9.78174	3.57201	1188	hypothetical protein
NCU08613	CBNBSNCU00340_peak_858	34.5262	7.03102	1189	hypothetical protein
NCU16503	CBNBSNCU00340_peak_898	8.38463	3.77891	1189	hypothetical protein
NCU03555	CBNBSNCU00340_peak_883	16.2155	4.79226	1191	hypothetical protein
NCU02165	CBNBSNCU00340_peak_101	17.4089	5.06751	1193	hypothetical protein
NCU02505	CBNBSNCU00340_peak_241	15.5475	4.78176	1196	"succinate, suc"
NCU02726	CBNBSNCU00340_peak_340	8.54411	3.67682	1196	ethanolamine kinase
NCU04814	CBNBSNCU00340_peak_2748	20.7303	5.68453	1196	DUF21 and CBS domain-containing protein
NCU06525	CBNBSNCU00340_peak_1745	52.9761	10.2848	1198	hypothetical protein
NCU07979	CBNBSNCU00340_peak_1931	41.0032	7.83861	1200	hypothetical protein
NCU04196	CBNBSNCU00340_peak_2566	45.6117	8.44144	1200	tRNA (adenine-N(1)-)-methyltransferase catalytic subunit trm61
NCU03806	CBNBSNCU00340_peak_2312	16.7243	4.58669	1201	ribosomal protein L27a.e
NCU06200	CBNBSNCU00340_peak_1364	26.9566	6.10998	1202	DUF1682 domain-containing protein
NCU09734	CBNBSNCU00340_peak_1784	19.2532	5.13121	1203	hypothetical protein
NCU09325	CBNBSNCU00340_peak_378	6.7308	2.79432	1204	WD domain-containing protein
NCU00580	CBNBSNCU00340_peak_702	13.322	4.24954	1204	acyl-CoA thioesterase
NCU06054	CBNBSNCU00340_peak_3148	34.8862	7.40907	1205	squalene synthetase
NCU06129	CBNBSNCU00340_peak_3114	11.7511	4.29647	1206	hypothetical protein
NCU03716	CBNBSNCU00340_peak_2284	37.29	6.1918	1207	hypothetical protein
NCU06156	CBNBSNCU00340_peak_3107	40.6899	7.66163	1207	hypothetical protein
NCU02453	CBNBSNCU00340_peak_3158	13.9511	4.58822	1207	hypothetical protein
NCU07854	CBNBSNCU00340_peak_1295	13.1199	3.78858	1210	cytosolic regulator Pianissimo
NCU05020	CBNBSNCU00340_peak_2972	43.4432	9.25287	1210	hypothetical protein
NCU16539	CBNBSNCU00340_peak_991	41.9693	7.45249	1211	hypothetical protein
NCU03182	CBNBSNCU00340_peak_439	27.0827	6.35213	1212	hypothetical protein
NCU00589	CBNBSNCU00340_peak_695	51.2337	10.3984	1212	auxin Efflux Carrier superfamily
NCU02683	CBNBSNCU00340_peak_330	10.8651	3.58916	1213	hypothetical protein
NCU01256	CBNBSNCU00340_peak_2407	18.1794	4.67309	1213	glutamine amidotransferase
NCU08099	CBNBSNCU00340_peak_18	10.3036	4.07758	1215	hypothetical protein
NCU08597	CBNBSNCU00340_peak_848	25.6574	6.3744	1215	hypothetical protein
NCU03285	CBNBSNCU00340_peak_470	8.14377	3.35858	1218	hypothetical protein
NCU02894	CBNBSNCU00340_peak_789	26.3429	5.53524	1220	flavin-binding monooxygenase
NCU01798	CBNBSNCU00340_peak_1057	39.2488	7.27166	1220	hypothetical protein
NCU01191	CBNBSNCU00340_peak_2387	24.9247	5.52759	1221	hypothetical protein
NCU03879	CBNBSNCU00340_peak_2847	36.1198	7.41115	1221	hypothetical protein
NCU09053	CBNBSNCU00340_peak_3020	36.798	7.67451	1221	hypothetical protein
NCU01998	CBNBSNCU00340_peak_160	8.90652	3.35806	1222	septin
NCU02492	CBNBSNCU00340_peak_234	30.7864	6.94662	1222	hypothetical protein
NCU06186	CBNBSNCU00340_peak_1356	47.307	8.38023	1222	hypothetical protein
NCU06486	CBNBSNCU00340_peak_1339	11.6676	4.05168	1224	hypothetical protein
NCU01275	CBNBSNCU00340_peak_2416	8.37769	3.71803	1225	oxidoreductase
NCU00025	CBNBSNCU00340_peak_1401	25.8444	5.90018	1226	integral membrane protein
NCU03969	CBNBSNCU00340_peak_2865	47.6401	8.72059	1228	hypothetical protein
NCU01512	CBNBSNCU00340_peak_1129	14.4978	4.8093	1231	phenylalanyl-tRNA synthetase
NCU00849	CBNBSNCU00340_peak_604	17.5058	5.35723	1232	hypothetical protein
NCU01635	CBNBSNCU00340_peak_1100	39.1364	7.45977	1232	"histone H3, hH3"
NCU09738	CBNBSNCU00340_peak_1783	9.08447	3.86785	1232	alpha-ketoglutarate dependent xanthine dioxygenase
NCU01270	CBNBSNCU00340_peak_2414	13.2849	4.53751	1232	ribose-phosphate pyrophosphokinase II
NCU04216	CBNBSNCU00340_peak_2574	16.639	5.36979	1232	amidophosphoribosyltransferase
NCU00343	CBNBSNCU00340_peak_1502	15.7797	4.29032	1233	hypothetical protein
NCU07466	CBNBSNCU00340_peak_53	11.7198	4.03224	1234	cystathionine beta-synthase
NCU02390	CBNBSNCU00340_peak_3170	37.0478	7.61688	1236	hypothetical protein
NCU06601	CBNBSNCU00340_peak_1765	9.25316	3.92397	1239	hypothetical protein
NCU08347	CBNBSNCU00340_peak_508	22.013	5.37546	1240	hypothetical protein
NCU07375	CBNBSNCU00340_peak_548	7.09234	3.40729	1241	MFS phosphate transporter
NCU08152	CBNBSNCU00340_peak_3231	26.3943	6.92577	1241	high affinity glucose transporter
NCU04720	CBNBSNCU00340_peak_2716	12.0382	3.76087	1243	"nitrate nonutilizer-6, nit-6"
NCU02460	CBNBSNCU00340_peak_3155	41.5672	7.8129	1243	syntaxin family protein
NCU09203	CBNBSNCU00340_peak_524	21.4901	5.40595	1246	transcription factor iws-1
NCU07163	CBNBSNCU00340_peak_2666	16.7033	4.75379	1246	hypothetical protein
NCU06166	CBNBSNCU00340_peak_3101	18.2523	5.85186	1246	"alpha-1,2-mannosyltransferase"
NCU06516	CBNBSNCU00340_peak_1743	34.7424	7.55204	1248	hypothetical protein
NCU08734	CBNBSNCU00340_peak_1177	27.8733	6.74241	1249	hypothetical protein
NCU06475	CBNBSNCU00340_peak_1332	16.7243	4.58669	1250	hypothetical protein
NCU05962	CBNBSNCU00340_peak_2921	40.382	7.65216	1250	hypothetical protein
NCU02761	CBNBSNCU00340_peak_349	32.6249	6.51624	1252	hypothetical protein
NCU09580	CBNBSNCU00340_peak_3057	15.5437	4.85293	1252	MSF membrane transporter
NCU07116	CBNBSNCU00340_peak_2680	26.9566	6.10998	1253	hypothetical protein
NCU11319	CBNBSNCU00340_peak_1321	33.5648	6.98572	1254	hypothetical protein
NCU01310	CBNBSNCU00340_peak_2429	21.2247	4.91994	1255	hypothetical protein
NCU08642	CBNBSNCU00340_peak_868	32.7224	6.81401	1256	cyclic nucleotide-binding domain-containing protein
NCU09823	CBNBSNCU00340_peak_2157	7.05001	3.35459	1256	hypothetical protein
NCU08370	CBNBSNCU00340_peak_503	40.1037	7.34972	1259	sporulation protein RMD8
NCU06646	CBNBSNCU00340_peak_2474	9.87259	3.79184	1260	RNA polymerase II transcription factor B subunit 5
NCU07012	CBNBSNCU00340_peak_2031	12.3568	4.10093	1264	hypothetical protein
NCU02582	CBNBSNCU00340_peak_275	22.2617	5.77941	1265	sorbose-resistant-4
NCU01190	CBNBSNCU00340_peak_2386	11.5588	3.83739	1265	DUF410 domain-containing protein
NCU03827	CBNBSNCU00340_peak_2319	20.8417	4.73961	1267	40S ribosomal protein S9
NCU01268	CBNBSNCU00340_peak_2413	29.0887	6.66563	1267	ubiquitin-conjugating enzyme E2 6
NCU05825	CBNBSNCU00340_peak_3269	10.2942	4.01257	1268	hypothetical protein
NCU09479	CBNBSNCU00340_peak_1209	49.61	9.2579	1269	hypothetical protein
NCU09206	CBNBSNCU00340_peak_526	32.5833	6.52237	1271	hypothetical protein
NCU07826	CBNBSNCU00340_peak_1278	34.7634	7.78304	1271	40S ribosomal protein S19
NCU00912	CBNBSNCU00340_peak_585	23.168	5.39842	1272	hypothetical protein
NCU07840	CBNBSNCU00340_peak_1288	12.4534	3.62836	1272	hypothetical protein
NCU02964	CBNBSNCU00340_peak_765	29.3574	5.46029	1273	hypothetical protein
NCU04501	CBNBSNCU00340_peak_1882	31.7539	6.09331	1274	hypothetical protein
NCU00669	CBNBSNCU00340_peak_662	17.0017	4.59569	1275	oligosaccharyl transferase subunit
NCU04581	CBNBSNCU00340_peak_2230	24.8851	6.65898	1277	kinesin
NCU03240	CBNBSNCU00340_peak_456	21.5094	5.79983	1280	hypothetical protein
NCU07778	CBNBSNCU00340_peak_2139	12.1714	3.93105	1282	hypothetical protein
NCU16668	CBNBSNCU00340_peak_1450	19.5137	4.94572	1284	hypothetical protein
NCU10468	CBNBSNCU00340_peak_2424	27.0985	5.59248	1284	arginine biosynthesis argJ
NCU04245	CBNBSNCU00340_peak_2585	24.1109	5.27767	1285	translocase of outer mitochondrial membrane 70
NCU02479	CBNBSNCU00340_peak_228	15.9758	4.83124	1286	glutamine synthetase
NCU03399	CBNBSNCU00340_peak_942	18.7955	4.1085	1286	hypothetical protein
NCU10400	CBNBSNCU00340_peak_1730	28.1415	6.45087	1286	phospholipase PldA
NCU06906	CBNBSNCU00340_peak_3043	30.1809	5.93591	1286	hypothetical protein
NCU08338	CBNBSNCU00340_peak_514	35.9725	7.31944	1287	hypothetical protein
NCU02607	CBNBSNCU00340_peak_286	22.8764	4.92562	1288	hypothetical protein
NCU06301	CBNBSNCU00340_peak_1871	26.5538	6.50911	1288	hypothetical protein
NCU00833	CBNBSNCU00340_peak_611	14.1614	4.84084	1289	hypothetical protein
NCU03321	CBNBSNCU00340_peak_483	17.9103	4.24162	1290	eukaryotic ribosome biogenesis protein 1
NCU06096	CBNBSNCU00340_peak_3125	42.8405	8.506	1290	hypothetical protein
NCU07404	CBNBSNCU00340_peak_540	21.4716	5.54703	1291	alpha-mannosidase
NCU05594	CBNBSNCU00340_peak_2793	10.2257	3.93191	1291	L-galactose dehydrogenase
NCU10852	CBNBSNCU00340_peak_488	7.70577	3.68806	1293	exochitinase
NCU06561	CBNBSNCU00340_peak_1752	14.3746	4.64247	1293	rho-gdp dissociation inhibitor
NCU06003	CBNBSNCU00340_peak_2907	41.0981	7.6475	1294	mannose-1-phosphate guanyltransferase
NCU00830	CBNBSNCU00340_peak_614	23.3661	5.23126	1295	"ctr copper transporter, tcu-1"
NCU02676	CBNBSNCU00340_peak_328	12.7992	4.46106	1296	hypothetical protein
NCU05811	CBNBSNCU00340_peak_3264	50.346	9.48929	1298	hypothetical protein
NCU08601	CBNBSNCU00340_peak_854	38.3049	7.91455	1299	hypothetical protein
NCU16776	CBNBSNCU00340_peak_1803	10.8651	3.60346	1300	hypothetical protein
NCU07869	CBNBSNCU00340_peak_1301	13.2849	4.46119	1304	INSIG domain-containing protein
NCU03459	CBNBSNCU00340_peak_920	15.4182	5.01034	1305	UBA domain-containing protein Ucp14
NCU07618	CBNBSNCU00340_peak_1665	9.78174	3.58763	1305	hypothetical protein
NCU06334	CBNBSNCU00340_peak_1861	11.9459	3.65649	1306	hypothetical protein
NCU04234	CBNBSNCU00340_peak_2583	49.2238	9.2501	1306	hypothetical protein
NCU03065	CBNBSNCU00340_peak_395	19.1263	4.70529	1307	mitotic control protein dis3
NCU00006	CBNBSNCU00340_peak_1394	25.9668	6.62142	1312	hypothetical protein
NCU16657	CBNBSNCU00340_peak_1426	40.6899	7.67843	1312	tryptophanyl-tRNA synthetase
NCU05779	CBNBSNCU00340_peak_3255	43.5289	7.69314	1313	hypothetical protein
NCU00804	CBNBSNCU00340_peak_623	15.0052	4.58173	1317	hypothetical protein
NCU04626	CBNBSNCU00340_peak_2211	18.5244	5.0797	1318	G-protein coupled receptor
NCU05771	CBNBSNCU00340_peak_3252	45.7795	8.30792	1318	hypothetical protein
NCU03770	CBNBSNCU00340_peak_2301	31.6516	6.66946	1319	cell wall glycosyl hydrolase Dfg5
NCU07027	CBNBSNCU00340_peak_2037	11.4505	4.12378	1321	glycogen phosphorylase
NCU05564	CBNBSNCU00340_peak_2803	3.69263	2.20892	1321	peroxisomal membrane protein PEX31
NCU02591	CBNBSNCU00340_peak_277	8.0179	3.57718	1323	glycerol:H+ symporter
NCU01725	CBNBSNCU00340_peak_1079	40.126	6.81401	1323	hypothetical protein
NCU03614	CBNBSNCU00340_peak_2251	13.8927	4.5041	1323	hypothetical protein
NCU01420	CBNBSNCU00340_peak_2462	18.4992	5.20254	1324	hypothetical protein
NCU04290	CBNBSNCU00340_peak_2602	13.9725	4.63291	1324	hypothetical protein
NCU01684	CBNBSNCU00340_peak_1091	9.92553	3.93713	1326	hypothetical protein
NCU07665	CBNBSNCU00340_peak_1822	11.7923	4.36848	1327	ubiquitin-conjugating enzyme
NCU17176	CBNBSNCU00340_peak_3047	13.4713	4.44921	1329	alpha/beta hydrolase
NCU10101	CBNBSNCU00340_peak_2082	21.9861	6.17024	1330	hypothetical protein
NCU10091	CBNBSNCU00340_peak_2214	43.1836	7.26669	1331	hypothetical protein
NCU02628	CBNBSNCU00340_peak_301	16.0472	4.53986	1333	hypothetical protein
NCU04279	CBNBSNCU00340_peak_2599	24.5376	6.24784	1333	protein kinase domain-containing protein
NCU06051	CBNBSNCU00340_peak_3150	16.3152	5.04086	1339	hypothetical protein
NCU05480	CBNBSNCU00340_peak_992	42.2349	7.91297	1340	hypothetical protein
NCU16686	CBNBSNCU00340_peak_1554	15.8225	4.4949	1340	hypothetical protein
NCU11088	CBNBSNCU00340_peak_1213	15.1347	4.21877	1341	MGMT family protein
NCU01100	CBNBSNCU00340_peak_2354	13.4584	4.60197	1341	hypothetical protein
NCU07206	CBNBSNCU00340_peak_2660	28.8381	7.19369	1342	hypothetical protein
NCU04743	CBNBSNCU00340_peak_2724	7.07272	3.3071	1342	tubulin-tyrosine ligase
NCU00619	CBNBSNCU00340_peak_682	12.4078	4.5972	1343	hypothetical protein
NCU01579	CBNBSNCU00340_peak_1113	11.7198	4.06659	1344	hypothetical protein
NCU09806	CBNBSNCU00340_peak_366	25.4502	6.01384	1345	hypothetical protein
NCU05101	CBNBSNCU00340_peak_2956	8.19527	3.64078	1349	hypothetical protein
NCU05775	CBNBSNCU00340_peak_3253	12.3568	4.18679	1349	amino acid transporter
NCU03003	CBNBSNCU00340_peak_758	46.1044	9.25351	1351	hypothetical protein
NCU03260	CBNBSNCU00340_peak_461	20.0492	4.75802	1352	hypothetical protein
NCU10092	CBNBSNCU00340_peak_2216	12.4534	3.64062	1352	hypothetical protein
NCU09188	CBNBSNCU00340_peak_1234	31.0464	6.60795	1353	hypothetical protein
NCU06759	CBNBSNCU00340_peak_1023	9.88584	2.98423	1354	hypothetical protein
NCU00252	CBNBSNCU00340_peak_1464	24.9247	5.60397	1355	hypothetical protein
NCU07257	CBNBSNCU00340_peak_2005	31.8086	5.86235	1355	F-box domain-containing protein
NCU07100	CBNBSNCU00340_peak_2688	19.9312	5.95451	1355	hypothetical protein
NCU06134	CBNBSNCU00340_peak_3113	24.038	6.3012	1355	hypothetical protein
NCU07893	CBNBSNCU00340_peak_1741	13.6829	4.76795	1356	RSC complex subunit Sfh1
NCU02521	CBNBSNCU00340_peak_246	31.5472	6.16345	1357	hypothetical protein
NCU01768	CBNBSNCU00340_peak_1073	12.0382	3.83242	1357	hypothetical protein
NCU02558	CBNBSNCU00340_peak_265	48.3549	9.04387	1361	MADS-box MEF2 type transcription factor
NCU09360	CBNBSNCU00340_peak_359	16.387	4.7191	1361	hypothetical protein
NCU00445	CBNBSNCU00340_peak_1534	23.53	6.11461	1361	hypothetical protein
NCU04848	CBNBSNCU00340_peak_2765	51.25	9.58537	1361	hypothetical protein
NCU00592	CBNBSNCU00340_peak_694	13.1229	4.59139	1364	pre-mRNA-splicing factor cwc-25
NCU07966	CBNBSNCU00340_peak_1724	15.378	4.41497	1364	calcium-transporting ATPase 3
NCU01009	CBNBSNCU00340_peak_2330	28.1797	6.57234	1365	hypothetical protein
NCU07492	CBNBSNCU00340_peak_35	47.2085	9.25278	1366	hypothetical protein
NCU09775	CBNBSNCU00340_peak_1202	37.377	8.4965	1366	alpha-N-arabinofuranosidase
NCU05385	CBNBSNCU00340_peak_973	17.5552	5.20529	1367	hypothetical protein
NCU05460	CBNBSNCU00340_peak_990	13.0036	4.25547	1367	hypothetical protein
NCU01415	CBNBSNCU00340_peak_2459	20.9546	5.13305	1367	hypothetical protein
NCU12091	CBNBSNCU00340_peak_2761	21.3942	5.72857	1367	hypothetical protein
NCU04277	CBNBSNCU00340_peak_2598	42.6208	7.71213	1370	homoserine kinase
NCU02592	CBNBSNCU00340_peak_277	8.0179	3.57718	1372	chitin synthase activator
NCU02810	CBNBSNCU00340_peak_810	23.648	5.32981	1373	eukaryotic translation initiation factor 2 gamma subunit
NCU16563	CBNBSNCU00340_peak_1106	11.5588	3.88422	1373	hypothetical protein
NCU06944	CBNBSNCU00340_peak_3049	10.9363	3.953	1374	hypothetical protein
NCU02515	CBNBSNCU00340_peak_244	25.3591	5.90392	1375	dipeptidyl aminopeptidase
NCU07931	CBNBSNCU00340_peak_1735	10.2722	3.87212	1376	glyoxylate reductase
NCU02160	CBNBSNCU00340_peak_103	40.3594	7.7947	1379	small GTPase RAC
NCU08337	CBNBSNCU00340_peak_514	35.9725	7.31944	1379	hypothetical protein
NCU01162	CBNBSNCU00340_peak_2373	14.5777	4.59497	1379	glycolipid-anchored surface protein 5
NCU01427	CBNBSNCU00340_peak_2465	8.63884	3.30297	1379	"albino-3, al-3"
NCU08753	CBNBSNCU00340_peak_1630	16.387	4.75344	1380	hypothetical protein
NCU06943	CBNBSNCU00340_peak_3049	10.9363	3.953	1380	SIK1
NCU05133	CBNBSNCU00340_peak_2949	11.5803	3.82735	1384	udp-glucose 4-epimerase
NCU03274	CBNBSNCU00340_peak_467	23.168	5.41403	1385	hypothetical protein
NCU05022	CBNBSNCU00340_peak_2971	8.97873	3.81494	1385	hypothetical protein
NCU17176	CBNBSNCU00340_peak_3047	13.4713	4.44921	1385	alpha/beta hydrolase
NCU07294	CBNBSNCU00340_peak_1999	30.0842	6.70322	1386	hypothetical protein
NCU01954	CBNBSNCU00340_peak_176	33.137	7.62555	1387	pre-mRNA-splicing factor cwc-24
NCU00795	CBNBSNCU00340_peak_625	26.0533	5.12472	1387	membrane bound cation transporter
NCU03885	CBNBSNCU00340_peak_2851	9.41384	3.81793	1387	hypothetical protein
NCU16330	CBNBSNCU00340_peak_107	25.3836	6.15044	1388	hypothetical protein
NCU01530	CBNBSNCU00340_peak_1124	11.3731	3.60366	1388	hypothetical protein
NCU01645	CBNBSNCU00340_peak_1097	32.6824	5.75025	1389	hypothetical protein
NCU16614	CBNBSNCU00340_peak_1239	40.0272	8.68625	1389	hypothetical protein
NCU07562	CBNBSNCU00340_peak_1572	16.0686	4.85757	1393	60S ribosomal protein L43
NCU02022	CBNBSNCU00340_peak_154	34.0064	8.08883	1395	hypothetical protein
NCU16502	CBNBSNCU00340_peak_897	22.1283	5.60624	1395	hypothetical protein
NCU02812	CBNBSNCU00340_peak_809	15.3381	4.61965	1396	uridylate kinase
NCU00974	CBNBSNCU00340_peak_564	23.0962	6.08406	1397	glutaredoxin
NCU06589	CBNBSNCU00340_peak_1759	40.2775	8.38437	1397	hypothetical protein
NCU05529	CBNBSNCU00340_peak_2815	16.8445	4.29051	1398	hypothetical protein
NCU07948	CBNBSNCU00340_peak_1729	18.442	4.64806	1399	hypothetical protein
NCU09049	CBNBSNCU00340_peak_3018	34.8469	7.65241	1399	hypothetical protein
NCU09469	CBNBSNCU00340_peak_1208	17.1161	4.89703	1400	EF hand domain-containing protein
NCU09336	CBNBSNCU00340_peak_1195	44.5052	10.1174	1402	hypothetical protein
NCU04388	CBNBSNCU00340_peak_1915	24.9247	5.57342	1402	phosphatidylglycerol/phosphatidylinositol transfer protein
NCU08169	CBNBSNCU00340_peak_3238	12.3568	4.16962	1403	hypothetical protein
NCU09022	CBNBSNCU00340_peak_3012	11.963	4.43209	1404	hypothetical protein
NCU00871	CBNBSNCU00340_peak_597	10.5305	4.34965	1407	hypothetical protein
NCU00600	CBNBSNCU00340_peak_691	18.3485	5.68234	1407	small Rho-type GTPase
NCU07751	CBNBSNCU00340_peak_2149	11.2906	4.19408	1408	hypothetical protein
NCU09495	CBNBSNCU00340_peak_1216	19.9918	5.25141	1410	"set-domain histone methyltransferase-6, set-6"
NCU03630	CBNBSNCU00340_peak_2255	31.7705	6.42871	1410	hypothetical protein
NCU00634	CBNBSNCU00340_peak_675	29.3942	6.41906	1411	ribosomal protein L14
NCU08895	CBNBSNCU00340_peak_2169	36.9156	8.35679	1412	PNS1
NCU07776	CBNBSNCU00340_peak_2141	39.3608	8.26567	1413	"anchored cell wall protein-5, acw-5"
NCU10237	CBNBSNCU00340_peak_2479	20.9546	5.16427	1413	glycerophosphoryl diester phosphodiesterase
NCU05510	CBNBSNCU00340_peak_2821	43.0124	8.41698	1413	hypothetical protein
NCU01329	CBNBSNCU00340_peak_2433	17.6335	5.17011	1414	hypothetical protein
NCU05136	CBNBSNCU00340_peak_2946	19.0543	5.43424	1414	"endo alpha-1,4 polygalactosaminidase precusor"
NCU10529	CBNBSNCU00340_peak_803	25.0781	6.23211	1415	hypothetical protein
NCU01075	CBNBSNCU00340_peak_2345	14.2575	4.77211	1415	hypothetical protein
NCU08457	CBNBSNCU00340_peak_1154	34.1167	6.78377	1416	"easily wettable, eas"
NCU03295	CBNBSNCU00340_peak_475	18.1057	5.47216	1421	4-coumarate-CoA ligase 1
NCU09650	CBNBSNCU00340_peak_1636	11.1318	4.21022	1421	hypothetical protein
NCU00552	CBNBSNCU00340_peak_709	14.899	4.40801	1422	"albino-1, al-1"
NCU03267	CBNBSNCU00340_peak_464	12.8099	4.26141	1424	NAD+ kinase Utr1
NCU06533	CBNBSNCU00340_peak_1748	29.0185	6.66574	1424	hypothetical protein
NCU07224	CBNBSNCU00340_peak_2656	35.3792	7.13446	1425	monooxygenase
NCU12085	CBNBSNCU00340_peak_2738	12.1712	4.46728	1425	hypothetical protein
NCU02452	CBNBSNCU00340_peak_3157	27.2703	5.42647	1426	TLDc domain-containing protein 2
NCU03372	CBNBSNCU00340_peak_949	8.69872	3.5171	1427	nonspecific lipid-transfer protein
NCU06862	CBNBSNCU00340_peak_3025	29.3942	6.40189	1427	hypothetical protein
NCU00832	CBNBSNCU00340_peak_613	25.0322	6.352	1428	hypothetical protein
NCU06599	CBNBSNCU00340_peak_1765	9.25316	3.92397	1428	cellulose-binding protein
NCU03757	CBNBSNCU00340_peak_2296	8.10601	3.33786	1431	60S ribosomal protein L4-A
NCU16740	CBNBSNCU00340_peak_1692	42.7185	9.07558	1432	hypothetical protein
NCU06575	CBNBSNCU00340_peak_1756	35.7678	8.05646	1432	hypothetical protein
NCU06655	CBNBSNCU00340_peak_2477	13.8698	4.06137	1436	lipid particle protein
NCU04476	CBNBSNCU00340_peak_1887	16.8445	4.30372	1437	hypothetical protein
NCU08404	CBNBSNCU00340_peak_1183	17.4005	5.32437	1439	hypothetical protein
NCU05086	CBNBSNCU00340_peak_2960	41.92	8.66802	1447	hypothetical protein
NCU07500	CBNBSNCU00340_peak_30	21.4901	5.49181	1448	hypothetical protein
NCU02038	CBNBSNCU00340_peak_149	14.6056	4.47365	1448	hypothetical protein
NCU00403	CBNBSNCU00340_peak_1519	39.0259	6.90895	1449	"dTDP-D-glucose 4,6-dehydratase"
NCU01906	CBNBSNCU00340_peak_193	28.95	5.38229	1450	GCY protein (GaaD)
NCU02965	CBNBSNCU00340_peak_765	29.3574	5.46029	1452	origin recognition complex subunit 1
NCU07582	CBNBSNCU00340_peak_1641	7.95511	3.90779	1452	hypothetical protein
NCU05595	CBNBSNCU00340_peak_2793	10.2257	3.93191	1452	hypothetical protein
NCU05893	CBNBSNCU00340_peak_3285	36.1198	7.34037	1452	AT DNA binding protein
NCU02773	CBNBSNCU00340_peak_829	9.594	3.87309	1457	hypothetical protein
NCU01342	CBNBSNCU00340_peak_2438	31.0026	6.72104	1457	endoplasmic reticulum vesicle protein 25
NCU11241	CBNBSNCU00340_peak_737	30.9025	7.22637	1459	nuclease domain-containing protein
NCU02916	CBNBSNCU00340_peak_779	40.2211	8.57357	1460	endoglucanase II
NCU06637	CBNBSNCU00340_peak_2466	25.8007	5.24154	1460	peroxin-24 Pex24-Penicillium chrysogenum
NCU03976	CBNBSNCU00340_peak_2871	19.4139	5.13539	1460	hypothetical protein
NCU01808	CBNBSNCU00340_peak_1054	25.3429	5.0266	1461	cytochrome c
NCU08225	CBNBSNCU00340_peak_1596	13.353	4.72641	1462	high affinity nickel transporter nic1
NCU06596	CBNBSNCU00340_peak_1764	10.4129	3.89553	1464	hypothetical protein
NCU08221	CBNBSNCU00340_peak_1594	36.0631	7.73021	1467	dienelactone hydrolase
NCU00993	CBNBSNCU00340_peak_563	20.1593	4.62073	1468	hypothetical protein
NCU08281	CBNBSNCU00340_peak_1837	9.87259	3.7575	1469	hypothetical protein
NCU04639	CBNBSNCU00340_peak_2206	5.53049	3.05842	1471	non-classical export protein Nce102
NCU02630	CBNBSNCU00340_peak_306	15.7684	4.28746	1472	heat shock protein 78
NCU16634	CBNBSNCU00340_peak_1338	10.6399	4.10033	1473	hypothetical protein
NCU03448	CBNBSNCU00340_peak_927	26.2107	5.77307	1474	hypothetical protein
NCU05308	CBNBSNCU00340_peak_2065	24.0336	5.93014	1475	Zn(II)2Cys6 transcription factor
NCU06801	CBNBSNCU00340_peak_1012	14.3288	4.42719	1477	hypothetical protein
NCU08651	CBNBSNCU00340_peak_1977	23.7906	5.73221	1477	"zinc binuclear cluster-type protein, col-27"
NCU05677	CBNBSNCU00340_peak_1243	44.8861	8.27357	1478	hypothetical protein
NCU01380	CBNBSNCU00340_peak_2447	22.2064	5.70826	1478	hypothetical protein
NCU08724	CBNBSNCU00340_peak_1173	46.8936	8.88219	1479	hypothetical protein
NCU04091	CBNBSNCU00340_peak_2902	12.1607	4.20833	1480	hypothetical protein
NCU02776	CBNBSNCU00340_peak_825	14.6698	4.76646	1481	cell division control protein Cdc6
NCU04892	CBNBSNCU00340_peak_1691	26.2107	5.77307	1483	hypothetical protein
NCU02598	CBNBSNCU00340_peak_283	9.18975	3.90198	1484	hypothetical protein
NCU06436	CBNBSNCU00340_peak_1319	12.1607	4.17293	1484	hypothetical protein
NCU07622	CBNBSNCU00340_peak_1668	15.1508	4.46289	1484	hypothetical protein
NCU03444	CBNBSNCU00340_peak_928	23.4231	5.35954	1485	hypothetical protein
NCU00840	CBNBSNCU00340_peak_608	23.1118	6.54467	1490	hypothetical protein
NCU06560	CBNBSNCU00340_peak_1752	14.3746	4.64247	1490	hypothetical protein
NCU08533	CBNBSNCU00340_peak_1613	34.1659	7.33825	1491	hypothetical protein
NCU02137	CBNBSNCU00340_peak_113	14.4032	4.76157	1492	phosphatidylinositol:UDP-GlcNAc transferase PIG-C
NCU02622	CBNBSNCU00340_peak_295	26.8748	5.63744	1492	hypothetical protein
NCU05401	CBNBSNCU00340_peak_979	11.0933	3.96356	1492	hypothetical protein
NCU04805	CBNBSNCU00340_peak_2746	21.4901	5.49181	1494	hypothetical protein
NCU05675	CBNBSNCU00340_peak_1242	4.68268	2.43632	1495	hypothetical protein
NCU11222	CBNBSNCU00340_peak_1127	21.2668	5.30987	1497	hypothetical protein
NCU00585	CBNBSNCU00340_peak_698	24.3542	5.14908	1498	"albino-2, al-2"
NCU08881	CBNBSNCU00340_peak_2101	27.2271	5.81785	1499	hypothetical protein
NCU16702	CBNBSNCU00340_peak_1600	17.7653	4.53358	1501	hypothetical protein
NCU01011	CBNBSNCU00340_peak_2331	28.9029	6.55943	1502	hypothetical protein
NCU02217	CBNBSNCU00340_peak_3212	26.9566	6.19584	1502	cytochrome c oxidase-assembly factor cox-23
NCU09812	CBNBSNCU00340_peak_368	11.5662	4.21377	1503	LIM domain-containing protein
NCU06169	CBNBSNCU00340_peak_3100	40.6306	8.42441	1504	hypothetical protein
NCU00846	CBNBSNCU00340_peak_606	10.9564	3.72812	1505	hypothetical protein
NCU08726	CBNBSNCU00340_peak_1174	48.8989	9.60322	1505	fluffy
NCU11043	CBNBSNCU00340_peak_1710	11.5417	4.40991	1505	hypothetical protein
NCU04307	CBNBSNCU00340_peak_2610	43.9692	8.94492	1505	MSF1
NCU02526	CBNBSNCU00340_peak_249	13.5967	4.6847	1506	hypothetical protein
NCU03192	CBNBSNCU00340_peak_444	21.2542	5.41315	1506	hypothetical protein
NCU09219	CBNBSNCU00340_peak_531	26.0473	5.87143	1506	dopey domain-containing protein
NCU04928	CBNBSNCU00340_peak_1707	12.8166	4.07748	1506	hypothetical protein
NCU04131	CBNBSNCU00340_peak_2546	9.26714	3.61608	1508	hypothetical protein
NCU07603	CBNBSNCU00340_peak_1654	56.1841	10.5173	1510	hypothetical protein
NCU04340	CBNBSNCU00340_peak_1924	38.5827	7.73639	1510	acetyltransferase
NCU09611	CBNBSNCU00340_peak_877	49.2478	9.5913	1511	fructosamine-3-kinase
NCU02867	CBNBSNCU00340_peak_796	9.71197	3.27266	1513	hypothetical protein
NCU01119	CBNBSNCU00340_peak_2360	32.6938	6.93338	1513	lanosterol synthase
NCU09180	CBNBSNCU00340_peak_1232	17.9993	5.29515	1514	hypothetical protein
NCU02258	CBNBSNCU00340_peak_3206	36.784	6.21009	1515	hypothetical protein
NCU06063	CBNBSNCU00340_peak_3142	36.3917	7.67194	1516	long-chain-fatty-acid-CoA ligase
NCU00748	CBNBSNCU00340_peak_639	15.3233	4.51847	1517	hypothetical protein
NCU01215	CBNBSNCU00340_peak_2395	16.0091	4.60251	1520	thioesterase
NCU04098	CBNBSNCU00340_peak_2533	25.4399	5.69502	1520	monothiol glutaredoxin-5
NCU03610	CBNBSNCU00340_peak_2249	11.8779	3.18456	1521	NEDD8-conjugating enzyme UBC12
NCU06375	CBNBSNCU00340_peak_1846	23.5028	6.32172	1523	metallophosphoesterase domain-containing protein 2
NCU02138	CBNBSNCU00340_peak_114	51.0256	9.60504	1524	hypothetical protein
NCU06333	CBNBSNCU00340_peak_1861	11.9459	3.65649	1524	translocation protein SEC62
NCU08599	CBNBSNCU00340_peak_851	29.3042	7.31202	1529	hypothetical protein
NCU02693	CBNBSNCU00340_peak_332	13.4261	4.13399	1531	C-3 sterol dehydrogenase/C-4 decarboxylase
NCU01834	CBNBSNCU00340_peak_1038	25.6454	5.91356	1531	hypothetical protein
NCU09974	CBNBSNCU00340_peak_215	11.0008	4.0878	1532	fungal specific transcription factor domain-containing protein
NCU00852	CBNBSNCU00340_peak_603	16.082	4.99141	1532	endo-arabinase
NCU10016	CBNBSNCU00340_peak_3081	39.8897	8.71069	1532	thermophilic desulfurizing enzyme family protein
NCU06191	CBNBSNCU00340_peak_1359	17.5466	4.99594	1533	glutathione synthetase large subunit
NCU06214	CBNBSNCU00340_peak_1368	13.9944	4.60129	1533	hypothetical protein
NCU08185	CBNBSNCU00340_peak_3244	38.3049	7.93363	1533	hypothetical protein
NCU01298	CBNBSNCU00340_peak_2425	12.6747	4.14869	1535	hypothetical protein
NCU04907	CBNBSNCU00340_peak_1696	44.2414	8.7381	1536	hypothetical protein
NCU02191	CBNBSNCU00340_peak_3219	32.0884	7.47729	1537	hypothetical protein
NCU04649	CBNBSNCU00340_peak_2204	32.4322	7.07672	1538	dehydrase
NCU01231	CBNBSNCU00340_peak_2397	35.5829	7.07425	1541	carboxylic acid transporter
NCU05976	CBNBSNCU00340_peak_2915	17.8026	4.92516	1541	hypothetical protein
NCU01826	CBNBSNCU00340_peak_1044	9.73823	4.0614	1544	DUF250 domain membrane protein
NCU02039	CBNBSNCU00340_peak_148	16.0737	4.4683	1545	hypothetical protein
NCU02631	CBNBSNCU00340_peak_305	18.8348	5.00591	1547	DNA replication complex GINS protein psf-1
NCU16439	CBNBSNCU00340_peak_633	8.92279	4.07407	1547	hypothetical protein
NCU05255	CBNBSNCU00340_peak_2077	11.2982	4.09718	1547	hypothetical protein
NCU02952	CBNBSNCU00340_peak_769	31.5837	5.26757	1548	hypothetical protein
NCU06907	CBNBSNCU00340_peak_3043	30.1809	5.93591	1549	hypothetical protein
NCU08643	CBNBSNCU00340_peak_1979	31.9835	6.3831	1551	acid phosphatase (pho-3)
NCU03737	CBNBSNCU00340_peak_2287	35.8774	6.88141	1552	elongation factor Tu
NCU04129	CBNBSNCU00340_peak_2545	22.5543	4.73223	1552	gamma-tocopherol methyltransferase
NCU06607	CBNBSNCU00340_peak_1766	13.3069	4.48665	1553	hypothetical protein
NCU04832	CBNBSNCU00340_peak_2758	33.0732	7.22187	1553	2-dehydropantoate 2-reductase
NCU02578	CBNBSNCU00340_peak_271	13.4261	4.16521	1554	paired amphipathic helix protein Sin3a
NCU04871	CBNBSNCU00340_peak_1686	41.8117	8.00986	1554	hypothetical protein
NCU04212	CBNBSNCU00340_peak_2572	21.947	5.22205	1555	hypothetical protein
NCU08194	CBNBSNCU00340_peak_1589	24.5532	6.12109	1558	hypothetical protein
NCU09729	CBNBSNCU00340_peak_1786	15.6917	4.65041	1560	hypothetical protein
NCU03678	CBNBSNCU00340_peak_2267	18.0403	5.05827	1560	ssh-4
NCU07953	CBNBSNCU00340_peak_1726	38.5182	7.14257	1561	"alternative oxidase-1, aod-1"
NCU10270	CBNBSNCU00340_peak_1892	15.5157	4.6507	1563	hypothetical protein
NCU09308	CBNBSNCU00340_peak_385	10.4431	4.03555	1564	glycoprotease
NCU01477	CBNBSNCU00340_peak_2519	8.42344	3.58776	1565	hypothetical protein
NCU01856	CBNBSNCU00340_peak_210	19.1346	5.43836	1566	transcriptional activator hac1
NCU00321	CBNBSNCU00340_peak_1489	34.6258	7.42496	1566	hypothetical protein
NCU05495	CBNBSNCU00340_peak_2829	30.1651	5.91765	1566	CVNH domain-containing protein
NCU06122	CBNBSNCU00340_peak_3119	15.7797	4.27601	1566	GTPase activating protein Sar1
NCU10034	CBNBSNCU00340_peak_1138	34.9461	7.06006	1567	retrograde vesicle-mediated transporter Get1
NCU09167	CBNBSNCU00340_peak_1230	9.59601	3.62763	1567	hypothetical protein
NCU04292	CBNBSNCU00340_peak_2606	52.5682	10.1381	1568	branched-chain-amino-acid aminotransferase
NCU02920	CBNBSNCU00340_peak_777	23.3704	6.36618	1569	short-chain dehydrogenase/reductase SDR
NCU07853	CBNBSNCU00340_peak_1295	13.1199	3.78858	1569	uricase
NCU04260	CBNBSNCU00340_peak_2591	44.0314	8.44799	1569	oxidoreductase domain-containing protein
NCU09876	CBNBSNCU00340_peak_560	50.9959	9.54179	1570	hypothetical protein
NCU07491	CBNBSNCU00340_peak_37	37.1389	8.0118	1571	hypothetical protein
NCU09811	CBNBSNCU00340_peak_368	11.5662	4.21377	1572	MFS transporter
NCU05190	CBNBSNCU00340_peak_2093	36.2217	6.73387	1572	hypothetical protein
NCU16379	CBNBSNCU00340_peak_371	30.0164	6.25557	1573	hypothetical protein
NCU00680	CBNBSNCU00340_peak_657	9.4934	3.5263	1575	2-methylcitrate dehydratase
NCU08868	CBNBSNCU00340_peak_2104	10.3434	4.17237	1576	hypothetical protein
NCU09160	CBNBSNCU00340_peak_1227	8.28632	3.93813	1577	HPP family protein
NCU03170	CBNBSNCU00340_peak_432	23.1629	5.70092	1578	molybdopterin-converting factor subunit 2
NCU17064	CBNBSNCU00340_peak_2703	43.4152	8.10711	1578	5-nitroimidazole antibiotic resistance protein
NCU00586	CBNBSNCU00340_peak_697	35.1767	7.94453	1579	"non-anchored cell wall protein-6, ncw-6"
NCU06418	CBNBSNCU00340_peak_1311	33.5459	7.56874	1579	ATP-dependent RNA helicase dbp-8
NCU08274	CBNBSNCU00340_peak_1839	34.4365	7.8689	1579	hypothetical protein
NCU08478	CBNBSNCU00340_peak_1150	38.6306	8.50639	1580	hypothetical protein
NCU10020	CBNBSNCU00340_peak_3083	21.9262	5.85969	1583	methionine synthase
NCU05251	CBNBSNCU00340_peak_2080	13.8625	4.61914	1584	DNA-directed RNA polymerase I polypeptide
NCU08919	CBNBSNCU00340_peak_2162	12.9292	4.44147	1584	SNF2 family helicase/ATPase
NCU05513	CBNBSNCU00340_peak_2820	15.073	4.58289	1584	hypothetical protein
NCU05340	CBNBSNCU00340_peak_966	26.0267	6.68136	1590	alkanesulfonate monooxygenase
NCU06197	CBNBSNCU00340_peak_1361	27.2703	5.42647	1590	hypothetical protein
NCU07731	CBNBSNCU00340_peak_1789	20.5861	5.58687	1591	hypothetical protein
NCU02103	CBNBSNCU00340_peak_123	23.7906	5.73221	1592	DNA-directed RNA polymerase II largest subunit
NCU03690	CBNBSNCU00340_peak_2275	20.9546	5.11744	1592	importin beta-2 subunit
NCU02873	CBNBSNCU00340_peak_794	13.1199	3.78858	1594	hypothetical protein
NCU07811	CBNBSNCU00340_peak_2122	41.5401	8.28547	1595	hypothetical protein
NCU06551	CBNBSNCU00340_peak_1751	15.5553	5.22429	1596	hypothetical protein
NCU02190	CBNBSNCU00340_peak_3220	25.4399	5.69502	1596	oxysterol binding protein
NCU02503	CBNBSNCU00340_peak_238	19.2985	5.48537	1598	hypothetical protein
NCU08628	CBNBSNCU00340_peak_861	17.0017	4.59569	1598	hypothetical protein
NCU01242	CBNBSNCU00340_peak_2403	12.4749	4.24482	1598	G2/mitotic-specific cyclin
NCU07944	CBNBSNCU00340_peak_1731	15.8225	4.5109	1600	deoxyribose-phosphate aldolase
NCU11309	CBNBSNCU00340_peak_2192	18.4546	5.07818	1600	integral membrane protein
NCU01238	CBNBSNCU00340_peak_2399	13.25	3.97551	1602	PHD transcription factor
NCU01828	CBNBSNCU00340_peak_1043	18.8348	5.05634	1603	hypothetical protein
NCU06583	CBNBSNCU00340_peak_1757	21.0171	5.78664	1603	hypothetical protein
NCU06788	CBNBSNCU00340_peak_1013	23.0169	5.61201	1604	hypothetical protein
NCU02192	CBNBSNCU00340_peak_3218	13.0036	4.22113	1605	hypothetical protein
NCU05641	CBNBSNCU00340_peak_2778	17.9103	5.17128	1606	hypothetical protein
NCU07585	CBNBSNCU00340_peak_1643	32.1498	7.61219	1607	siroheme synthase
NCU09948	CBNBSNCU00340_peak_2643	11.6649	4.41923	1609	hypothetical protein
NCU03881	CBNBSNCU00340_peak_2849	36.4305	7.40077	1609	hypothetical protein
NCU04003	CBNBSNCU00340_peak_2875	30.216	6.53926	1610	ERP1 protein
NCU01345	CBNBSNCU00340_peak_2439	16.2155	4.79226	1611	ascospore lethal-1
NCU05578	CBNBSNCU00340_peak_2797	28.3418	6.53965	1612	hypothetical protein
NCU02738	CBNBSNCU00340_peak_342	40.447	7.97545	1613	"peflin-1, pef-1"
NCU08743	CBNBSNCU00340_peak_1179	34.9419	6.45105	1613	inorganic phosphate transporter
NCU05494	CBNBSNCU00340_peak_2830	11.0575	3.8341	1614	hypothetical protein
NCU07578	CBNBSNCU00340_peak_1566	32.9907	7.24677	1615	peroxisomal adenine nucleotide transporter 1
NCU08263	CBNBSNCU00340_peak_1604	9.14592	3.99366	1615	hypothetical protein
NCU05229	CBNBSNCU00340_peak_2086	27.3836	6.37787	1618	hypothetical protein
NCU08508	CBNBSNCU00340_peak_1146	15.774	3.77581	1620	hypothetical protein
NCU04795	CBNBSNCU00340_peak_2741	42.4679	8.78674	1620	hypothetical protein
NCU10715	CBNBSNCU00340_peak_3130	19.0711	5.04751	1620	oxysterol binding protein
NCU07246	CBNBSNCU00340_peak_2647	34.3342	7.95944	1622	Swi4
NCU05563	CBNBSNCU00340_peak_2804	26.3376	4.96623	1622	hypothetical protein
NCU03960	CBNBSNCU00340_peak_2861	11.0933	3.96356	1623	hypothetical protein
NCU01196	CBNBSNCU00340_peak_2389	49.4282	9.02958	1624	hypothetical protein
NCU05837	CBNBSNCU00340_peak_3273	24.4033	6.46905	1627	vacuolar protein sorting-associated protein 13a
NCU07952	CBNBSNCU00340_peak_1728	9.73083	3.44606	1629	C2H2 type zinc finger domain-containing protein
NCU01397	CBNBSNCU00340_peak_2456	28.0146	5.53214	1629	hypothetical protein
NCU00949	CBNBSNCU00340_peak_573	18.3799	5.28507	1631	hypothetical protein
NCU04512	CBNBSNCU00340_peak_1879	13.0155	4.84437	1632	hypothetical protein
NCU07230	CBNBSNCU00340_peak_2653	18.9748	5.47632	1632	hypothetical protein
NCU00532	CBNBSNCU00340_peak_719	45.4642	9.27715	1633	hypothetical protein
NCU01810	CBNBSNCU00340_peak_1052	12.3442	4.50151	1634	hypothetical protein
NCU03161	CBNBSNCU00340_peak_431	17.3737	4.76446	1636	hypothetical protein
NCU04954	CBNBSNCU00340_peak_1712	32.8331	5.59585	1636	hypothetical protein
NCU00319	CBNBSNCU00340_peak_1486	12.3788	4.4412	1637	hypothetical protein
NCU01051	CBNBSNCU00340_peak_2342	23.7201	6.10936	1638	hypothetical protein
NCU01713	CBNBSNCU00340_peak_1084	41.0922	8.01931	1639	tubulin-folding cofactor B
NCU09676	CBNBSNCU00340_peak_2182	25.629	6.12792	1639	hypothetical protein
NCU00247	CBNBSNCU00340_peak_1462	14.5441	4.76414	1640	hypothetical protein
NCU04414	CBNBSNCU00340_peak_1907	29.4398	6.9192	1640	hypothetical protein
NCU17060	CBNBSNCU00340_peak_2696	24.2919	5.67061	1640	DRAP deaminase
NCU11363	CBNBSNCU00340_peak_1651	21.5313	4.83207	1641	FAD binding domain-containing protein
NCU04360	CBNBSNCU00340_peak_1920	10.3613	3.82685	1644	hypothetical protein
NCU09094	CBNBSNCU00340_peak_83	12.609	4.60686	1645	pre-rRNA-processing protein ipi-1
NCU09328	CBNBSNCU00340_peak_375	27.8104	5.92218	1645	hypothetical protein
NCU08866	CBNBSNCU00340_peak_2106	10.0343	4.05237	1646	hypothetical protein
NCU05378	CBNBSNCU00340_peak_972	23.4821	5.86719	1647	hypothetical protein
NCU09012	CBNBSNCU00340_peak_1564	14.7432	4.28071	1649	hypothetical protein
NCU01587	CBNBSNCU00340_peak_1111	19.2532	4.03854	1651	cofilin
NCU16770	CBNBSNCU00340_peak_1780	15.2403	5.50052	1651	hypothetical protein
NCU07824	CBNBSNCU00340_peak_1275	9.87259	3.7575	1652	MDM10
NCU09445	CBNBSNCU00340_peak_3005	53.9641	9.87361	1652	Cip2
NCU06834	CBNBSNCU00340_peak_1006	11.7236	4.20462	1653	ADAM protease ADM-B
NCU04297	CBNBSNCU00340_peak_2608	31.8309	7.53825	1654	hypothetical protein
NCU06881	CBNBSNCU00340_peak_3037	12.9526	4.65395	1654	succinyl-CoA:3-ketoacid-coenzyme A transferase subunit A
NCU10039	CBNBSNCU00340_peak_2098	20.5861	5.62503	1655	hypothetical protein
NCU01039	CBNBSNCU00340_peak_2338	14.2597	4.95673	1656	hypothetical protein
NCU02399	CBNBSNCU00340_peak_3168	30.9177	6.55458	1656	hypothetical protein
NCU00781	CBNBSNCU00340_peak_631	8.78926	3.77434	1657	hypothetical protein
NCU07420	CBNBSNCU00340_peak_535	13.1229	4.59139	1658	eIF4A
NCU02329	CBNBSNCU00340_peak_3188	9.33074	3.68639	1658	hypothetical protein
NCU16363	CBNBSNCU00340_peak_249	13.5967	4.6847	1660	hypothetical protein
NCU08511	CBNBSNCU00340_peak_1143	30.5768	7.02965	1663	arrestin domain conatining protein
NCU07378	CBNBSNCU00340_peak_547	31.7705	6.36626	1664	serine threonine protein kinase
NCU06055	CBNBSNCU00340_peak_3145	47.7999	9.03247	1664	extracellular alkaline protease
NCU02702	CBNBSNCU00340_peak_333	21.2358	5.97631	1665	glucokinase
NCU06987	CBNBSNCU00340_peak_2022	11.7075	4.32965	1668	hypothetical protein
NCU06228	CBNBSNCU00340_peak_1371	15.0906	4.68954	1669	hypothetical protein
NCU00617	CBNBSNCU00340_peak_682	12.4078	4.5972	1670	phosducin family protein
NCU01188	CBNBSNCU00340_peak_2385	27.4914	5.23511	1676	ubiquitin conjugating enzyme
NCU04784	CBNBSNCU00340_peak_2739	22.7419	6.23561	1676	hypothetical protein
NCU00922	CBNBSNCU00340_peak_579	8.64819	3.15456	1678	hypothetical protein
NCU05505	CBNBSNCU00340_peak_2823	16.7243	4.63352	1679	hypothetical protein
NCU08801	CBNBSNCU00340_peak_2054	30.064	7.28755	1680	hypothetical protein
NCU02351	CBNBSNCU00340_peak_3182	8.19032	3.79505	1682	chitin synthase regulator 3
NCU08494	CBNBSNCU00340_peak_1148	42.6708	7.56826	1683	hypothetical protein
NCU00349	CBNBSNCU00340_peak_1505	31.8819	6.71098	1683	hypothetical protein
NCU04319	CBNBSNCU00340_peak_2615	42.5336	8.40327	1684	spindle pole body component
NCU03792	CBNBSNCU00340_peak_2306	8.81894	3.82287	1686	inositol polyphosphate phosphatase
NCU01245	CBNBSNCU00340_peak_2406	27.0174	6.33468	1686	hypothetical protein
NCU02034	CBNBSNCU00340_peak_150	52.8713	10.3546	1688	RIP defective
NCU02719	CBNBSNCU00340_peak_335	50.3235	9.28105	1688	hypothetical protein
NCU06386	CBNBSNCU00340_peak_1844	20.3831	5.46735	1689	dolichyl-phosphate beta-glucosyltransferase
NCU09957	CBNBSNCU00340_peak_2644	38.7039	8.61523	1693	hypothetical protein
NCU04689	CBNBSNCU00340_peak_2702	29.3583	6.17894	1693	hypothetical protein
NCU00787	CBNBSNCU00340_peak_628	26.3517	6.39552	1696	hypothetical protein
NCU08830	CBNBSNCU00340_peak_2045	33.6197	7.68449	1698	hypothetical protein
NCU06320	CBNBSNCU00340_peak_1864	20.8634	6.09071	1699	hypothetical protein
NCU01754	CBNBSNCU00340_peak_1076	14.3288	3.96029	1700	alcohol dehydrogenase I
NCU04815	CBNBSNCU00340_peak_2750	28.7624	5.57176	1700	lactoylglutathione lyase
NCU09161	CBNBSNCU00340_peak_1227	8.28632	3.93813	1702	translation factor pelota
NCU06342	CBNBSNCU00340_peak_1856	27.3467	6.5163	1702	phospholipase D
NCU08946	CBNBSNCU00340_peak_2628	46.7274	9.11633	1702	hypothetical protein
NCU05653	CBNBSNCU00340_peak_2774	27.2703	5.43967	1702	carbonic anhydrase
NCU00078	CBNBSNCU00340_peak_1418	13.7664	4.33543	1705	hypothetical protein
NCU05567	CBNBSNCU00340_peak_2802	25.0736	6.06711	1706	hypothetical protein
NCU05350	CBNBSNCU00340_peak_968	12.3568	4.16962	1707	hypothetical protein
NCU07280	CBNBSNCU00340_peak_2002	54.0258	10.0659	1708	serine/threonine-protein kinase gad8
NCU00486	CBNBSNCU00340_peak_1549	11.5588	3.88422	1709	hypothetical protein
NCU07711	CBNBSNCU00340_peak_1796	7.28386	2.84843	1709	vacuolar calcium ion transporter/H(+) exchanger
NCU09562	CBNBSNCU00340_peak_3062	17.0948	4.41911	1711	hypothetical protein
NCU03470	CBNBSNCU00340_peak_909	23.3803	5.22044	1712	hypothetical protein
NCU10036	CBNBSNCU00340_peak_1139	13.8698	4.06137	1713	golgi matrix protein
NCU16823	CBNBSNCU00340_peak_1940	32.1206	7.15137	1713	hypothetical protein
NCU07497	CBNBSNCU00340_peak_32	9.33074	3.65191	1714	hypothetical protein
NCU00389	CBNBSNCU00340_peak_1515	19.8119	5.79675	1714	developmentally regulated GTP-binding protein 1
NCU16333	CBNBSNCU00340_peak_124	6.17705	2.82434	1715	hypothetical protein
NCU02956	CBNBSNCU00340_peak_768	23.0169	5.69787	1717	aspartic proteinase
NCU06760	CBNBSNCU00340_peak_1023	9.88584	2.98423	1717	pyruvate dehydrogenase kinase
NCU09090	CBNBSNCU00340_peak_82	22.8773	5.12206	1718	phosphopantothenate-cysteine ligase
NCU00052	CBNBSNCU00340_peak_1411	20.5252	5.89887	1718	alpha-methylacyl-CoA racemase
NCU08703	CBNBSNCU00340_peak_1164	34.9419	6.43674	1719	inorganic pyrophosphatase
NCU08722	CBNBSNCU00340_peak_1172	39.6445	7.99927	1720	hypothetical protein
NCU03807	CBNBSNCU00340_peak_2313	12.3007	4.33065	1720	hypothetical protein
NCU02759	CBNBSNCU00340_peak_348	47.6401	8.72059	1721	hypothetical protein
NCU03365	CBNBSNCU00340_peak_952	24.663	5.82419	1721	hypothetical protein
NCU07973	CBNBSNCU00340_peak_1720	43.6125	8.33507	1721	hypothetical protein
NCU04633	CBNBSNCU00340_peak_2209	19.5626	5.15719	1722	RING finger protein
NCU01866	CBNBSNCU00340_peak_205	45.225	8.43343	1723	lactonohydrolase
NCU06113	CBNBSNCU00340_peak_3122	26.3272	5.56016	1724	ammecr1 family protein
NCU10810	CBNBSNCU00340_peak_477	25.4747	5.67205	1726	mRNA splicing protein
NCU16846	CBNBSNCU00340_peak_1984	20.5195	4.84839	1726	hypothetical protein
NCU01865	CBNBSNCU00340_peak_206	11.8256	4.17252	1727	hypothetical protein
NCU02800	CBNBSNCU00340_peak_811	26.1543	6.05847	1728	arsenite resistance protein Ars2
NCU03809	CBNBSNCU00340_peak_2315	28.4774	6.53874	1728	hypothetical protein
NCU16806	CBNBSNCU00340_peak_1886	34.9419	6.46536	1729	hypothetical protein
NCU05681	CBNBSNCU00340_peak_1246	43.8737	8.95847	1732	hypothetical protein
NCU03850	CBNBSNCU00340_peak_2841	29.4015	5.86436	1735	ureidoglycolate hydrolase
NCU08396	CBNBSNCU00340_peak_3067	48.4726	9.38539	1736	hypothetical protein
NCU09296	CBNBSNCU00340_peak_2990	12.2112	4.37028	1738	hypothetical protein
NCU04950	CBNBSNCU00340_peak_1711	29.4457	6.6848	1740	hypothetical protein
NCU07700	CBNBSNCU00340_peak_1807	33.2994	7.24485	1741	"colonial temperature-sensitive-3, cot-3"
NCU07516	CBNBSNCU00340_peak_1584	33.0564	7.60231	1743	RING finger membrane protein
NCU06984	CBNBSNCU00340_peak_2019	35.3316	7.61919	1743	hypothetical protein
NCU02580	CBNBSNCU00340_peak_272	44.2676	8.01544	1744	fumarate reductase Osm1
NCU07922	CBNBSNCU00340_peak_1736	18.5244	5.0797	1744	elongation factor 3
NCU05805	CBNBSNCU00340_peak_3262	14.3288	4.49587	1745	serine hydroxymethyltransferase
NCU16311	CBNBSNCU00340_peak_28	37.6086	7.83672	1746	hypothetical protein
NCU03319	CBNBSNCU00340_peak_482	35.8964	7.3354	1746	COPII-coated vesicle protein SurF4/Erv29
NCU04051	CBNBSNCU00340_peak_2890	20.1133	5.49224	1752	GCN20
NCU02552	CBNBSNCU00340_peak_261	17.6462	4.81795	1754	RING-8 protein
NCU03313	CBNBSNCU00340_peak_479	33.1829	7.31789	1754	hypothetical protein
NCU00642	CBNBSNCU00340_peak_673	16.2331	5.13663	1755	beta-galactosidase
NCU11402	CBNBSNCU00340_peak_844	12.8856	4.4286	1755	DUF786 family protein
NCU01335	CBNBSNCU00340_peak_2436	33.425	7.87358	1758	cell division control protein 15
NCU03901	CBNBSNCU00340_peak_2854	14.0239	3.97597	1759	peroxisomal membrane anchor protein
NCU03360	CBNBSNCU00340_peak_956	16.4504	4.94711	1762	hypothetical protein
NCU09074	CBNBSNCU00340_peak_75	18.442	4.63375	1764	hypothetical protein
NCU06612	CBNBSNCU00340_peak_1768	11.6225	4.38521	1765	hypothetical protein
NCU04269	CBNBSNCU00340_peak_2594	19.2048	4.4256	1765	aspartyl proteinase
NCU04803	CBNBSNCU00340_peak_2745	36.7135	6.99068	1767	2-nitropropane dioxygenase family oxidoreductase
NCU07542	CBNBSNCU00340_peak_1577	10.5459	3.5679	1768	"rad23-like, rad23"
NCU02582	CBNBSNCU00340_peak_274	9.92553	3.89924	1769	sorbose-resistant-4
NCU08799	CBNBSNCU00340_peak_2054	30.064	7.28755	1770	hypothetical protein
NCU00513	CBNBSNCU00340_peak_726	40.8316	8.79654	1771	phosphotransferase enzyme family domain-containing protein
NCU04735	CBNBSNCU00340_peak_2722	14.4978	4.76985	1771	hypothetical protein
NCU02153	CBNBSNCU00340_peak_106	37.6544	8.24081	1772	hypothetical protein
NCU01281	CBNBSNCU00340_peak_2418	22.6561	5.13458	1773	hypothetical protein
NCU04806	CBNBSNCU00340_peak_2747	38.7491	7.71196	1774	hypothetical protein
NCU00101	CBNBSNCU00340_peak_1422	31.7705	6.44432	1775	pbn-1
NCU09455	CBNBSNCU00340_peak_3009	22.9114	6.01045	1775	hypothetical protein
NCU06986	CBNBSNCU00340_peak_2020	27.0985	5.6211	1776	DUF221 domain-containing protein
NCU12036	CBNBSNCU00340_peak_3056	40.4757	7.75843	1776	hypothetical protein
NCU00783	CBNBSNCU00340_peak_629	24.5711	5.8009	1777	hypothetical protein
NCU07981	CBNBSNCU00340_peak_1932	21.5735	5.47939	1777	hypothetical protein
NCU08822	CBNBSNCU00340_peak_2047	13.8748	4.81323	1777	hypothetical protein
NCU09078	CBNBSNCU00340_peak_76	15.9758	4.81307	1780	hypothetical protein
NCU04225	CBNBSNCU00340_peak_2577	11.9445	4.2704	1783	60S ribosomal protein L20
NCU05276	CBNBSNCU00340_peak_2074	19.5137	4.97694	1784	Yip1 domain family
NCU08341	CBNBSNCU00340_peak_511	48.0944	8.39267	1785	CLAP1
NCU07712	CBNBSNCU00340_peak_1795	9.21109	3.47835	1785	ATP-dependent RNA helicase dbp-10
NCU01431	CBNBSNCU00340_peak_2529	30.216	6.55644	1785	cytokinesis protein sepA
NCU00857	CBNBSNCU00340_peak_600	47.6272	8.98216	1786	hypothetical protein
NCU10897	CBNBSNCU00340_peak_1842	11.9459	3.65649	1786	hypothetical protein
NCU04444	CBNBSNCU00340_peak_1897	36.4998	6.35108	1787	hypothetical protein
NCU03113	CBNBSNCU00340_peak_417	23.7446	6.02569	1790	SH3 domain-containing protein
NCU00225	CBNBSNCU00340_peak_1453	41.0166	8.29613	1790	hypothetical protein
NCU08445	CBNBSNCU00340_peak_1191	17.7691	5.62267	1792	misfolded glycoproteins degradation protein Yos9
NCU03418	CBNBSNCU00340_peak_935	14.6475	4.45124	1793	hypothetical protein
NCU06970	CBNBSNCU00340_peak_2011	12.5343	4.20152	1793	ribose-phosphate pyrophosphokinase II
NCU01036	CBNBSNCU00340_peak_2336	11.6453	4.23724	1794	DUF907 domain-containing protein
NCU01869	CBNBSNCU00340_peak_204	30.216	6.59078	1796	hypothetical protein
NCU04273	CBNBSNCU00340_peak_2597	12.6725	4.40366	1796	RNA-binding protein
NCU12125	CBNBSNCU00340_peak_2909	31.1744	5.61533	1797	hypothetical protein
NCU05556	CBNBSNCU00340_peak_2808	30.9639	6.079	1798	hypothetical protein
NCU06139	CBNBSNCU00340_peak_3112	46.7274	9.17568	1799	hypothetical protein
NCU04362	CBNBSNCU00340_peak_1920	10.3613	3.82685	1800	pre-mRNA-splicing factor cwc-26
NCU05561	CBNBSNCU00340_peak_2805	41.759	7.60009	1800	copper metallothionein
NCU00425	CBNBSNCU00340_peak_1527	17.4089	5.26297	1801	hypothetical protein
NCU07795	CBNBSNCU00340_peak_2128	32.4794	7.73088	1802	DUF1665 domain-containing protein
NCU00814	CBNBSNCU00340_peak_618	32.7224	6.89986	1803	hypothetical protein
NCU03692	CBNBSNCU00340_peak_2275	20.9546	5.11744	1805	methyltransferase
NCU05491	CBNBSNCU00340_peak_2833	25.0653	5.7854	1807	hypothetical protein
NCU06530	CBNBSNCU00340_peak_1746	11.7923	4.32892	1809	palmitoyl-protein thioesterase
NCU09003	CBNBSNCU00340_peak_1558	19.2083	5.19125	1811	hypothetical protein
NCU04122	CBNBSNCU00340_peak_2544	12.6095	4.42303	1811	malate dehydrogenase
NCU10404	CBNBSNCU00340_peak_1102	12.4994	4.58345	1812	hypothetical protein
NCU04229	CBNBSNCU00340_peak_2578	16.0927	4.97633	1814	DNA excision repair protein
NCU03804	CBNBSNCU00340_peak_2311	17.4089	4.69596	1815	serine/threonine-protein phosphatase 2B catalytic subunit
NCU05081	CBNBSNCU00340_peak_2962	19.453	5.68706	1816	hypothetical protein
NCU02209	CBNBSNCU00340_peak_3215	16.6477	4.96506	1816	delta-12 fatty acid desaturase
NCU02837	CBNBSNCU00340_peak_806	36.7135	6.94385	1817	pre-mRNA branch site protein p14
NCU10037	CBNBSNCU00340_peak_2099	27.2121	6.90769	1818	hypothetical protein
NCU07324	CBNBSNCU00340_peak_1986	23.0169	5.64635	1819	"conidiation-13, con-13"
NCU08093	CBNBSNCU00340_peak_16	9.59601	3.71167	1821	hypothetical protein
NCU06086	CBNBSNCU00340_peak_3133	13.5577	4.49243	1825	regulatory protein suaprga1
NCU00812	CBNBSNCU00340_peak_619	12.8993	4.54201	1826	exosome complex exonuclease RRP41
NCU07905	CBNBSNCU00340_peak_1739	12.6747	4.14869	1827	hypothetical protein
NCU11347	CBNBSNCU00340_peak_2006	33.3001	7.81305	1827	hypothetical protein
NCU04251	CBNBSNCU00340_peak_2588	12.1052	3.83613	1827	chitin synthase 3
NCU07201	CBNBSNCU00340_peak_2662	11.4466	3.70363	1829	hypothetical protein
NCU02876	CBNBSNCU00340_peak_793	9.4692	3.81597	1832	hypothetical protein
NCU04671	CBNBSNCU00340_peak_2191	17.9896	5.13482	1832	hypothetical protein
NCU09434	CBNBSNCU00340_peak_2999	23.168	5.42965	1832	"meiotic silencing suppressor 2, sms-2"
NCU07974	CBNBSNCU00340_peak_1927	9.3966	3.83158	1834	endoglucanase B
NCU08744	CBNBSNCU00340_peak_1179	34.9419	6.45105	1835	hypothetical protein
NCU04770	CBNBSNCU00340_peak_2735	19.7456	5.25998	1836	TATA-binding protein
NCU09064	CBNBSNCU00340_peak_70	9.27935	3.60296	1840	hypothetical protein
NCU03276	CBNBSNCU00340_peak_468	23.1056	5.70351	1841	"bem46 family protein, bem46"
NCU11237	CBNBSNCU00340_peak_245	41.356	7.82712	1843	prenylated Rab acceptor 1
NCU00701	CBNBSNCU00340_peak_654	26.7583	6.58559	1844	lysozyme
NCU05781	CBNBSNCU00340_peak_3256	7.15502	3.3328	1844	mitotic spindle checkpoint component MAD2
NCU09240	CBNBSNCU00340_peak_843	43.1204	8.08469	1845	hypothetical protein
NCU00313	CBNBSNCU00340_peak_1483	8.44171	3.50997	1846	hypothetical protein
NCU05115	CBNBSNCU00340_peak_2952	30.0128	6.93619	1846	hypothetical protein
NCU03555	CBNBSNCU00340_peak_882	35.3459	7.49649	1849	hypothetical protein
NCU04563	CBNBSNCU00340_peak_2234	40.9722	8.6873	1849	hypothetical protein
NCU08368	CBNBSNCU00340_peak_503	40.1037	7.34972	1851	ribonuclease P complex subunit Pop2
NCU00803	CBNBSNCU00340_peak_623	15.0052	4.58173	1858	MFS transporter
NCU01760	CBNBSNCU00340_peak_1074	12.3007	4.33065	1858	pumilio-family RNA binding repeat protein
NCU06876	CBNBSNCU00340_peak_3036	35.7475	7.26227	1858	adenosine 5'-monophosphoramidase
NCU09131	CBNBSNCU00340_peak_493	15.8339	5.01649	1859	nucleolar protein 12
NCU05777	CBNBSNCU00340_peak_3255	43.5289	7.69314	1861	ubiquitin carboxyl-terminal hydrolase 14
NCU08705	CBNBSNCU00340_peak_1164	34.9419	6.43674	1863	hypothetical protein
NCU03269	CBNBSNCU00340_peak_465	36.0683	6.40256	1865	serine/threonine-protein phosphatase 2A activator 2
NCU11331	CBNBSNCU00340_peak_969	39.3945	7.70408	1866	hypothetical protein
NCU08900	CBNBSNCU00340_peak_2168	29.7935	6.89568	1867	FMN binding oxidoreductase
NCU16306	CBNBSNCU00340_peak_14	8.74951	3.82007	1868	hypothetical protein
NCU09887	CBNBSNCU00340_peak_555	16.9236	5.20137	1869	Drp1p
NCU06985	CBNBSNCU00340_peak_2020	27.0985	5.6211	1870	hypothetical protein
NCU01575	CBNBSNCU00340_peak_1113	11.7198	4.06659	1872	SNARE complex subunit
NCU03344	CBNBSNCU00340_peak_960	12.6366	4.29108	1874	hypothetical protein
NCU04419	CBNBSNCU00340_peak_1903	13.6613	4.78273	1874	2-oxoglutarate-dependent ethylene/succinate-forming enzyme
NCU05648	CBNBSNCU00340_peak_2777	19.0543	5.35792	1874	hypothetical protein
NCU09588	CBNBSNCU00340_peak_3053	44.8861	8.75908	1877	hypothetical protein
NCU03074	CBNBSNCU00340_peak_400	8.69872	3.55145	1882	hypothetical protein
NCU00363	CBNBSNCU00340_peak_1508	19.8483	5.32312	1882	hypothetical protein
NCU01410	CBNBSNCU00340_peak_2457	48.72	9.91442	1882	DUF1711 domain-containing protein
NCU10659	CBNBSNCU00340_peak_2178	16.5941	5.24656	1884	hypothetical protein
NCU01717	CBNBSNCU00340_peak_1082	52.7864	10.0861	1886	hypothetical protein
NCU04137	CBNBSNCU00340_peak_2550	17.779	5.39372	1886	vacuolar protein sorting-associated protein Vps5
NCU05137	CBNBSNCU00340_peak_2946	19.0543	5.43424	1887	"non-anchored cell wall protein-1, ncw-1"
NCU07289	CBNBSNCU00340_peak_2000	39.4218	7.19278	1888	transcription initiation factor IIB
NCU01201	CBNBSNCU00340_peak_2390	14.7999	4.71335	1889	trm-112
NCU00711	CBNBSNCU00340_peak_651	27.2703	5.45288	1890	multidrug resistance protein fnx1
NCU11027	CBNBSNCU00340_peak_2417	12.7941	4.04032	1890	zinc metalloprotease
NCU03791	CBNBSNCU00340_peak_2306	8.81894	3.82287	1892	hypothetical protein
NCU08047	CBNBSNCU00340_peak_1958	22.1085	5.97088	1895	hypothetical protein
NCU07252	CBNBSNCU00340_peak_2007	13.0036	4.22113	1898	hypothetical protein
NCU06624	CBNBSNCU00340_peak_1774	16.6468	5.1598	1899	CLC voltage-gated chloride channel protein
NCU01332	CBNBSNCU00340_peak_2434	19.9741	5.64179	1899	vacuolar membrane ATPase-3
NCU07785	CBNBSNCU00340_peak_2135	20.992	5.67278	1900	hypothetical protein
NCU09401	CBNBSNCU00340_peak_3074	47.1791	9.01428	1900	hypothetical protein
NCU00205	CBNBSNCU00340_peak_1447	9.71197	4.05462	1901	hypothetical protein
NCU02023	CBNBSNCU00340_peak_154	34.0064	8.08883	1902	MFS drug efflux pump
NCU06616	CBNBSNCU00340_peak_1769	9.72258	3.44376	1906	S-adenosylmethionine-dependent methyltransferase
NCU09239	CBNBSNCU00340_peak_845	19.1263	4.69099	1907	"proliferating cell nuclear antigen, pcn"
NCU08403	CBNBSNCU00340_peak_1183	17.4005	5.32437	1907	hypothetical protein
NCU06725	CBNBSNCU00340_peak_2501	32.3007	6.63806	1907	hypothetical protein
NCU07716	CBNBSNCU00340_peak_1793	39.0259	6.88033	1909	hypothetical protein
NCU00339	CBNBSNCU00340_peak_1499	36.5604	6.59415	1910	hypothetical protein
NCU01283	CBNBSNCU00340_peak_2420	10.8651	3.61777	1910	hypothetical protein
NCU03153	CBNBSNCU00340_peak_429	15.5714	4.14522	1911	hypothetical protein
NCU10005	CBNBSNCU00340_peak_1238	10.2291	4.13881	1911	hypothetical protein
NCU06999	CBNBSNCU00340_peak_2026	11.7476	4.09621	1911	hypothetical protein
NCU05184	CBNBSNCU00340_peak_2094	51.4384	10.1503	1911	hypothetical protein
NCU06893	CBNBSNCU00340_peak_3041	20.2066	5.77073	1911	hypothetical protein
NCU06419	CBNBSNCU00340_peak_1311	33.5459	7.56874	1912	MAP kinase kinase
NCU06627	CBNBSNCU00340_peak_1777	16.4497	4.82046	1913	hypothetical protein
NCU04156	CBNBSNCU00340_peak_2554	40.4662	8.16426	1916	"ergosterol-1, erg-1"
NCU08295	CBNBSNCU00340_peak_1833	17.0948	4.47634	1919	RNA-binding La domain-containing protein
NCU08662	CBNBSNCU00340_peak_1976	35.8774	6.88141	1920	hypothetical protein
NCU07460	CBNBSNCU00340_peak_57	42.6813	9.60633	1921	"protein kinase activator, mob-2b"
NCU09463	CBNBSNCU00340_peak_1207	26.3517	6.41474	1921	"leucine-6, leu-6"
NCU07786	CBNBSNCU00340_peak_2136	16.8445	4.25089	1922	hypothetical protein
NCU08091	CBNBSNCU00340_peak_15	41.827	8.66212	1924	hypothetical protein
[truncated: 952 more rows]
