# Supplementary material
Source: publisher figshare collection journal article supplement (https://gsajournals.figshare.com/articles/dataset/_/6146681)
Supplement: Supplementary file 2 [file 1]

**Table S2. Phenotype summary of the data presented in this paper for each mutant and wild-type.**

| Strain                                | Conidia<br>time to<br>germinate | Germling<br>Fusion | Hyphal<br>Fusion | Aerial<br>Hyphae<br>Height<br>(cm) | Growth<br>Rate<br>(cm/day) | Proto-<br>perithecia | Female<br>Fertile | Male<br>Fertile | Ascospore<br>Viable | Sensitive<br>to cell<br>wall<br>stress? |
|---------------------------------------|---------------------------------|--------------------|------------------|------------------------------------|----------------------------|----------------------|-------------------|-----------------|---------------------|-----------------------------------------|
| wild-type (FGSC 2489)                 | 2.5hrs                          | yes                | yes              | 5                                  | 8                          | yes                  | yes               | yes             | yes                 | no                                      |
| <i>Δadv-1</i>                         | 2.5hrs                          | no                 | no               | 2                                  | 5.5                        | yes                  | no                | yes             | yes                 | no                                      |
| <i>Δadv-1 (Ptef1-adv-1-v5)</i>        | 2.5hrs                          | yes                | yes              | 5                                  | 8                          | yes                  | yes               | yes             | yes                 | no                                      |
| <i>Δadv-1 (Ptef1-pp-1-v5)</i>         | 2.5hrs                          | no                 | no               | 2                                  | 5.5                        | yes                  | no                | yes             | yes                 | no                                      |
| <i>Δpp-1</i>                          | 3hrs                            | no                 | no               | 1.5                                | 2                          | no                   | no                | yes             | no                  | yes                                     |
| <i>Δpp-1 (Ptef1-adv-1-v5)</i>         | 2.5hrs                          | yes                | yes              | 5                                  | 8                          | yes                  | yes               | yes             | no                  | no                                      |
| <i>Δpp-1 (Ptef1-pp-1-v5)</i>          | 2.5hrs                          | yes                | yes              | 5                                  | 8                          | yes                  | yes               | yes             | no                  | no                                      |
| <i>Δpp-1 (Pccg1-pp-1-<i>gfp</i>)</i>  | 2.5hrs                          | yes                | yes              | 4                                  | 6.5                        | no                   | no                | partial         | no spores           | no                                      |
| <i>Δmak-1</i>                         | 3.5hrs                          | no                 | no               | 1                                  | 0.5                        | yes                  | no                | yes             | no                  | yes                                     |
| <i>Δmak-1 (Ptef1-adv-1-v5)</i>        | 3.5hrs                          | no                 | no               | 2                                  | 8                          | yes                  | no                | yes             | no                  | no                                      |
| <i>Δmak-1 (Ptef1-pp-1-v5)</i>         | 3.5hrs                          | no                 | no               | 1                                  | 0.5                        | yes                  | no                | yes             | no                  | yes                                     |
| <i>Δmak-2</i>                         | 3.5hrs                          | no                 | no               | 1                                  | 1.5                        | no                   | no                | yes             | no                  | yes                                     |
| <i>Δmak-2 (Ptef1-adv-1-v5)</i>        | 3.5hrs                          | no                 | no               | 1                                  | 1.5                        | no                   | no                | yes             | no                  | yes                                     |
| <i>Δmak-2 (Pccg1-pp-1-<i>gfp</i>)</i> | 3.5hrs                          | no                 | no               | 1                                  | 1.5                        | no                   | no                | yes             | no                  | no                                      |
