# Supplementary material
Source: publisher figshare collection journal article supplement (https://gsajournals.figshare.com/articles/dataset/_/6146681)
Supplement: Supplementary file 3 [file 1]

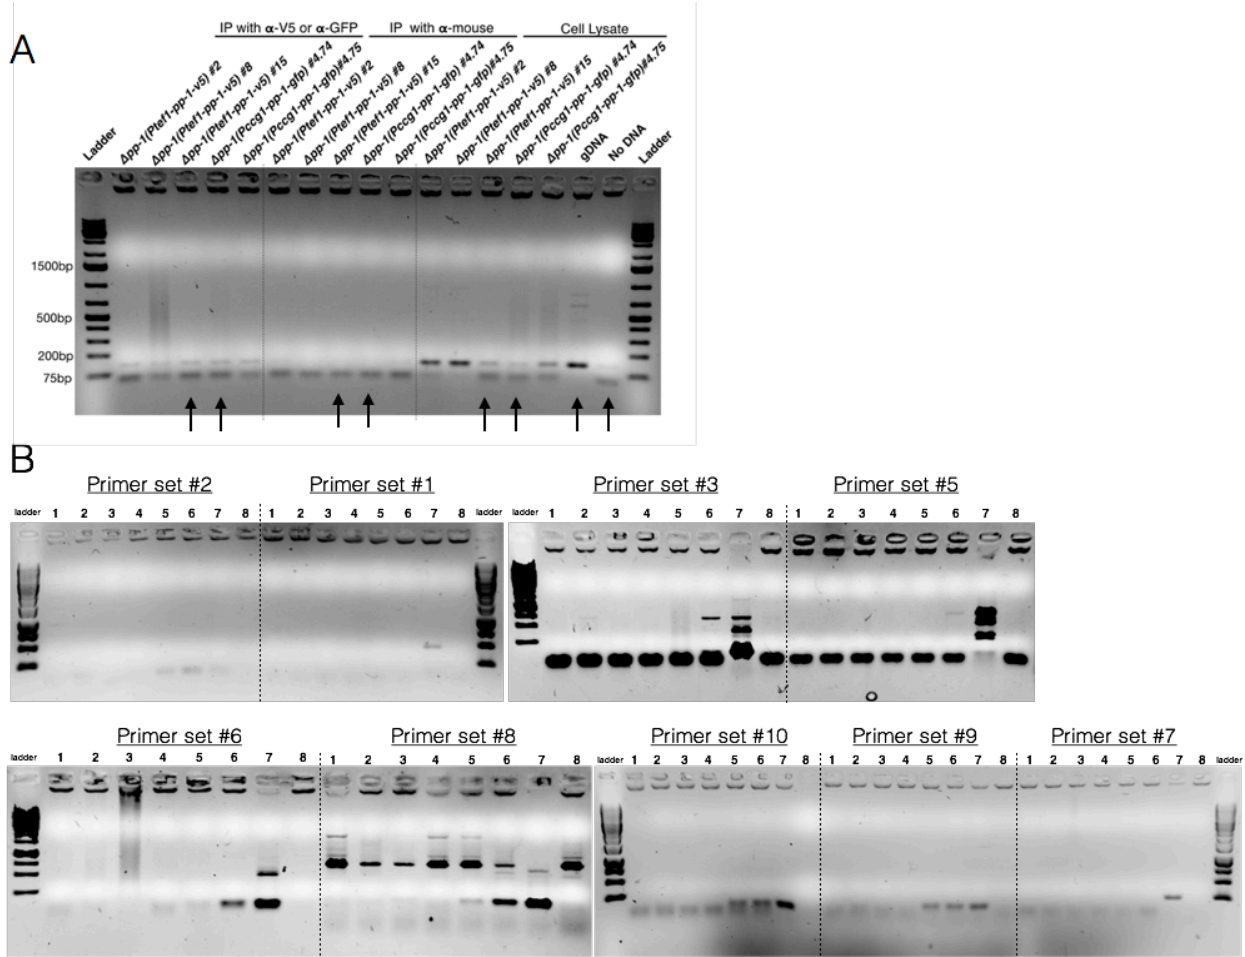

**Figure S5. Additional ChIP-PCR results.** (A) Positive results obtained with primer set #4. We tested three biological replicates of  $\Delta pp-1(Ptef1-pp-1-v5)$  and two biological replicates of  $\Delta pp-1(Pccg1-pp-1-gfp)$ . Arrows indicate PCR reactions that were repeated to generate Figure 6. (B) Inconclusive or negative ChIP-PCR results with nine different primer sets. Wells are numbered according to the DNA sample in that well:

- 1:  $\Delta pp-1(Ptef1-pp-1-v5)$  #15 (IP with  $\alpha$ -V5),
- 2:  $\Delta pp-1(Pccg1-pp-1-gfp)$  #4.74 (IP with  $\alpha$ -GFP),
- 3:  $\Delta pp-1(Ptef1-pp-1-v5)$  #15 (IP with  $\alpha$ -mouse),
- 4:  $\Delta pp-1(Pccg1-pp-1-gfp)$  #4.74 (IP with  $\alpha$ -mouse),
- 5:  $\Delta pp-1(Ptef1-pp-1-v5)$  #15 (cell lysate),
- 6:  $\Delta pp-1(Pccg1-pp-1-gfp)$  #4.74 (cell lysate),
- 7: wild-type gDNA,
- 8: No DNA.

Ladder is the ThermoFisher O'GeneRuler 1kb DNA Ladder. All PCR products are expected to be ~100-300bp. Bottom three ladder bands are at 250bp, 500bp, and 750bp.
