# Supplementary material
Source: publisher figshare collection journal article supplement (https://gsajournals.figshare.com/articles/dataset/_/6146681)
Supplement: Supplementary file 4 [file 1]

**Table S1. Genes that are differentially expressed in  $\Delta adv-1$  germlings and  $\Delta adv-1$  hyphae compared to wild-type.**

| Gene ID  | Annotation                           | Gene Name      | Circos Group                                       |
|----------|--------------------------------------|----------------|----------------------------------------------------|
| NCU02767 | Hyphal anastomosis-6 protein         | <i>ham-6</i>   | communication                                      |
| NCU02811 | hyphal anastomosis-8 protein         | <i>ham-8</i>   | communication                                      |
| NCU04487 | hypothetical protein                 |                | communication                                      |
| NCU04645 | DUF124 domain-containing protein     |                | communication                                      |
| NCU04732 | Hyphal anastomosis-11 protein        | <i>ham-11</i>  | communication                                      |
| NCU07192 | determinant of communication 2       | <i>doc-2</i>   | communication                                      |
| NCU05822 | hypothetical protein                 |                | signaling                                          |
| NCU02246 | hypothetical protein                 |                | adhesion                                           |
| NCU03132 | hypothetical protein                 |                | adhesion                                           |
| NCU05137 | non-anchored cell wall protein 1     |                | fungal cell wall remodeling                        |
| NCU09307 | late fusion defect 1                 | <i>lfd-1</i>   | fusion                                             |
| NCU09337 | plasma membrane fusion protein prm-1 | <i>prm-1</i>   | fusion                                             |
| NCU05712 | hypothetical protein                 |                | heterokaryon incompatibility                       |
| NCU01958 | mating-type protein A-1              | <i>mat A-1</i> | NA (heterokaryon incompatibility/development)      |
| NCU03600 | guanine triphosphate binding-5       | <i>esd-C</i>   | development                                        |
| NCU02988 | hypothetical protein                 |                | metabolism                                         |
| NCU05126 | hypothetical protein                 |                | metabolism                                         |
| NCU05132 | hypothetical protein                 |                | metabolism                                         |
| NCU05835 | hypothetical protein                 |                | metabolism                                         |
| NCU04997 | xylanase                             |                | plant cell wall degradation                        |
| NCU04496 | hypothetical protein                 |                | redox                                              |
| NCU08839 | hypothetical protein                 |                | DNA                                                |
| NCU03035 | hypothetical protein                 |                | hypothetical                                       |
| NCU09356 | hypothetical protein                 |                | hypothetical                                       |
| NCU12021 | hypothetical protein                 |                | hypothetical                                       |
| NCU00995 | hypothetical protein                 |                | hypothetical with signal peptide                   |
| NCU04169 | hypothetical protein                 |                | hypothetical with signal peptide                   |
| NCU09848 | hypothetical protein                 |                | hypothetical with signal peptide                   |
| NCU04542 | hypothetical protein                 |                | hypothetical, signal peptide, transmembrane domain |
| NCU05915 | hypothetical protein                 |                | hypothetical, signal peptide, transmembrane domain |
| NCU07798 | hypothetical protein                 |                | hypothetical with transmembrane domain             |
| NCU07802 | hypothetical protein                 |                | hypothetical with transmembrane domain             |
| NCU07804 | hypothetical protein                 |                | hypothetical with transmembrane domain             |
| NCU11172 | hypothetical protein                 |                | hypothetical with transmembrane domain             |
| NCU12067 | hypothetical protein                 |                | hypothetical with transmembrane domain             |
| NCU12068 | hypothetical protein                 |                | hypothetical with transmembrane domain             |
| NCU00994 | endothiapepsin                       |                | NA                                                 |
| NCU01066 | L-amino acid oxidase                 |                | NA                                                 |
| NCU06467 | hypothetical protein                 |                | NA                                                 |
