# Supplementary material
Source: publisher figshare collection journal article supplement (https://gsajournals.figshare.com/articles/dataset/_/6146681)
Supplement: Supplementary file 5 [file 1]

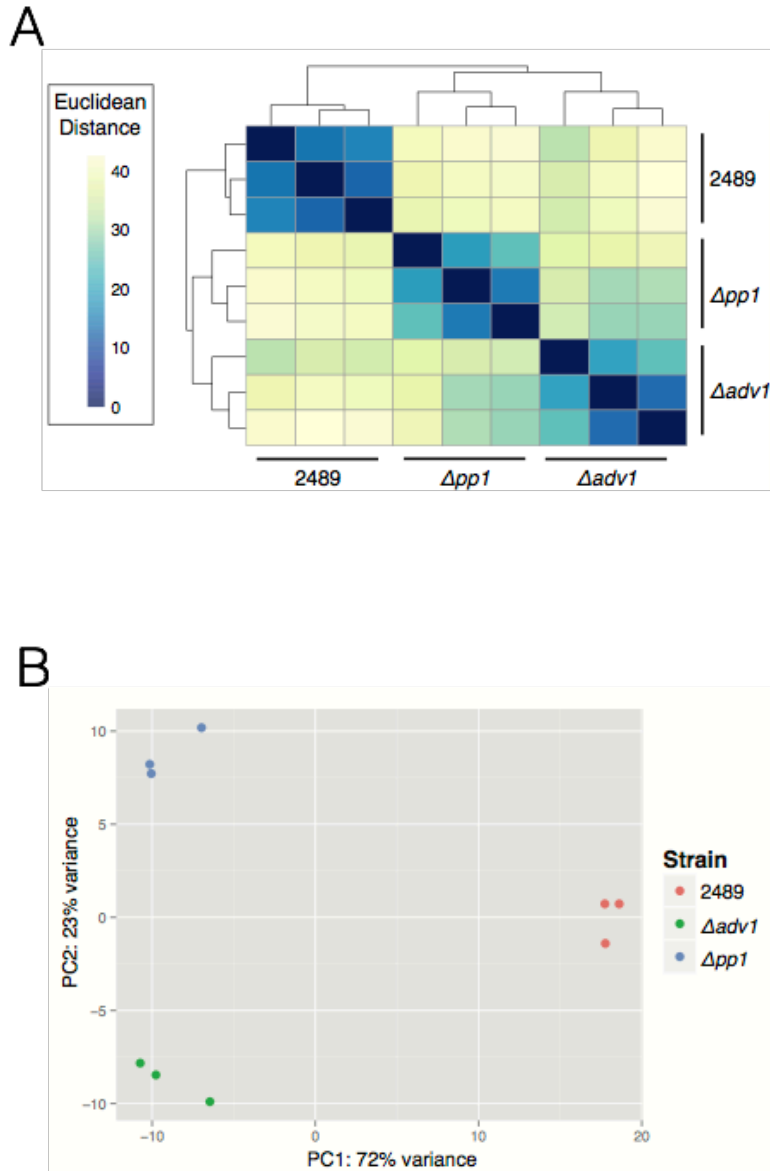

**Figure S1. Similarity of normalized counts between each RNAseq sample.**

Comparison between three replicate samples per strain. Two independent statistical methods showing the similarity between samples (A) Sample-to-sample distance plot shows the Euclidean distance between samples, and (B) PCA plot represents 95% of the total variance in the dataset shows distinct clusters for each strain. Both plots processed with DESeq2.
