# Supplementary material
Source: publisher figshare collection journal article supplement (https://gsajournals.figshare.com/articles/dataset/_/6146681)
Supplement: Supplementary file 6 [file 1]

A

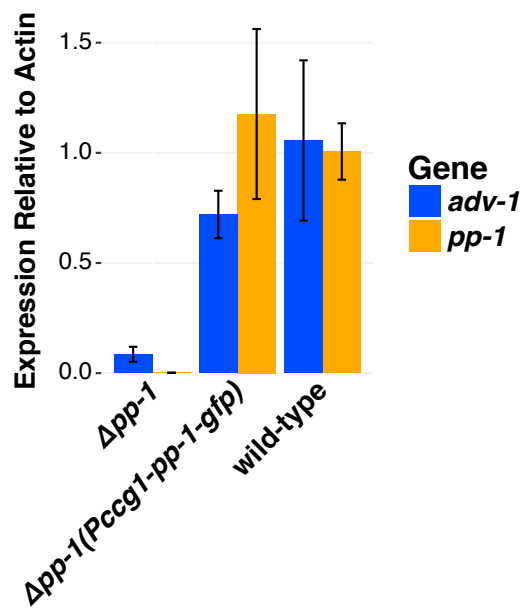

B

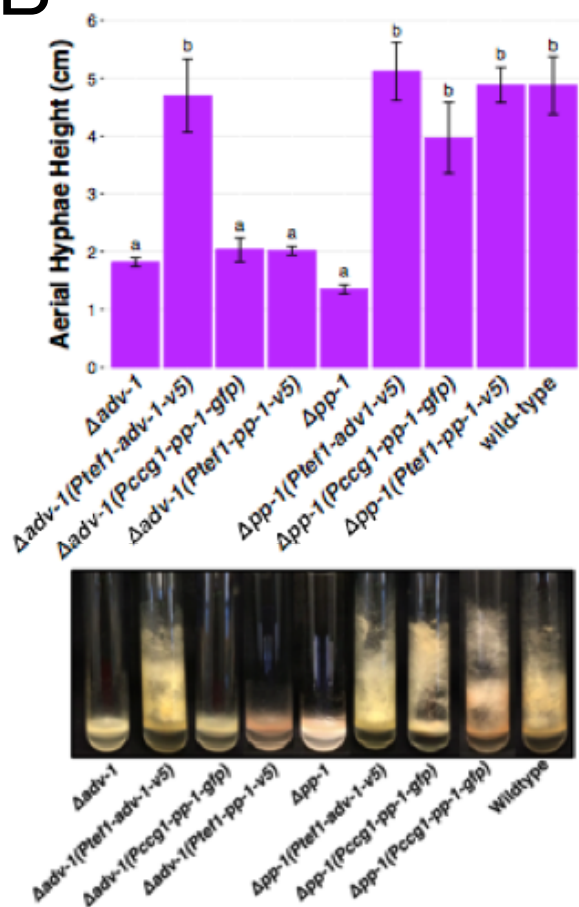

C

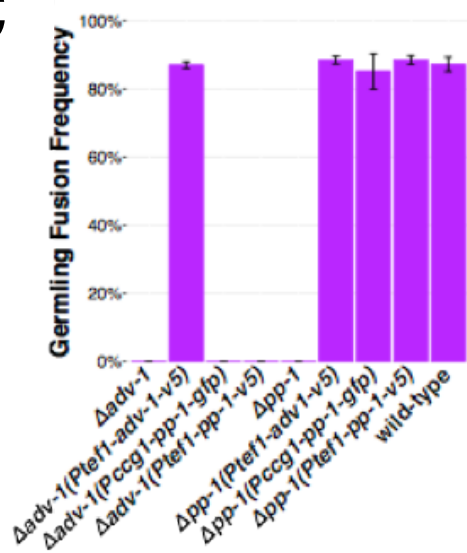

D

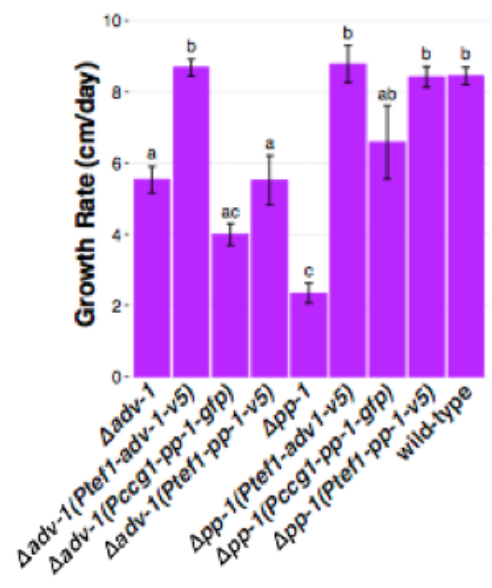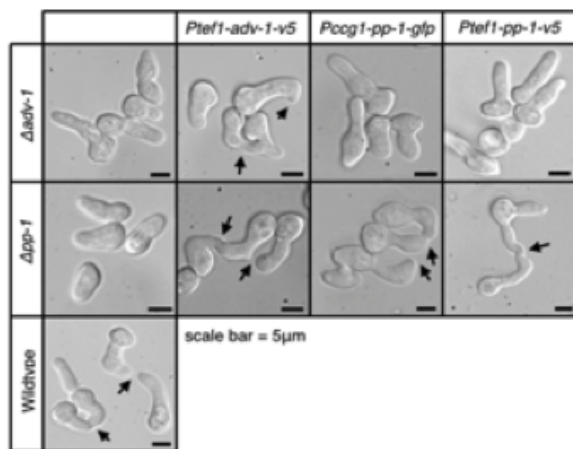

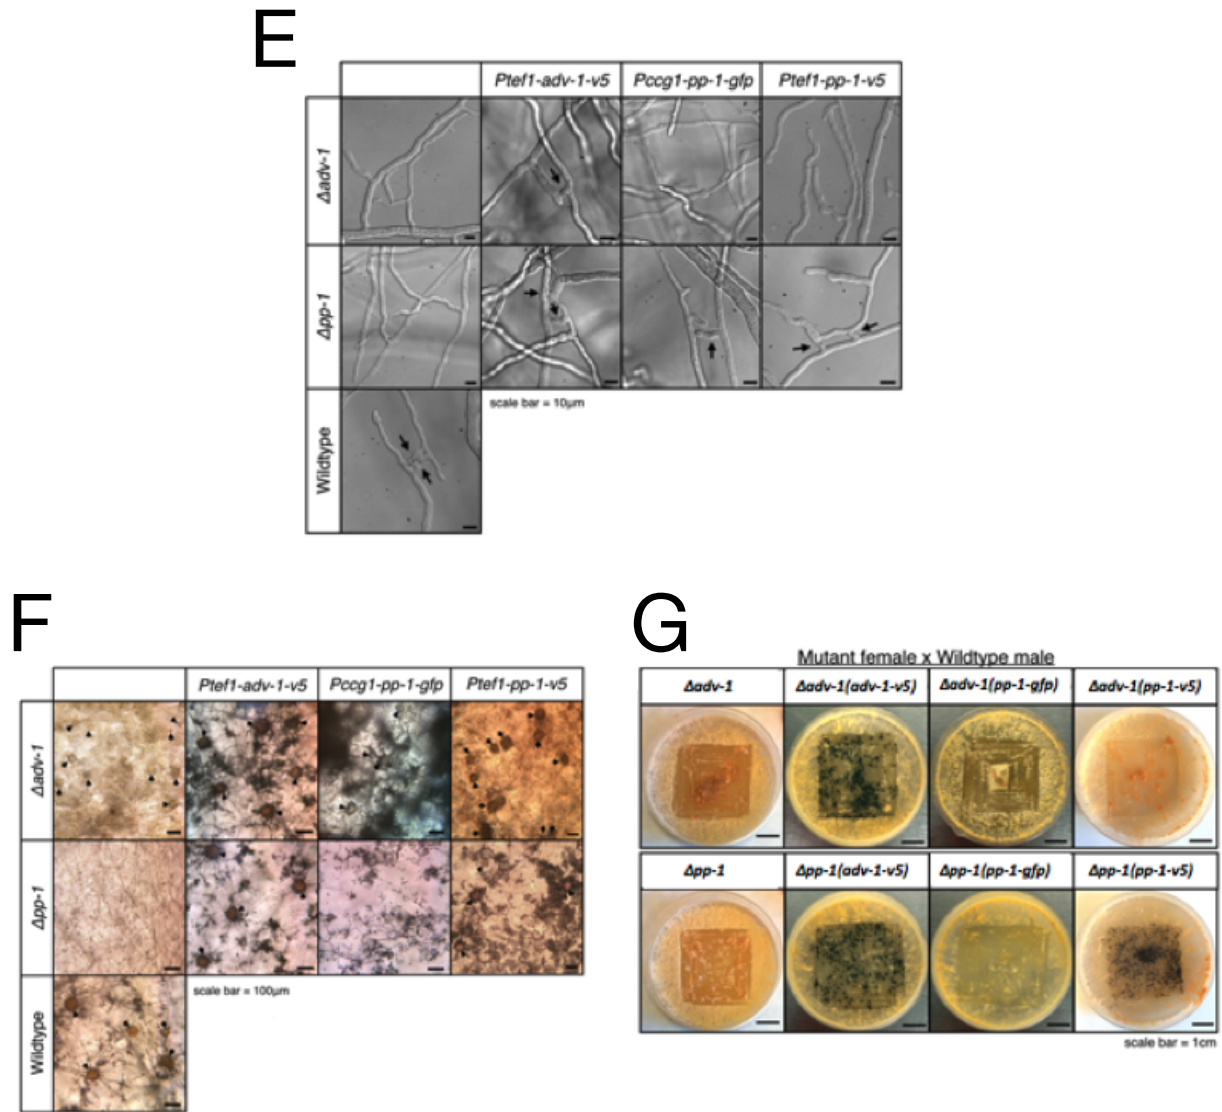

**Figure S3. Additional phenotypic data for  $\Delta adv-1$  and  $\Delta pp-1$  misexpression strains.**

(A) qRT-PCR data showing mRNA expression levels of *adv-1* and *pp-1* in  $\Delta pp-1$ ,  $\Delta pp-1(Pccg1-pp-1-gfp)$ , and wild-type germlings. Error bars indicate standard deviation, n=4. (B) Mean height of aerial hyphae three days after inoculation (ANOVA+TukeyHSD, p<0.0001, n=6). Photo of a representative sample. (C) Mean frequency of communication and fusion between pairs of germlings (n=3, 400-700 germling pairs counted per sample). Photo depicting the germling phenotype, arrows indicate chemotropic interactions and fusion. (D) Mean growth rate per day measured over 4 days (ANOVA+TukeyHSD, p<0.01, n=3). “ac” means that the data are not significantly different from data in either groups “a” or “c”. For all barplots, error bars indicate standard deviation. (E) hyphal fusion phenotype for each strain. Arrows indicate chemotropic interactions and successful cell fusion. (F) Protoperithecial phenotype of each strain. Arrows indicate protoperithecia. (G) Perithecial production in each mutant. Mutants are female and the wild type strain was added as a male in a square shape to each plate of females. The formation of many black perithecia is indicative of successful mating.
