# Supplementary material
Source: publisher figshare collection journal article supplement (https://gsajournals.figshare.com/articles/dataset/_/6146681)
Supplement: Supplementary file 7 [file 1]

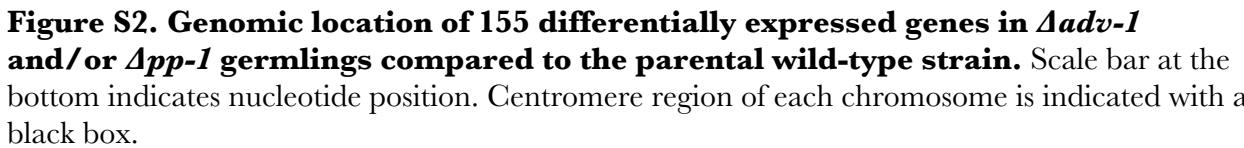

**Figure S2. Genomic location of 155 differentially expressed genes in *Δadv-1* and/or *App-1* germlings compared to the parental wild-type strain.** Scale bar at the bottom indicates nucleotide position. Centromere region of each chromosome is indicated with a black box.
