# Supplementary material
Source: publisher figshare collection journal article supplement (https://gsajournals.figshare.com/articles/dataset/_/6146681)
Supplement: Supplementary file 8 [file 1]

**A**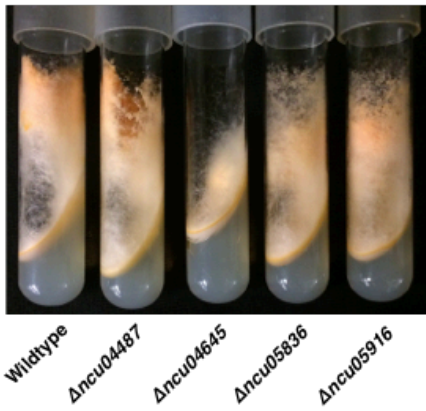**B**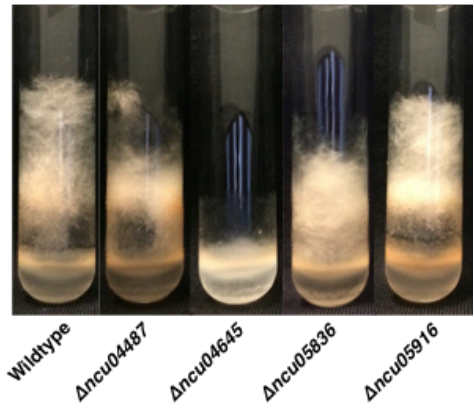

**Figure S4.** Additional phenotypes of  $\Delta\text{NCU04487}$ ,  $\Delta\text{NCU04645}$ ,  $\Delta\text{NCU05836}$  and  $\Delta\text{NCU05916}$  mutants. **(A)** Slant tube phenotype after 5 days for growth at 30°C. **(B)** Representative sample from aerial hyphae quantification assay after 3 days of growth at 30°C.
