# Supplementary material
Source: publisher figshare collection journal article supplement (https://gsajournals.figshare.com/articles/dataset/_/6146681)
Supplement: Supplementary file 9 [file 1]

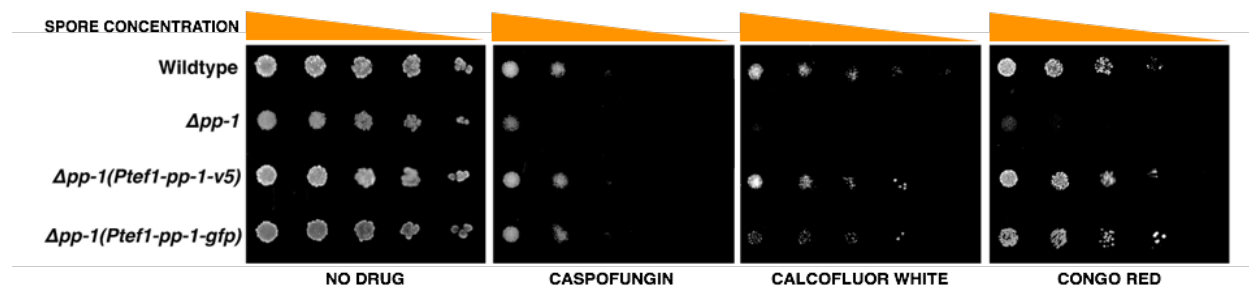

**Figure S7. Misexpression of *Pccg1-pp-1-gfp* and *Ptef1-pp-1-v5* are both sufficient to restore resistance to cell wall stress drugs in a  $\Delta pp-1$  mutant.** Spots represent a 1:5 serial dilution from 5000spores/spot to 8spores/spot. All agar media contains VMM and FGS to force colonial growth. Plates were incubated at 30°C for 3 days. Drug concentrations: 1.3ug/mL Caspofungin, 1.5mg/mL Calcofluor White, and 1mg/mL Congo Red.
