# Supplementary material
Source: publisher figshare collection journal article supplement (https://gsajournals.figshare.com/articles/dataset/_/6146681)
Supplement: Supplementary file 10 [file 1]

**Supplemental Table 3. Genes that are phosphorylated in a MAK-2-dependent manner\* and differentially expressed in *App-1* versus wild-type germlings, *Δadv-1* versus wild-type germlings, or *Δadv-1* versus Wildtype hyphae\*\***

| Gene     | Annotation                                 | Number of MAK-2 dependent phosphorylation sites (p<0.05)* |
|----------|--------------------------------------------|-----------------------------------------------------------|
| NCU05259 | acyl-CoA desaturase-1                      | 4                                                         |
| NCU09903 | elongation factor 3-2                      | 1                                                         |
| NCU03488 | orotidine-5'-phosphate decarboxylase Pyr-4 | 9                                                         |
| NCU06419 | map kinase kinase (mek-1)                  | 3                                                         |
| NCU08283 | integral membrane cation channel protein   | 2                                                         |
| NCU01068 | BAR domain-containing protein              | 2                                                         |
| NCU03888 | DUF500 and SH3 domain-containing protein   | 4                                                         |
| NCU05064 | zinc finger transcription factor-33        | 8                                                         |
| NCU02526 | hypothetical protein                       | 3                                                         |
| NCU04661 | hypothetical protein                       | 5                                                         |
| NCU04732 | Hyphal anastomosis-11 protein (ham-11)     | 6                                                         |
| NCU06117 | hypothetical protein                       | 1                                                         |
| NCU09545 | methylenetetrahydrofolate reductase 2      | 4                                                         |
| NCU07192 | determinant of communication 2 (doc-2)     | 16                                                        |
| NCU00340 | transcription factor steA (pp-1)           | 7                                                         |
| NCU01504 | calcineurin binding protein                | 6                                                         |
| NCU02794 | Fso1                                       | 17                                                        |
| NCU00521 | hypothetical protein                       | 11                                                        |
| NCU08709 | hypothetical protein                       | 2                                                         |
| NCU06409 | ribosome biogenesis-51                     | 2                                                         |
| NCU09195 | vacuolar membrane PQ loop repeat protein   | 1                                                         |
| NCU08228 | glucose dehydrogenase-2                    | 2                                                         |
| NCU04249 | hypothetical protein                       | 1                                                         |
| NCU06687 | glycogen synthase                          | 12                                                        |
| NCU05622 | beta-Ala-His dipeptidase                   | 1                                                         |
| NCU03043 | C2H2 finger domain-containing protein FlbC | 2                                                         |
| NCU02737 | transport of metals-57                     | 3                                                         |
| NCU04924 | HAD-superfamily hydrolase                  | 11                                                        |
| NCU05289 | nucleolar GTP-binding protein 1            | 3                                                         |
| NCU03113 | kinetochore protein-17                     | 5                                                         |
| NCU08229 | hypothetical protein                       | 7                                                         |
| NCU09212 | serine/threonine-protein kinase (camk-4)   | 5                                                         |
| NCU03253 | hypothetical protein                       | 6                                                         |
| NCU07398 | hypothetical protein                       | 4                                                         |
| NCU07389 | Hyphal anastomosis protein 9 (ham-9)       | 7                                                         |
| NCU09352 | far upstream element-binding protein 2     | 6                                                         |
| NCU01487 | hypothetical protein                       | 3                                                         |
| NCU07728 | siderophore regulation protein             | 4                                                         |
| NCU09259 | hypothetical protein                       | 3                                                         |
| NCU11710 | hypothetical protein                       | 1                                                         |

Differential expression defined here as  $-1 < \log_2 \text{FoldChange} < 1$  and  $p < 0.01$ . Genes were included if they were differentially expressed during at least one time point.

\*MAK-2-dependent phosphorylation data is available from Jonkers, *et al* (2016)

\*\**Δadv-1* versus wild-type hyphal data is available from Dekhang, *et al* (2017)
